# Supplementary material for: Structure, dynamics and predicted functional role of the gut microbiota of the blue (Haliotis fulgens) and yellow (H. corrugata) abalone from Baja California Sur, Mexico
Source: PeerJ. 2018 Nov 2;6:e5830. doi: 10.7717/peerj.5830 (PMC6216945; doi:10.7717/peerj.5830)
Supplement: Table S1 — Columns refer to fishing cooperative name; abalone species ID (HC for yellow abalone or Haliotis corrugata and, HF for blue abalone or Haliotis fulgens) followed by an internal numerical identifier; sampling date for each abalone reported as day/month/year; depth rage of capture (expressed in meters); cooperatives yield processing coordinate. [file peerj-06-5830-s008.xlsx]

## Sheet: Table_S1
Table S1: Sampling information for each analyzed abalone.Columns refer to fishing cooperative name; abalone species ID (HC for yellow abalone or Haliotis corrugata and, HF for blue abalone or Haliotis fulgens) followed by an internal numerical identifier; sampling date for each abalone reported as day/month/year; depth rage of capture (expressed in meters); cooperatives yield processing coordinat…
Fishing Cooperative	Sample ID	Sampling Date (dd/mm/aaaa)	Depth (m)	Geografic Coordinates
La Purisima	HC.0006	25/4/2012	No Data	27°50'50.05"N 115°4'39.31"W
California	HC.0023	26/4/2012	No Data	27°7'39.59"N 114°17'45.21"W
California	HC.0029	26/4/2012	No Data	27°7'39.59"N 114°17'45.21"W
California	HC.0040	26/4/2012	No Data	27°7'39.59"N 114°17'45.21"W
California	HC.0042	26/4/2012	No Data	27°7'39.59"N 114°17'45.21"W
Leyes de Reforma	HC.0054	27/4/2012	No Data	27°8'22.40"N 114°17'41.61"W
Leyes de Reforma	HC.0056	27/4/2012	No Data	27°8'22.40"N 114°17'41.61"W
Leyes de Reforma	HC.0060	27/4/2012	No Data	27°8'22.40"N 114°17'41.61"W
Leyes de Reforma	HC.0063	27/4/2012	No Data	27°8'22.40"N 114°17'41.61"W
Leyes de Reforma	HC.0063.2	27/4/2012	No Data	27°8'22.40"N 114°17'41.61"W
Leyes de Reforma	HC.0064	27/4/2012	No Data	27°8'22.40"N 114°17'41.61"W
Leyes de Reforma	HC.0072	27/4/2012	No Data	27°8'22.40"N 114°17'41.61"W
Leyes de Reforma	HC.0072.2	27/4/2012	No Data	27°8'22.40"N 114°17'41.61"W
Leyes de Reforma	HC.0074	27/4/2012	No Data	27°8'22.40"N 114°17'41.61"W
Leyes de Reforma	HC.0074.2	27/4/2012	No Data	27°8'22.40"N 114°17'41.61"W
Leyes de Reforma	HC.0075	27/4/2012	No Data	27°8'22.40"N 114°17'41.61"W
Leyes de Reforma	HC.0075.2	27/4/2012	No Data	27°8'22.40"N 114°17'41.61"W
Punta Abreojos	HC.0089	28/4/2012	7.3 - 11	26°42'33.84"N 113°34'26.57"W
Punta Abreojos	HC.0091	28/4/2012	7.3 - 11	26°42'33.84"N 113°34'26.57"W
Punta Abreojos	HC.0094	28/4/2012	7.3 - 11	26°42'33.84"N 113°34'26.57"W
Progreso	HC.0129	28/4/2012	No Data	26°47'26.34"N 113°42'32.87"W
Bahia Tortuga	HC.0140	2012-03-11	No Data	27°39'32.75"N 114°52'48.29"W
La Purisima	HC.0147	2012-03-11	No Data	27°50'50.05"N 115°4'39.31"W
Emancipacion	HC.0152	2012-03-11	12.8 - 23.7	27°32'4.68"N 114°44'30.59"W
Emancipacion	HC.0153	2012-03-11	12.8 - 23.7	27°32'4.68"N 114°44'30.59"W
Emancipacion	HC.0154	2012-03-11	12.8 - 23.7	27°32'4.68"N 114°44'30.59"W
Emancipacion	HC.0155	2012-03-11	12.8 - 23.7	27°32'4.68"N 114°44'30.59"W
Emancipacion	HC.0155.2	2012-03-11	12.8 - 23.7	27°32'4.68"N 114°44'30.59"W
Emancipacion	HC.0156	2012-03-11	12.8 - 23.7	27°32'4.68"N 114°44'30.59"W
Emancipacion	HC.0156.2	2012-03-11	12.8 - 23.7	27°32'4.68"N 114°44'30.59"W
Buzos y Pescadores	HC.0168	2012-03-11	No Data	27°51'12.58"N 115°10'0.51"W
Buzos y Pescadores	HC.0170	2012-03-11	No Data	27°51'12.58"N 115°10'0.51"W
Emancipacion	HC.0178	2012-03-11	12.8 - 23.7	27°32'4.68"N 114°44'30.59"W
Bahia Tortuga	HF.0004	25/4/2012	0 - 5.5	27°39'32.75"N 114°52'48.29"W
Bahia Tortuga	HF.0009	25/4/2012	0 - 5.5	27°39'32.75"N 114°52'48.29"W
Bahia Tortuga	HF.0020	25/4/2012	0 - 5.5	27°39'32.75"N 114°52'48.29"W
Bahia Tortuga	HF.0020.2	25/4/2012	0 - 5.5	27°39'32.75"N 114°52'48.29"W
Bahia Tortuga	HF.0021	25/4/2012	0 - 5.5	27°39'32.75"N 114°52'48.29"W
Bahia Tortuga	HF.0022	25/4/2012	0 - 5.5	27°39'32.75"N 114°52'48.29"W
Bahia Tortuga	HF.0022.2	25/4/2012	0 - 5.5	27°39'32.75"N 114°52'48.29"W
Bahia Tortuga	HF.0023	25/4/2012	0 - 5.5	27°39'32.75"N 114°52'48.29"W
Bahia Tortuga	HF.0024	25/4/2012	0 - 5.5	27°39'32.75"N 114°52'48.29"W
Bahia Tortuga	HF.0028	25/4/2012	0 - 5.5	27°39'32.75"N 114°52'48.29"W
Bahia Tortuga	HF.0029	25/4/2012	0 - 5.5	27°39'32.75"N 114°52'48.29"W
Bahia Tortuga	HF.0030	25/4/2012	0 - 5.5	27°39'32.75"N 114°52'48.29"W
Bahia Tortuga	HF.0030.2	25/4/2012	0 - 5.5	27°39'32.75"N 114°52'48.29"W
La Purisima	HF.0032	25/4/2012	No Data	27°50'50.05"N 115°4'39.31"W
La Purisima	HF.0037	25/4/2012	No Data	27°50'50.05"N 115°4'39.31"W
La Purisima	HF.0038	25/4/2012	No Data	27°50'50.05"N 115°4'39.31"W
California	HF.0073	26/4/2012	No Data	27°7'39.59"N 114°17'45.21"W
Punta Abreojos	HF.0080	28/4/2012	3.6 - 5.5	26°42'33.84"N 113°34'26.57"W
Punta Abreojos	HF.0083	28/4/2012	3.6 - 5.5	26°42'33.84"N 113°34'26.57"W
Punta Abreojos	HF.0086	28/4/2012	3.6 - 5.5	26°42'33.84"N 113°34'26.57"W
Punta Abreojos	HF.0087	28/4/2012	3.6 - 5.5	26°42'33.84"N 113°34'26.57"W
Punta Abreojos	HF.0088	28/4/2012	3.6 - 5.5	26°42'33.84"N 113°34'26.57"W
Progreso	HF.0097	28/4/2012	5 - 7.3	26°47'26.34"N 113°42'32.87"W
La Purisima	HF.0105	2012-03-11	No Data	27°50'50.05"N 115°4'39.31"W
Buzos y Pescadores	HF.0142	2012-03-11	No Data	27°51'12.58"N 115°10'0.51"W
Progreso	HF.0179	2012-06-11	5 - 7.3	26°47'26.34"N 113°42'32.87"W
Punta Abreojos	HF.0189	2012-07-11	3.6 - 5.5	26°42'33.84"N 113°34'26.57"W
Punta Abreojos	HF.0194	2012-07-11	3.6 - 5.5	26°42'33.84"N 113°34'26.57"W
Punta Abreojos	HF.0196	2012-07-11	3.6 - 5.5	26°42'33.84"N 113°34'26.57"W
Punta Abreojos	HF.0196.2	2012-07-11	3.6 - 5.5	26°42'33.84"N 113°34'26.57"W
Punta Abreojos	HF.0197	2012-07-11	3.6 - 5.5	26°42'33.84"N 113°34'26.57"W
