# Supplementary material for: Structure, dynamics and predicted functional role of the gut microbiota of the blue (Haliotis fulgens) and yellow (H. corrugata) abalone from Baja California Sur, Mexico
Source: PeerJ. 2018 Nov 2;6:e5830. doi: 10.7717/peerj.5830 (PMC6216945; doi:10.7717/peerj.5830)
Supplement: Table S2 — Column abbreviations refers: avarage abundance in HC and HF for each bacterial species (colums C and D respectively), average dissimilarity (column E), dissimilarity percentage of contribution for each bacterial species (column F), cumulative percentage of dissimilarity (column G). [file peerj-06-5830-s009.xlsx]

## Sheet: Table_S2
Table S2: OTUs dissimilarity between HF and HC. Column abbreviations refers: avarage abundance in HC and HF for each bacterial species (colums C and D respectively), average dissimilarity (column E), dissimilarity percentage of contribution for each bacterial species (column F), cumulative percentage of dissimilarity (column G)
Groups HC & HF
Average dissimilarity = 87.80
OTU ID	Taxonomy	Av.Abund_HC	Av.Abund_HF	Av.Diss	Contrib%	Cum.%
denovo0	Mycoplasma_1	0.3	3.48	3.29	3.74	3.74
denovo91	Mycoplasma_163	0	1.54	1.58	1.8	5.54
denovo2	Mycoplasma_40	1.13	0.52	1.41	1.6	7.15
denovo23	Mycoplasma_45	1.99	1.23	1.24	1.42	8.56
denovo21	Psychrilyobacter_2	1.04	1.56	1.2	1.36	9.93
denovo3	Mycoplasma_75	1.24	0.25	1.11	1.27	11.2
denovo176	Mycoplasma_27	0.04	1.05	1.04	1.18	12.38
denovo74	Mycoplasma_160	0.17	1.13	1.02	1.16	13.54
denovo47	Mycoplasma_111	1.05	0.1	1	1.14	14.68
denovo14	Candidatus Xenohaliotis californiensis_1	0.84	0.3	0.95	1.08	15.76
denovo3787	Mycoplasma_97	0.87	0.15	0.93	1.06	16.83
denovo224	Mycoplasma_43	0	0.92	0.91	1.03	17.86
denovo11	Mycoplasma_4	1.47	1.45	0.9	1.03	18.89
denovo3641	Mycoplasma_91	0.89	0.04	0.85	0.97	19.86
denovo134	Mycoplasma_11	0	0.82	0.84	0.95	20.81
denovo3425	Mycoplasma_81	0.79	0.12	0.84	0.95	21.77
denovo5	Vibrio; Ambiguous_taxa_2	0.74	0	0.79	0.9	22.67
denovo27	Mycoplasma_58	0.19	0.75	0.77	0.88	23.55
denovo189	Mycoplasma_36	0	0.75	0.75	0.85	24.4
denovo1507	Mycoplasma_13	0.54	0.19	0.72	0.82	25.22
denovo3533	Mycoplasma_86	0.69	0.05	0.72	0.82	26.04
denovo9	Mycoplasma_162	0	0.64	0.72	0.82	26.86
denovo25	Vibrio_2	0.6	0.28	0.7	0.8	27.66
denovo6989	Mycoplasma_154	0	0.69	0.7	0.8	28.45
denovo61	Mycoplasma_133	0.58	0.56	0.68	0.77	29.23
denovo2845	Mycoplasma_64	0.64	0	0.62	0.71	29.93
denovo2338	Mycoplasma_46	0.66	0.22	0.62	0.71	30.64
denovo6506	Psychrilyobacter_12	0.12	0.57	0.62	0.7	31.34
denovo511	Psychrilyobacter_7	0.42	0.44	0.58	0.66	32
denovo6620	Mycoplasma_142	0	0.56	0.57	0.65	32.65
denovo3618	Mycoplasma_90	0.62	0	0.57	0.65	33.3
denovo2788	Mycoplasma_61	0.57	0.03	0.57	0.64	33.95
denovo6698	Mycoplasma_145	0	0.55	0.55	0.63	34.58
denovo24	Vibrio_1	0.48	0	0.54	0.62	35.2
denovo5193	Mycoplasma_118	0.57	0	0.54	0.62	35.82
denovo2573	Mycoplasma_49	0.55	0.05	0.53	0.6	36.42
denovo5178	Mycoplasma_117	0.52	0.03	0.51	0.59	37
denovo3550	Mycoplasma_87	0.51	0	0.51	0.58	37.58
denovo2792	Mycoplasma_62	0.5	0	0.5	0.57	38.15
denovo4558	Mycoplasma_110	0.39	0.27	0.5	0.57	38.72
denovo5159	Mycoplasma_116	0.49	0	0.49	0.55	39.27
denovo4156	Mycoplasma_104	0.42	0.08	0.48	0.54	39.81
denovo4988	Psychrilyobacter_6	0.16	0.41	0.47	0.53	40.35
denovo3351	Mycoplasma_80	0.47	0	0.47	0.53	40.88
denovo5503	Mycoplasma_123	0.42	0.15	0.46	0.53	41.41
denovo1539	Mycoplasma_15	0.28	0.28	0.46	0.53	41.93
denovo597	Mycoplasma_129	0.14	0.38	0.46	0.52	42.45
denovo65	Mycoplasma_134	0.08	0.43	0.46	0.52	42.97
denovo3521	Mycoplasma_85	0.42	0	0.45	0.51	43.48
denovo1294	Mycoplasma_8	0.4	0.07	0.45	0.51	43.99
denovo7032	Mycoplasma_155	0	0.44	0.44	0.5	44.49
denovo185	Mycoplasma_34	0	0.45	0.44	0.5	44.99
denovo2946	Mycoplasma_72	0.44	0	0.43	0.5	45.48
denovo2368	Psychrilyobacter_3	0.31	0.21	0.43	0.49	45.98
denovo35	Mycoplasma_84	0	0.46	0.43	0.49	46.47
denovo121	Mycoplasma_7	0.36	0.08	0.43	0.49	46.96
denovo3789	Mycoplasma_98	0.42	0.11	0.42	0.48	47.44
denovo6808	Mycoplasma_150	0.04	0.4	0.42	0.48	47.93
denovo57	Spirochaetes_bacterium	0.29	0.05	0.42	0.48	48.4
denovo192	Mycoplasma_38	0.33	0.14	0.42	0.48	48.88
denovo2050	Psychrilyobacter_1	0.26	0.26	0.41	0.47	49.35
denovo4838	Mycoplasma_112	0.39	0.03	0.4	0.46	49.81
denovo7052	Mycoplasma_156	0.15	0.3	0.39	0.45	50.26
denovo5390	Mycoplasma_122	0.43	0	0.39	0.45	50.71
denovo5769	Mycoplasma_127	0.13	0.29	0.39	0.44	51.15
denovo1807	Mycoplasma_29	0.19	0.32	0.39	0.44	51.59
denovo3347	Mycoplasma_79	0	0.42	0.39	0.44	52.04
denovo2951	Mycoplasma_73	0.35	0.03	0.38	0.43	52.47
denovo5277	Mycoplasma_119	0.33	0.03	0.38	0.43	52.9
denovo3996	Mycoplasma_100	0.34	0.04	0.38	0.43	53.33
denovo6563	Mycoplasma_137	0	0.39	0.38	0.43	53.76
denovo72	Mycoplasma_158	0.42	0	0.37	0.42	54.18
denovo92	Mycoplasma_164	0	0.39	0.37	0.42	54.6
denovo184	Mycoplasma_33	0.35	0.07	0.37	0.42	55.02
denovo2699	Mycoplasma_57	0.33	0.1	0.37	0.42	55.44
denovo1004	Mycoplasma_2	0.14	0.26	0.36	0.42	55.85
denovo6962	Mycoplasma_153	0	0.36	0.36	0.41	56.27
denovo191	Mycoplasma_37	0	0.35	0.36	0.41	56.68
denovo3691	Mycoplasma_94	0.39	0	0.36	0.41	57.09
denovo208	Mycoplasma_41	0	0.38	0.36	0.41	57.5
denovo3272	Mycoplasma_78	0.24	0.19	0.36	0.4	57.9
denovo120	Mycoplasma_6	0.37	0.03	0.34	0.39	58.29
denovo5379	Mycoplasma_121	0.32	0.03	0.34	0.39	58.68
denovo2932	Mycoplasma_69	0.34	0	0.33	0.38	59.06
denovo3617	Mycoplasma_89	0.38	0	0.33	0.38	59.44
denovo5282	Psychrilyobacter_9	0.18	0.22	0.33	0.38	59.82
denovo1526	Mycoplasma_14	0	0.3	0.33	0.37	60.19
denovo4918	Mycoplasma_114	0.24	0.1	0.33	0.37	60.56
denovo6619	Mycoplasma_141	0	0.32	0.33	0.37	60.93
denovo40	Mycoplasma_101	0.18	0.22	0.32	0.36	61.3
denovo2666	Mycoplasma_55	0.04	0.31	0.32	0.36	61.66
denovo5507	Mycoplasma_124	0.36	0	0.32	0.36	62.03
denovo987	Mycoplasma_167	0.09	0.24	0.32	0.36	62.39
denovo3643	Mycoplasma_92	0.29	0.07	0.32	0.36	62.75
denovo2865	Mycoplasma_66	0.3	0	0.32	0.36	63.12
denovo3433	Mycoplasma_83	0.35	0	0.32	0.36	63.48
denovo34	Vibrio_4	0.24	0.05	0.32	0.36	63.84
denovo6560	Mycoplasma_136	0	0.33	0.32	0.36	64.2
denovo5130	Mycoplasma_115	0.35	0	0.32	0.36	64.56
denovo4501	Mycoplasma_109	0.33	0.07	0.32	0.36	64.92
denovo5345	Psychrilyobacter_11	0.25	0.12	0.31	0.36	65.28
denovo6700	Mycoplasma_147	0	0.26	0.31	0.36	65.63
denovo7406	Mycoplasma_161	0	0.29	0.31	0.36	65.99
denovo732	Candidatus Xenohaliotis californiensis_2	0.3	0	0.31	0.35	66.34
denovo710	Mycoplasma_157	0	0.3	0.31	0.35	66.69
denovo6607	Mycoplasma_139	0	0.28	0.3	0.34	67.04
denovo4234	Mycoplasma_105	0.34	0	0.3	0.34	67.38
denovo2919	Mycoplasma_68	0.31	0	0.3	0.34	67.72
denovo4007	Mycoplasma_102	0.32	0	0.3	0.34	68.06
denovo3716	Mycoplasma_95	0.32	0	0.3	0.34	68.4
denovo3722	Mycoplasma_96	0.23	0.03	0.29	0.33	68.74
denovo7643	Psychrilyobacter_13	0.12	0.21	0.29	0.33	69.07
denovo5602	Mycoplasma_125	0.26	0.08	0.29	0.33	69.4
denovo283	Mycoplasma_63	0	0.29	0.29	0.33	69.74
denovo4119	Mycoplasma_103	0.25	0.11	0.29	0.33	70.07
denovo6623	Mycoplasma_143	0	0.3	0.29	0.33	70.4
denovo1816	Mycoplasma_30	0	0.28	0.29	0.33	70.72
denovo6626	Mycoplasma_144	0.04	0.27	0.29	0.33	71.05
denovo217	Mycoplasma_42	0.29	0	0.29	0.32	71.38
denovo1603	Mycoplasma_19	0.04	0.27	0.28	0.32	71.7
denovo1639	Mycoplasma_24	0	0.29	0.28	0.32	72.02
denovo1795	Mycoplasma_28	0.16	0.21	0.28	0.32	72.34
denovo3432	Mycoplasma_82	0.27	0.03	0.27	0.31	72.65
denovo1832	Mycoplasma_32	0	0.27	0.27	0.31	72.96
denovo4882	Mycoplasma_113	0.04	0.27	0.27	0.31	73.26
denovo2243	Mycoplasma_44	0.21	0.09	0.27	0.3	73.57
denovo1876	Mycoplasma_35	0	0.26	0.27	0.3	73.87
denovo3663	Mycoplasma_93	0.28	0	0.27	0.3	74.17
denovo301	Mycoplasma_76	0	0.28	0.26	0.3	74.47
denovo6881	Mycoplasma_151	0	0.25	0.26	0.3	74.77
denovo41	Vibrio; Ambiguous_taxa_1	0.19	0.08	0.26	0.3	75.07
denovo12	Mycoplasma_5	0.12	0.13	0.26	0.29	75.36
denovo5674	Mycoplasma_126	0	0.28	0.26	0.29	75.65
denovo2753	Mycoplasma_60	0.11	0.15	0.26	0.29	75.95
denovo44	Mycoplasma_108	0.24	0.03	0.25	0.29	76.23
denovo3019	Mycoplasma_77	0	0.24	0.25	0.28	76.52
denovo2885	Psychrilyobacter_4	0.21	0.08	0.25	0.28	76.8
denovo3849	Mycoplasma_99	0.28	0	0.25	0.28	77.08
denovo3915	Psychrilyobacter_5	0.16	0.15	0.25	0.28	77.36
denovo6937	Mycoplasma_152	0	0.25	0.24	0.28	77.64
denovo1541	Mycoplasma_16	0	0.24	0.24	0.27	77.91
denovo5889	Mycoplasma_128	0.04	0.2	0.24	0.27	78.18
denovo1569	Mycoplasma_18	0.04	0.19	0.24	0.27	78.45
denovo6609	Mycoplasma_140	0	0.25	0.24	0.27	78.72
denovo5322	Psychrilyobacter_10	0.18	0.11	0.24	0.27	78.99
denovo1319	Mycoplasma_10	0.23	0	0.24	0.27	79.26
denovo156	Mycoplasma_17	0.23	0	0.24	0.27	79.53
denovo2953	Mycoplasma_74	0.24	0	0.23	0.26	79.79
denovo1759	Mycoplasma_26	0	0.24	0.23	0.26	80.05
denovo67	Mycoplasma_146	0.24	0	0.23	0.26	80.31
denovo1720	Mycoplasma_25	0.12	0.14	0.23	0.26	80.57
denovo6073	Mycoplasma_131	0.15	0.14	0.23	0.26	80.83
denovo1823	Mycoplasma_31	0	0.24	0.23	0.26	81.09
denovo2941	Mycoplasma_71	0.2	0.03	0.23	0.26	81.35
denovo4244	Mycoplasma_106	0	0.23	0.23	0.26	81.6
denovo4397	Mycoplasma_107	0.27	0	0.22	0.26	81.86
denovo268	Mycoplasma_56	0.04	0.22	0.22	0.25	82.11
denovo936	Psychrilyobacter_14	0.17	0.08	0.22	0.25	82.36
denovo1066	Mycoplasma_3	0.14	0.06	0.22	0.25	82.61
denovo60	Mycoplasma_130	0.11	0.12	0.22	0.25	82.86
denovo271	Mycoplasma_59	0	0.22	0.22	0.25	83.11
denovo5152	Psychrilyobacter_8	0.12	0.15	0.22	0.25	83.36
denovo6790	Mycoplasma_149	0	0.21	0.22	0.25	83.61
denovo259	Mycoplasma_50	0.04	0.18	0.22	0.25	83.85
denovo2936	Mycoplasma_70	0.24	0	0.21	0.24	84.1
denovo1629	Mycoplasma_21	0	0.2	0.21	0.24	84.34
denovo920	Mycoplasma_165	0	0.19	0.21	0.24	84.59
denovo6595	Mycoplasma_138	0	0.23	0.21	0.24	84.83
denovo1638	Mycoplasma_23	0	0.22	0.21	0.24	85.07
denovo5332	Mycoplasma_120	0	0.22	0.21	0.24	85.31
denovo1635	Mycoplasma_22	0	0.24	0.21	0.24	85.55
denovo133	Propionigenium; Ambiguous_taxa	0.16	0.09	0.21	0.23	85.78
denovo3573	Mycoplasma_88	0.19	0.03	0.21	0.23	86.02
denovo2632	Mycoplasma_53	0.16	0.03	0.21	0.23	86.25
denovo193	Mycoplasma_39	0	0.19	0.21	0.23	86.48
denovo1500	Mycoplasma_12	0	0.22	0.2	0.23	86.72
denovo285	Mycoplasma_65	0.08	0.15	0.2	0.23	86.95
denovo6514	Mycoplasma_135	0	0.21	0.2	0.23	87.18
denovo255	Mycoplasma_48	0.2	0.03	0.2	0.23	87.41
denovo2895	Mycoplasma_67	0.2	0.03	0.2	0.23	87.64
denovo980	Mycoplasma_166	0.2	0	0.2	0.22	87.86
denovo6098	Mycoplasma_132	0	0.21	0.2	0.22	88.09
denovo2615	Mycoplasma_52	0.07	0.14	0.19	0.22	88.31
denovo7210	Mycoplasma_159	0	0.18	0.19	0.22	88.53
denovo2637	Mycoplasma_54	0.19	0	0.19	0.22	88.75
denovo2867	Vibrio_3	0.2	0	0.19	0.22	88.97
denovo1303	Mycoplasma_9	0.18	0	0.19	0.22	89.18
denovo6764	Mycoplasma_148	0	0.21	0.19	0.22	89.4
denovo1606	Mycoplasma_20	0	0.2	0.19	0.22	89.62
denovo2377	Mycoplasma_47	0.06	0.16	0.19	0.22	89.83
denovo2602	Mycoplasma_51	0.22	0	0.19	0.21	90.04
