# Supplementary material for: Structure, dynamics and predicted functional role of the gut microbiota of the blue (Haliotis fulgens) and yellow (H. corrugata) abalone from Baja California Sur, Mexico
Source: PeerJ. 2018 Nov 2;6:e5830. doi: 10.7717/peerj.5830 (PMC6216945; doi:10.7717/peerj.5830)
Supplement: Table S3 — ID, taxonomy, and read number of OTUs in found yellow (HC) and blue (HF) abalone individuals. [file peerj-06-5830-s010.xlsx]

## Sheet: Table_S3
Table S3: ID, taxonomy, and read number of OTUs in found yellow (HC) and blue (HF) abalone individuals
OTU ID	Taxonomy	HC.0006	HC.0023	HC.0029	HC.0040	HC.0042	HC.0054	HC.0056	HC.0060	HC.0063	HC.0063.2	HC.0064	HC.0072	HC.0072.2	HC.0074	HC.0074.2	HC.0075	HC.0075.2	HC.0089	HC.0091	HC.0094	HC.0129	HC.0140	HC.0147	HC.0152	HC.0153	HC.0154	HC.0155	HC.0155.2	HC.0156	HC.0156.2	HC.0168	HC.0170	HC.0178	HF.0004	HF.0009	HF.0020	HF.0020.2	HF.0021	HF.0022	HF.0022.2	HF.0023	HF.0024	HF.0028	HF.0029	HF.0030	HF.0030.2	HF.0032	HF.0037
denovo133	D_0__Bacteria; D_1__Fusobacteria; D_2__Fusobacteriia; D_3__Fusobacteriales; D_4__Fusobacteriaceae; D_5__Propionigenium; Ambiguous_taxa	0	12	17	4	10	0	0	1	0	0	0	0	0	0	0	0	0	0	0	0	0	0	0	0	0	0	0	0	1	3	0	2	0	0	0	0	0	0	0	0	0	0	0	11	0	0	0	0
denovo21	D_0__Bacteria; D_1__Fusobacteria; D_2__Fusobacteriia; D_3__Fusobacteriales; D_4__Fusobacteriaceae; D_5__Psychrilyobacter; D_6__uncultured bacterium	1	24	73	225	2	0	14	38	4	0	0	5	0	0	16	12	1	12	0	0	91	0	6	30	1	0	0	0	2	22	45	4	391	7	8	139	183	121	5	1	89	0	0	145	4	8	0	64
denovo6506	D_0__Bacteria; D_1__Fusobacteria; D_2__Fusobacteriia; D_3__Fusobacteriales; D_4__Fusobacteriaceae; D_5__Psychrilyobacter; D_6__uncultured bacterium	0	12	2	0	0	0	0	0	0	0	0	0	0	0	0	0	0	0	0	0	30	0	0	0	0	0	0	0	0	0	29	0	0	1	0	0	94	74	2	4	40	0	0	1	0	3	1	35
denovo2368	D_0__Bacteria; D_1__Fusobacteria; D_2__Fusobacteriia; D_3__Fusobacteriales; D_4__Fusobacteriaceae; D_5__Psychrilyobacter; D_6__uncultured bacterium	0	1	1	33	4	0	6	2	0	0	0	0	0	0	5	0	0	2	1	0	0	0	1	7	0	0	0	0	1	0	0	0	57	0	0	38	3	0	0	0	1	0	0	0	5	0	0	0
denovo4988	D_0__Bacteria; D_1__Fusobacteria; D_2__Fusobacteriia; D_3__Fusobacteriales; D_4__Fusobacteriaceae; D_5__Psychrilyobacter; D_6__uncultured bacterium	0	1	4	67	0	0	0	1	0	0	0	0	0	0	0	0	0	0	0	0	18	0	0	0	0	0	0	0	0	0	1	0	0	0	0	0	22	10	0	0	12	0	0	1	0	1	0	12
denovo2050	D_0__Bacteria; D_1__Fusobacteria; D_2__Fusobacteriia; D_3__Fusobacteriales; D_4__Fusobacteriaceae; D_5__Psychrilyobacter; D_6__uncultured bacterium	0	1	0	16	0	0	8	2	0	0	0	0	0	0	5	2	1	0	0	0	1	0	1	11	1	0	0	0	2	0	0	0	67	0	0	13	0	9	0	0	3	0	0	0	1	0	0	0
denovo511	D_0__Bacteria; D_1__Fusobacteria; D_2__Fusobacteriia; D_3__Fusobacteriales; D_4__Fusobacteriaceae; D_5__Psychrilyobacter; D_6__uncultured bacterium	0	2	17	34	0	0	6	5	1	0	0	0	0	0	0	2	0	2	0	0	3	0	2	12	0	0	0	0	1	3	2	0	16	0	0	3	2	2	0	0	4	0	0	6	1	0	0	1
denovo2885	D_0__Bacteria; D_1__Fusobacteria; D_2__Fusobacteriia; D_3__Fusobacteriales; D_4__Fusobacteriaceae; D_5__Psychrilyobacter; D_6__uncultured bacterium	0	0	0	5	0	0	1	1	0	0	0	0	0	0	1	0	1	0	0	0	0	0	2	3	0	0	0	0	1	0	0	0	59	0	0	3	0	0	0	0	0	0	0	0	0	0	0	0
denovo7643	D_0__Bacteria; D_1__Fusobacteria; D_2__Fusobacteriia; D_3__Fusobacteriales; D_4__Fusobacteriaceae; D_5__Psychrilyobacter; D_6__uncultured bacterium	0	0	6	0	0	0	0	0	0	0	0	0	0	0	0	0	0	0	0	0	17	0	0	0	0	0	0	0	0	0	11	1	0	0	0	0	0	0	0	0	0	0	0	0	0	0	0	0
denovo5345	D_0__Bacteria; D_1__Fusobacteria; D_2__Fusobacteriia; D_3__Fusobacteriales; D_4__Fusobacteriaceae; D_5__Psychrilyobacter; D_6__uncultured bacterium	0	3	1	0	1	0	0	11	1	0	0	0	0	0	0	5	0	0	0	0	0	0	0	0	0	1	0	0	0	0	16	0	0	0	0	0	2	5	0	0	4	0	0	0	0	0	0	3
denovo936	D_0__Bacteria; D_1__Fusobacteria; D_2__Fusobacteriia; D_3__Fusobacteriales; D_4__Fusobacteriaceae; D_5__Psychrilyobacter; D_6__uncultured bacterium	0	0	0	1	0	0	0	5	0	0	0	0	0	0	3	0	0	0	0	0	0	0	0	0	1	0	0	0	1	1	0	1	45	0	0	0	0	0	0	0	0	0	0	0	0	0	0	0
denovo5282	D_0__Bacteria; D_1__Fusobacteria; D_2__Fusobacteriia; D_3__Fusobacteriales; D_4__Fusobacteriaceae; D_5__Psychrilyobacter; D_6__uncultured bacterium	0	0	2	0	0	0	0	4	0	0	0	0	0	0	0	7	0	0	0	0	3	0	0	0	0	0	0	0	0	0	2	0	0	0	0	0	9	10	0	0	6	0	0	0	0	1	0	1
denovo5152	D_0__Bacteria; D_1__Fusobacteria; D_2__Fusobacteriia; D_3__Fusobacteriales; D_4__Fusobacteriaceae; D_5__Psychrilyobacter; D_6__uncultured bacterium	0	1	0	4	0	0	0	1	0	0	0	0	0	0	0	0	1	0	0	0	0	0	0	0	0	0	0	0	0	0	1	0	0	1	0	0	5	4	0	0	3	0	0	0	0	0	0	3
denovo5322	D_0__Bacteria; D_1__Fusobacteria; D_2__Fusobacteriia; D_3__Fusobacteriales; D_4__Fusobacteriaceae; D_5__Psychrilyobacter; D_6__uncultured bacterium	0	1	5	0	3	0	0	1	3	0	0	0	0	0	0	2	0	0	0	0	1	0	0	0	0	0	0	0	0	0	0	0	0	0	0	0	5	2	1	0	0	0	0	0	0	0	0	1
denovo3915	D_0__Bacteria; D_1__Fusobacteria; D_2__Fusobacteriia; D_3__Fusobacteriales; D_4__Fusobacteriaceae; D_5__Psychrilyobacter; D_6__uncultured bacterium	0	0	1	5	0	0	1	0	0	0	0	0	0	0	0	1	0	4	0	0	0	0	0	4	0	0	0	0	0	0	0	0	0	0	0	0	0	2	0	0	0	0	0	0	0	0	0	0
denovo6722	D_0__Bacteria; D_1__Fusobacteria; D_2__Fusobacteriia; D_3__Fusobacteriales; D_4__Fusobacteriaceae; D_5__Psychrilyobacter; D_6__uncultured bacterium	0	1	1	0	0	0	0	0	0	0	0	0	0	0	0	0	0	0	0	0	2	0	0	0	0	0	0	0	0	0	0	0	0	1	0	0	0	2	0	0	3	0	0	0	0	0	0	2
denovo14	D_0__Bacteria; D_1__Proteobacteria; D_2__Alphaproteobacteria; D_3__Rickettsiales; D_4__Anaplasmataceae; D_5__Candidatus Xenohaliotis; D_6__Candidatus Xenohaliotis californiensis	0	2	0	36	2	0	0	0	0	0	1	0	0	0	1	1	0	0	14	0	0	3	56	12	173	754	137	2171	1	7	8	0	130	0	4	1	6	0	0	10	9	0	7	4	0	1	1	0
denovo732	D_0__Bacteria; D_1__Proteobacteria; D_2__Alphaproteobacteria; D_3__Rickettsiales; D_4__Anaplasmataceae; D_5__Candidatus Xenohaliotis; D_6__Candidatus Xenohaliotis californiensis	0	0	0	4	0	0	0	0	0	0	0	0	0	0	0	0	0	0	4	0	0	0	5	0	12	52	12	28	2	0	0	0	11	0	0	0	0	0	0	2	0	0	0	1	0	1	0	0
denovo87	D_0__Bacteria; D_1__Proteobacteria; D_2__Epsilonproteobacteria; D_3__Campylobacterales; D_4__Helicobacteraceae; D_5__uncultured; D_6__uncultured bacterium	0	0	0	0	0	0	0	0	0	0	0	0	0	0	0	0	0	0	0	0	0	0	0	0	0	0	0	0	0	0	0	0	0	0	1	0	0	0	0	1	0	1	0	0	2	0	0	1
denovo24	D_0__Bacteria; D_1__Proteobacteria; D_2__Gammaproteobacteria; D_3__Vibrionales; D_4__Vibrionaceae; D_5__Vibrio	0	0	0	0	0	0	0	0	0	0	0	0	0	0	1	0	0	0	0	0	0	7	2	74	8	0	2	19	0	7	30	0	344	0	0	0	0	0	0	0	0	0	0	0	0	0	0	0
denovo25	D_0__Bacteria; D_1__Proteobacteria; D_2__Gammaproteobacteria; D_3__Vibrionales; D_4__Vibrionaceae; D_5__Vibrio	1	1	14	17	45	0	0	0	0	0	0	0	7	33	14	0	0	22	4	0	1	4	56	1	1	0	0	0	0	0	0	0	2	0	1	0	0	0	0	0	0	0	0	0	0	0	0	0
denovo34	D_0__Bacteria; D_1__Proteobacteria; D_2__Gammaproteobacteria; D_3__Vibrionales; D_4__Vibrionaceae; D_5__Vibrio	0	2	0	0	0	0	0	0	0	0	0	0	0	0	0	0	0	0	0	0	3	23	5	0	2	0	0	1	1	10	8	0	28	0	0	0	0	0	0	0	0	0	0	0	0	0	0	0
denovo2867	D_0__Bacteria; D_1__Proteobacteria; D_2__Gammaproteobacteria; D_3__Vibrionales; D_4__Vibrionaceae; D_5__Vibrio	0	1	1	5	3	0	0	0	0	0	0	0	0	7	7	0	0	1	2	0	0	0	9	0	1	0	0	0	0	0	0	0	0	0	0	0	0	0	0	0	0	0	0	0	0	0	0	0
denovo5	D_0__Bacteria; D_1__Proteobacteria; D_2__Gammaproteobacteria; D_3__Vibrionales; D_4__Vibrionaceae; D_5__Vibrio; Ambiguous_taxa	0	4	1	3	0	0	0	0	0	0	0	1	0	0	36	0	0	0	0	0	0	1	0	597	15	0	7	74	2	54	143	0	1694	0	0	0	0	0	0	0	4	0	0	0	0	5	0	0
denovo41	D_0__Bacteria; D_1__Proteobacteria; D_2__Gammaproteobacteria; D_3__Vibrionales; D_4__Vibrionaceae; D_5__Vibrio; Ambiguous_taxa	0	56	27	4	151	0	2	0	0	1	0	0	0	0	0	0	0	0	0	1	0	0	0	0	0	0	0	0	0	0	0	0	1	0	0	0	0	0	0	0	0	1	0	0	0	3	0	0
denovo57	D_0__Bacteria; D_1__Spirochaetae; D_2__Spirochaetes; D_3__Spirochaetales; D_4__Spirochaetaceae; D_5__uncultured; D_6__uncultured Spirochaetes bacterium	5	0	0	0	0	1	5	0	0	0	0	0	0	0	0	0	0	1	0	0	0	0	0	6	1	0	11	270	0	0	0	1	1	0	0	0	0	0	0	0	0	0	2	0	0	4	0	0
denovo0	D_0__Bacteria; D_1__Tenericutes; D_2__Mollicutes; D_3__Mycoplasmatales; D_4__Mycoplasmataceae; D_5__Mycoplasma; D_6__uncultured bacterium	0	0	0	0	0	0	0	1	1	0	0	0	0	0	0	2	0	0	0	0	52	4	0	102	0	0	8	74	1	2	0	0	0	140	1298	370	1660	579	518	1831	3850	3089	1446	415	104	341	154	2948
denovo9	D_0__Bacteria; D_1__Tenericutes; D_2__Mollicutes; D_3__Mycoplasmatales; D_4__Mycoplasmataceae; D_5__Mycoplasma; D_6__uncultured bacterium	0	0	0	0	0	0	0	0	0	0	0	0	0	0	0	0	0	0	0	0	92	0	0	0	0	0	0	0	0	0	0	0	0	7400	0	0	0	174	0	0	2	0	1	120	0	0	0	0
denovo23	D_0__Bacteria; D_1__Tenericutes; D_2__Mollicutes; D_3__Mycoplasmatales; D_4__Mycoplasmataceae; D_5__Mycoplasma; D_6__uncultured bacterium	0	40	260	397	95	6	0	142	23	135	6	7	19	82	149	123	8	1843	1611	14	0	0	516	1	96	484	1	36	0	27	41	58	683	2	53	24	118	6	18	34	59	61	155	26	11	19	0	36
denovo2	D_0__Bacteria; D_1__Tenericutes; D_2__Mollicutes; D_3__Mycoplasmatales; D_4__Mycoplasmataceae; D_5__Mycoplasma; D_6__uncultured bacterium	0	0	18	2	0	534	410	0	307	2589	0	110	525	6	11	0	189	0	2	0	0	0	0	4	1	0	0	0	2	33	0	0	0	0	916	0	0	0	0	0	0	0	0	3	0	0	21	0
denovo11	D_0__Bacteria; D_1__Tenericutes; D_2__Mollicutes; D_3__Mycoplasmatales; D_4__Mycoplasmataceae; D_5__Mycoplasma; D_6__uncultured bacterium	8	3	1	4	0	4	82	32	12	96	2	4	103	28	254	4	2	23	554	179	6	58	294	17	377	35	0	1	0	0	0	0	364	45	248	10	24	279	1	1	153	187	32	5	12	61	3	3
denovo3	D_0__Bacteria; D_1__Tenericutes; D_2__Mollicutes; D_3__Mycoplasmatales; D_4__Mycoplasmataceae; D_5__Mycoplasma; D_6__uncultured bacterium	0	0	43	72	14	0	0	29	2	19	0	6	7	7	27	13	1	445	893	3	0	0	196	0	82	95	0	2	0	1	2	7	548	0	0	0	4	2	0	41	0	3	0	0	1	2	0	5
denovo91	D_0__Bacteria; D_1__Tenericutes; D_2__Mollicutes; D_3__Mycoplasmatales; D_4__Mycoplasmataceae; D_5__Mycoplasma; D_6__uncultured bacterium	0	0	0	0	0	0	0	0	0	0	0	0	0	0	0	0	0	0	0	0	6	0	0	0	0	0	0	0	0	0	0	0	0	8	67	25	81	32	29	62	112	115	176	30	17	9	23	135
denovo1507	D_0__Bacteria; D_1__Tenericutes; D_2__Mollicutes; D_3__Mycoplasmatales; D_4__Mycoplasmataceae; D_5__Mycoplasma; D_6__uncultured bacterium	0	0	1	0	0	2	82	0	3	98	0	5	129	4	3	0	11	0	0	0	0	0	0	4	1	0	0	0	1	0	0	0	0	0	305	0	0	0	0	0	0	0	0	0	0	0	0	0
denovo2845	D_0__Bacteria; D_1__Tenericutes; D_2__Mollicutes; D_3__Mycoplasmatales; D_4__Mycoplasmataceae; D_5__Mycoplasma; D_6__uncultured bacterium	0	0	0	0	0	0	0	1	3	82	1	6	17	28	446	2	0	42	138	111	0	0	1	0	39	0	0	0	34	0	0	0	6	0	0	0	0	0	0	0	0	0	0	0	0	0	0	0
denovo47	D_0__Bacteria; D_1__Tenericutes; D_2__Mollicutes; D_3__Mycoplasmatales; D_4__Mycoplasmataceae; D_5__Mycoplasma; D_6__uncultured bacterium	0	6	2	5	1	0	0	5	38	52	29	40	57	28	99	13	3	77	167	199	0	0	6	2	11	3	0	0	15	43	0	0	1	0	7	0	0	0	0	0	0	4	0	2	1	0	0	0
denovo2792	D_0__Bacteria; D_1__Tenericutes; D_2__Mollicutes; D_3__Mycoplasmatales; D_4__Mycoplasmataceae; D_5__Mycoplasma; D_6__uncultured bacterium	0	0	0	0	0	0	0	0	2	8	2	0	262	51	432	0	0	16	40	30	0	0	0	0	19	0	0	0	0	0	0	0	4	0	0	0	0	0	0	0	0	0	0	0	0	0	0	0
denovo3641	D_0__Bacteria; D_1__Tenericutes; D_2__Mollicutes; D_3__Mycoplasmatales; D_4__Mycoplasmataceae; D_5__Mycoplasma; D_6__uncultured bacterium	1	2	0	3	14	0	1	109	15	36	0	0	0	26	0	25	3	343	0	4	0	0	104	1	3	74	1	0	0	0	2	3	38	0	0	0	0	0	0	0	0	1	0	0	6	0	0	0
denovo4156	D_0__Bacteria; D_1__Tenericutes; D_2__Mollicutes; D_3__Mycoplasmatales; D_4__Mycoplasmataceae; D_5__Mycoplasma; D_6__uncultured bacterium	0	0	2	4	0	21	0	0	5	595	0	5	0	6	0	0	82	0	0	0	0	0	0	0	0	0	0	0	0	0	0	0	0	0	0	0	0	0	0	0	0	0	0	0	0	0	0	0
denovo2573	D_0__Bacteria; D_1__Tenericutes; D_2__Mollicutes; D_3__Mycoplasmatales; D_4__Mycoplasmataceae; D_5__Mycoplasma; D_6__uncultured bacterium	0	0	1	0	0	0	0	7	0	4	0	0	5	1	40	2	0	126	435	0	0	0	9	0	9	9	0	0	0	0	1	7	33	0	0	8	0	0	0	0	0	0	0	0	0	0	0	0
denovo3425	D_0__Bacteria; D_1__Tenericutes; D_2__Mollicutes; D_3__Mycoplasmatales; D_4__Mycoplasmataceae; D_5__Mycoplasma; D_6__uncultured bacterium	3	1	0	3	0	1	7	8	11	14	0	1	1	33	0	1	2	1	0	15	0	6	141	7	231	7	0	0	0	0	0	0	135	3	0	0	0	7	0	0	0	4	0	0	4	0	1	0
denovo3351	D_0__Bacteria; D_1__Tenericutes; D_2__Mollicutes; D_3__Mycoplasmatales; D_4__Mycoplasmataceae; D_5__Mycoplasma; D_6__uncultured bacterium	0	0	0	0	0	0	0	0	1	204	1	4	20	2	0	0	0	118	0	195	0	0	0	1	54	0	0	0	4	0	0	0	11	0	0	0	0	0	0	0	0	0	0	0	0	0	0	0
denovo1539	D_0__Bacteria; D_1__Tenericutes; D_2__Mollicutes; D_3__Mycoplasmatales; D_4__Mycoplasmataceae; D_5__Mycoplasma; D_6__uncultured bacterium	0	0	0	0	0	0	0	4	1	3	0	0	3	0	29	0	0	169	238	0	0	0	2	0	7	1	0	0	0	0	0	0	1	0	6	15	0	0	0	1	0	0	17	5	1	0	0	0
denovo74	D_0__Bacteria; D_1__Tenericutes; D_2__Mollicutes; D_3__Mycoplasmatales; D_4__Mycoplasmataceae; D_5__Mycoplasma; D_6__uncultured bacterium	0	0	0	0	0	0	0	0	0	0	0	0	0	0	0	0	0	0	0	0	7	2	0	17	0	0	0	9	2	2	0	0	0	2	14	4	7	8	8	11	27	5	11	18	1	4	2	6
denovo2788	D_0__Bacteria; D_1__Tenericutes; D_2__Mollicutes; D_3__Mycoplasmatales; D_4__Mycoplasmataceae; D_5__Mycoplasma; D_6__uncultured bacterium	0	0	1	0	0	0	0	1	3	17	2	3	194	4	183	5	0	11	49	32	0	0	5	0	10	0	0	0	1	0	0	0	8	0	0	0	0	0	0	0	0	1	0	0	0	0	0	0
denovo27	D_0__Bacteria; D_1__Tenericutes; D_2__Mollicutes; D_3__Mycoplasmatales; D_4__Mycoplasmataceae; D_5__Mycoplasma; D_6__uncultured bacterium	0	0	0	0	0	0	0	0	0	0	0	0	0	0	0	0	0	0	0	0	0	3	0	41	0	0	1	14	1	1	0	0	0	0	13	1	12	5	11	30	32	7	4	12	2	5	0	8
denovo6620	D_0__Bacteria; D_1__Tenericutes; D_2__Mollicutes; D_3__Mycoplasmatales; D_4__Mycoplasmataceae; D_5__Mycoplasma; D_6__uncultured bacterium	0	0	0	0	0	0	0	0	0	0	0	0	0	0	0	0	0	0	0	0	0	0	0	0	0	0	0	0	0	0	0	0	0	18	0	0	58	218	31	13	48	2	0	5	0	0	65	3
denovo3618	D_0__Bacteria; D_1__Tenericutes; D_2__Mollicutes; D_3__Mycoplasmatales; D_4__Mycoplasmataceae; D_5__Mycoplasma; D_6__uncultured bacterium	0	2	3	3	0	0	0	1	44	99	24	32	1	45	0	6	0	44	0	130	0	0	1	0	7	0	0	0	28	0	0	0	4	0	0	0	0	0	0	0	0	0	0	0	0	0	0	0
denovo224	D_0__Bacteria; D_1__Tenericutes; D_2__Mollicutes; D_3__Mycoplasmatales; D_4__Mycoplasmataceae; D_5__Mycoplasma; D_6__uncultured bacterium	0	0	0	0	0	0	0	0	0	0	0	0	0	0	0	0	0	0	0	0	0	0	0	3	0	0	0	1	0	0	0	0	0	0	31	10	16	11	6	10	37	18	25	18	0	3	0	21
denovo3787	D_0__Bacteria; D_1__Tenericutes; D_2__Mollicutes; D_3__Mycoplasmatales; D_4__Mycoplasmataceae; D_5__Mycoplasma; D_6__uncultured bacterium	10	0	0	5	1	8	25	29	8	40	0	1	1	67	0	4	1	0	0	21	0	36	38	30	60	17	0	0	0	0	0	0	0	0	0	0	0	0	0	0	0	0	0	1	15	0	0	0
denovo3691	D_0__Bacteria; D_1__Tenericutes; D_2__Mollicutes; D_3__Mycoplasmatales; D_4__Mycoplasmataceae; D_5__Mycoplasma; D_6__uncultured bacterium	0	1	0	0	0	0	0	0	2	58	2	2	1	25	0	5	0	15	0	268	0	0	3	1	2	0	0	0	22	0	0	0	0	0	0	0	0	0	0	0	0	0	0	0	0	0	0	0
denovo3533	D_0__Bacteria; D_1__Tenericutes; D_2__Mollicutes; D_3__Mycoplasmatales; D_4__Mycoplasmataceae; D_5__Mycoplasma; D_6__uncultured bacterium	1	2	0	0	0	0	15	2	8	16	0	1	0	11	0	6	0	19	0	53	0	2	86	8	115	1	0	0	1	0	0	0	17	8	0	0	0	24	0	0	0	0	0	0	0	0	0	0
denovo6989	D_0__Bacteria; D_1__Tenericutes; D_2__Mollicutes; D_3__Mycoplasmatales; D_4__Mycoplasmataceae; D_5__Mycoplasma; D_6__uncultured bacterium	0	0	0	0	0	0	0	0	0	0	0	0	0	0	0	0	0	0	0	0	1	0	0	0	0	0	0	0	0	0	0	0	0	1	0	0	0	0	0	10	12	56	0	6	0	3	6	30
denovo61	D_0__Bacteria; D_1__Tenericutes; D_2__Mollicutes; D_3__Mycoplasmatales; D_4__Mycoplasmataceae; D_5__Mycoplasma; D_6__uncultured bacterium	3	0	2	0	0	1	6	0	4	9	0	2	0	8	4	0	0	0	25	4	0	0	25	2	18	6	0	1	0	0	0	0	37	3	49	2	1	35	1	0	15	7	11	3	1	0	0	0
denovo6698	D_0__Bacteria; D_1__Tenericutes; D_2__Mollicutes; D_3__Mycoplasmatales; D_4__Mycoplasmataceae; D_5__Mycoplasma; D_6__uncultured bacterium	0	2	0	0	0	0	0	0	0	0	0	0	0	0	0	0	0	0	0	0	3	0	0	0	0	0	0	0	0	0	0	0	0	24	0	0	0	196	3	0	47	41	0	4	0	9	5	1
denovo1526	D_0__Bacteria; D_1__Tenericutes; D_2__Mollicutes; D_3__Mycoplasmatales; D_4__Mycoplasmataceae; D_5__Mycoplasma; D_6__uncultured bacterium	0	0	0	0	0	0	0	0	0	0	0	0	0	0	0	0	0	0	0	0	0	0	0	0	0	0	0	0	0	0	0	0	0	0	15	1	0	6	0	0	1	3	8	0	0	0	0	0
denovo176	D_0__Bacteria; D_1__Tenericutes; D_2__Mollicutes; D_3__Mycoplasmatales; D_4__Mycoplasmataceae; D_5__Mycoplasma; D_6__uncultured bacterium	0	0	0	0	0	0	0	0	0	0	0	0	0	0	0	0	0	0	0	0	4	0	0	3	0	0	0	2	0	0	0	0	0	0	15	2	14	3	8	9	18	18	10	9	5	2	5	17
denovo3789	D_0__Bacteria; D_1__Tenericutes; D_2__Mollicutes; D_3__Mycoplasmatales; D_4__Mycoplasmataceae; D_5__Mycoplasma; D_6__uncultured bacterium	0	0	4	6	1	0	0	22	0	34	0	0	0	10	0	4	0	172	0	3	0	0	12	0	8	7	2	0	1	0	0	0	0	1	0	0	0	1	0	0	3	2	0	0	6	1	0	0
denovo2338	D_0__Bacteria; D_1__Tenericutes; D_2__Mollicutes; D_3__Mycoplasmatales; D_4__Mycoplasmataceae; D_5__Mycoplasma; D_6__uncultured bacterium	0	1	5	7	2	0	0	5	0	7	0	1	0	3	14	1	0	78	115	0	0	0	3	0	2	9	0	0	0	0	0	0	7	4	0	5	0	4	0	0	2	11	10	2	0	0	0	2
denovo134	D_0__Bacteria; D_1__Tenericutes; D_2__Mollicutes; D_3__Mycoplasmatales; D_4__Mycoplasmataceae; D_5__Mycoplasma; D_6__uncultured bacterium	0	0	0	0	0	0	0	0	0	0	0	0	0	0	0	0	0	0	0	0	5	0	0	0	0	0	0	0	0	0	0	0	0	1	8	16	2	2	20	7	8	1	54	4	1	1	4	7
denovo2666	D_0__Bacteria; D_1__Tenericutes; D_2__Mollicutes; D_3__Mycoplasmatales; D_4__Mycoplasmataceae; D_5__Mycoplasma; D_6__uncultured bacterium	0	0	0	0	0	0	0	0	0	0	0	0	0	0	0	0	1	0	0	0	0	0	0	0	0	0	2	0	0	0	0	0	0	0	0	173	0	0	2	4	2	2	0	1	42	0	0	1
denovo3550	D_0__Bacteria; D_1__Tenericutes; D_2__Mollicutes; D_3__Mycoplasmatales; D_4__Mycoplasmataceae; D_5__Mycoplasma; D_6__uncultured bacterium	0	1	0	0	0	0	4	0	2	85	0	3	5	3	0	1	1	47	0	71	0	0	2	1	42	0	0	0	0	0	0	0	3	0	0	0	0	0	0	0	0	0	0	0	0	0	0	0
denovo44	D_0__Bacteria; D_1__Tenericutes; D_2__Mollicutes; D_3__Mycoplasmatales; D_4__Mycoplasmataceae; D_5__Mycoplasma; D_6__uncultured bacterium	0	0	0	0	0	0	0	0	2	11	0	0	3	0	22	0	0	78	123	11	0	0	7	0	4	0	0	0	0	0	0	0	2	0	0	0	0	0	0	0	0	0	0	1	0	0	0	0
denovo2946	D_0__Bacteria; D_1__Tenericutes; D_2__Mollicutes; D_3__Mycoplasmatales; D_4__Mycoplasmataceae; D_5__Mycoplasma; D_6__uncultured bacterium	0	0	1	0	0	0	0	1	3	15	0	2	3	5	109	0	0	18	24	24	0	0	0	0	22	0	0	0	7	0	0	0	2	0	0	0	0	0	0	0	0	0	0	0	0	0	0	0
denovo35	D_0__Bacteria; D_1__Tenericutes; D_2__Mollicutes; D_3__Mycoplasmatales; D_4__Mycoplasmataceae; D_5__Mycoplasma; D_6__uncultured bacterium	0	0	0	0	0	0	0	0	0	0	0	0	0	0	0	0	0	0	0	0	0	0	0	0	0	0	0	0	0	0	0	0	0	2	15	1	6	1	19	87	18	6	3	13	0	4	0	2
denovo5193	D_0__Bacteria; D_1__Tenericutes; D_2__Mollicutes; D_3__Mycoplasmatales; D_4__Mycoplasmataceae; D_5__Mycoplasma; D_6__uncultured bacterium	0	1	19	2	41	2	0	20	4	0	0	0	0	0	0	28	1	0	0	0	0	0	0	0	0	111	0	0	0	0	1	0	0	0	0	0	0	0	0	0	0	0	0	0	0	0	0	0
denovo3663	D_0__Bacteria; D_1__Tenericutes; D_2__Mollicutes; D_3__Mycoplasmatales; D_4__Mycoplasmataceae; D_5__Mycoplasma; D_6__uncultured bacterium	0	0	0	20	1	0	0	0	1	12	0	0	0	0	0	0	0	16	0	1	0	0	104	1	27	4	0	0	0	0	0	0	41	0	0	0	0	0	0	0	0	0	0	0	0	0	0	0
denovo4558	D_0__Bacteria; D_1__Tenericutes; D_2__Mollicutes; D_3__Mycoplasmatales; D_4__Mycoplasmataceae; D_5__Mycoplasma; D_6__uncultured bacterium	0	0	3	81	11	0	0	3	0	0	0	0	0	10	0	2	2	0	0	0	0	0	0	0	0	12	1	0	0	0	1	0	0	4	0	0	45	5	1	2	9	13	0	2	0	7	0	2
denovo1004	D_0__Bacteria; D_1__Tenericutes; D_2__Mollicutes; D_3__Mycoplasmatales; D_4__Mycoplasmataceae; D_5__Mycoplasma; D_6__uncultured bacterium	0	0	0	0	0	0	4	0	0	0	0	0	0	0	10	0	0	1	50	1	0	0	2	0	3	0	0	0	0	0	0	0	8	1	62	0	0	0	0	0	0	0	8	0	0	0	0	0
denovo597	D_0__Bacteria; D_1__Tenericutes; D_2__Mollicutes; D_3__Mycoplasmatales; D_4__Mycoplasmataceae; D_5__Mycoplasma; D_6__uncultured bacterium	0	0	0	0	0	0	0	0	0	0	0	0	3	2	18	0	0	0	74	1	0	0	1	1	5	0	0	0	0	0	0	0	0	2	24	2	0	5	0	0	0	3	14	0	0	1	0	0
denovo6808	D_0__Bacteria; D_1__Tenericutes; D_2__Mollicutes; D_3__Mycoplasmatales; D_4__Mycoplasmataceae; D_5__Mycoplasma; D_6__uncultured bacterium	0	0	2	0	0	0	0	0	0	0	0	0	0	0	0	0	0	0	0	0	3	0	0	0	0	0	0	0	0	0	0	0	0	111	0	0	0	0	3	2	17	34	0	3	0	4	0	0
denovo3643	D_0__Bacteria; D_1__Tenericutes; D_2__Mollicutes; D_3__Mycoplasmatales; D_4__Mycoplasmataceae; D_5__Mycoplasma; D_6__uncultured bacterium	0	0	0	1	1	0	0	2	0	8	0	0	0	0	0	1	0	145	0	4	0	0	44	0	3	5	0	0	0	0	0	0	2	0	0	0	1	0	0	0	0	0	0	1	1	1	0	1
denovo5159	D_0__Bacteria; D_1__Tenericutes; D_2__Mollicutes; D_3__Mycoplasmatales; D_4__Mycoplasmataceae; D_5__Mycoplasma; D_6__uncultured bacterium	1	2	2	4	2	1	0	20	102	0	39	28	0	0	0	19	0	0	0	0	0	0	0	0	0	0	0	0	0	0	0	0	0	0	0	0	0	0	0	0	0	0	0	0	0	0	0	0
denovo7052	D_0__Bacteria; D_1__Tenericutes; D_2__Mollicutes; D_3__Mycoplasmatales; D_4__Mycoplasmataceae; D_5__Mycoplasma; D_6__uncultured bacterium	0	10	50	0	0	0	0	0	0	0	1	0	0	0	0	0	0	0	0	0	0	0	0	0	0	0	0	0	0	0	10	37	0	0	0	0	0	0	1	0	27	10	0	17	0	3	0	12
denovo7032	D_0__Bacteria; D_1__Tenericutes; D_2__Mollicutes; D_3__Mycoplasmatales; D_4__Mycoplasmataceae; D_5__Mycoplasma; D_6__uncultured bacterium	0	0	0	0	0	0	0	0	0	0	0	0	0	0	0	0	0	0	0	0	0	0	0	0	0	0	0	0	0	0	0	0	0	0	0	0	0	0	3	7	25	66	0	11	0	0	10	45
denovo1816	D_0__Bacteria; D_1__Tenericutes; D_2__Mollicutes; D_3__Mycoplasmatales; D_4__Mycoplasmataceae; D_5__Mycoplasma; D_6__uncultured bacterium	0	0	0	0	0	0	0	0	0	0	0	0	0	0	0	0	0	0	0	0	1	0	0	0	0	0	0	0	0	0	0	0	0	0	0	0	0	0	0	2	0	1	0	38	1	0	0	0
denovo1294	D_0__Bacteria; D_1__Tenericutes; D_2__Mollicutes; D_3__Mycoplasmatales; D_4__Mycoplasmataceae; D_5__Mycoplasma; D_6__uncultured bacterium	0	0	0	0	0	1	0	0	10	16	0	9	54	0	8	0	0	0	23	0	0	0	0	1	0	0	0	0	0	68	0	0	0	0	4	0	0	0	0	0	0	0	0	0	0	0	0	0
denovo189	D_0__Bacteria; D_1__Tenericutes; D_2__Mollicutes; D_3__Mycoplasmatales; D_4__Mycoplasmataceae; D_5__Mycoplasma; D_6__uncultured bacterium	0	0	0	0	0	0	0	0	0	0	0	0	0	0	0	0	0	0	0	0	2	0	0	0	0	0	0	0	0	0	0	0	0	0	9	4	10	10	6	6	20	12	18	6	0	0	5	11
denovo5178	D_0__Bacteria; D_1__Tenericutes; D_2__Mollicutes; D_3__Mycoplasmatales; D_4__Mycoplasmataceae; D_5__Mycoplasma; D_6__uncultured bacterium	0	0	33	23	31	1	0	17	5	0	0	0	0	0	0	3	0	0	0	0	0	0	0	0	0	68	0	0	0	0	1	3	0	0	0	0	3	2	0	0	1	1	0	0	0	1	0	0
denovo5503	D_0__Bacteria; D_1__Tenericutes; D_2__Mollicutes; D_3__Mycoplasmatales; D_4__Mycoplasmataceae; D_5__Mycoplasma; D_6__uncultured bacterium	0	4	14	0	0	0	0	17	4	0	0	1	0	0	0	31	0	0	0	0	0	0	0	0	0	76	0	0	0	0	3	2	0	0	0	0	24	0	0	0	7	3	0	0	0	0	0	4
denovo12	D_0__Bacteria; D_1__Tenericutes; D_2__Mollicutes; D_3__Mycoplasmatales; D_4__Mycoplasmataceae; D_5__Mycoplasma; D_6__uncultured bacterium	0	0	0	0	0	0	0	0	0	0	0	0	0	0	0	0	0	0	0	0	0	0	0	0	0	0	0	0	0	0	116	0	0	0	3	0	6	1	0	0	0	0	0	0	0	0	0	4
denovo1629	D_0__Bacteria; D_1__Tenericutes; D_2__Mollicutes; D_3__Mycoplasmatales; D_4__Mycoplasmataceae; D_5__Mycoplasma; D_6__uncultured bacterium	0	0	0	0	0	0	0	0	0	0	0	0	0	0	0	0	0	0	0	0	0	0	0	0	0	0	0	0	0	0	0	0	0	1	132	0	3	1	0	2	1	0	5	0	0	0	0	2
denovo5507	D_0__Bacteria; D_1__Tenericutes; D_2__Mollicutes; D_3__Mycoplasmatales; D_4__Mycoplasmataceae; D_5__Mycoplasma; D_6__uncultured bacterium	0	1	1	0	0	0	0	27	13	0	0	1	0	0	0	36	0	0	0	0	0	0	0	0	0	77	0	0	0	0	2	2	0	0	0	0	0	0	0	0	1	0	0	0	0	0	0	0
denovo5602	D_0__Bacteria; D_1__Tenericutes; D_2__Mollicutes; D_3__Mycoplasmatales; D_4__Mycoplasmataceae; D_5__Mycoplasma; D_6__uncultured bacterium	0	1	0	0	0	0	0	0	50	0	5	48	0	0	0	17	0	0	0	0	0	0	0	0	0	13	0	0	0	0	0	0	0	1	0	0	9	0	0	0	0	10	0	0	0	0	0	0
denovo67	D_0__Bacteria; D_1__Tenericutes; D_2__Mollicutes; D_3__Mycoplasmatales; D_4__Mycoplasmataceae; D_5__Mycoplasma; D_6__uncultured bacterium	0	0	1	1	0	0	0	3	0	7	0	0	0	0	4	0	0	24	76	0	0	0	15	0	6	1	0	0	0	0	0	0	17	0	0	0	0	0	0	0	0	0	0	0	0	0	0	0
denovo5130	D_0__Bacteria; D_1__Tenericutes; D_2__Mollicutes; D_3__Mycoplasmatales; D_4__Mycoplasmataceae; D_5__Mycoplasma; D_6__uncultured bacterium	0	4	1	14	0	0	0	14	72	0	7	27	0	0	0	14	1	0	0	0	0	0	0	0	0	0	0	0	0	0	0	0	0	0	0	0	0	1	0	0	0	0	0	0	0	0	0	0
denovo3996	D_0__Bacteria; D_1__Tenericutes; D_2__Mollicutes; D_3__Mycoplasmatales; D_4__Mycoplasmataceae; D_5__Mycoplasma; D_6__uncultured bacterium	0	0	0	1	0	1	14	0	37	50	0	16	0	0	0	0	4	0	0	22	0	0	0	0	0	0	0	0	1	0	0	0	0	0	0	0	0	0	0	0	0	0	0	0	0	0	0	0
denovo65	D_0__Bacteria; D_1__Tenericutes; D_2__Mollicutes; D_3__Mycoplasmatales; D_4__Mycoplasmataceae; D_5__Mycoplasma; D_6__uncultured bacterium	0	1	2	0	1	0	0	0	0	3	0	0	0	0	0	0	0	3	20	0	0	0	7	0	0	1	0	0	0	0	0	0	1	0	5	2	29	0	0	0	7	0	12	4	1	7	0	8
denovo3347	D_0__Bacteria; D_1__Tenericutes; D_2__Mollicutes; D_3__Mycoplasmatales; D_4__Mycoplasmataceae; D_5__Mycoplasma; D_6__uncultured bacterium	0	0	0	0	0	0	0	0	0	0	0	0	0	0	0	0	0	0	0	0	0	0	0	0	1	0	0	0	0	0	0	0	0	0	0	49	14	2	31	17	0	8	0	1	11	0	0	1
denovo4838	D_0__Bacteria; D_1__Tenericutes; D_2__Mollicutes; D_3__Mycoplasmatales; D_4__Mycoplasmataceae; D_5__Mycoplasma; D_6__uncultured bacterium	1	0	0	2	0	2	0	0	13	0	4	8	0	87	0	5	6	0	0	0	0	0	0	0	0	15	0	0	0	0	0	0	0	0	0	0	0	0	0	0	0	1	0	0	0	0	0	0
denovo5674	D_0__Bacteria; D_1__Tenericutes; D_2__Mollicutes; D_3__Mycoplasmatales; D_4__Mycoplasmataceae; D_5__Mycoplasma; D_6__uncultured bacterium	0	0	0	0	0	0	0	0	0	0	0	0	0	0	0	0	0	0	0	0	0	0	0	0	0	0	0	0	0	0	0	0	0	0	0	0	10	8	12	4	3	3	0	0	0	0	1	1
denovo40	D_0__Bacteria; D_1__Tenericutes; D_2__Mollicutes; D_3__Mycoplasmatales; D_4__Mycoplasmataceae; D_5__Mycoplasma; D_6__uncultured bacterium	0	1	0	0	0	0	0	0	0	2	1	0	0	3	0	0	0	0	3	0	0	0	0	0	8	1	0	0	0	8	0	0	25	2	9	1	2	4	5	5	3	11	5	3	0	1	0	3
denovo2865	D_0__Bacteria; D_1__Tenericutes; D_2__Mollicutes; D_3__Mycoplasmatales; D_4__Mycoplasmataceae; D_5__Mycoplasma; D_6__uncultured bacterium	0	0	0	0	0	1	20	0	0	5	0	0	0	0	11	1	0	0	38	2	0	0	5	1	4	1	0	0	0	0	0	0	44	0	0	0	0	0	0	0	0	0	0	0	0	0	0	0
denovo1697	D_0__Bacteria; D_1__Tenericutes; D_2__Mollicutes; D_3__Mycoplasmatales; D_4__Mycoplasmataceae; D_5__Mycoplasma; D_6__uncultured bacterium	0	0	0	0	0	0	0	0	0	0	0	0	0	0	0	0	0	0	0	0	0	0	0	0	0	0	0	0	0	0	0	0	0	0	95	0	0	1	0	0	5	1	4	8	0	0	1	0
denovo5277	D_0__Bacteria; D_1__Tenericutes; D_2__Mollicutes; D_3__Mycoplasmatales; D_4__Mycoplasmataceae; D_5__Mycoplasma; D_6__uncultured bacterium	0	0	1	0	1	69	0	0	38	0	0	10	0	0	0	0	5	0	0	0	0	0	0	0	0	1	0	0	0	0	0	0	0	0	0	0	0	0	0	0	0	0	0	0	0	0	1	0
denovo2919	D_0__Bacteria; D_1__Tenericutes; D_2__Mollicutes; D_3__Mycoplasmatales; D_4__Mycoplasmataceae; D_5__Mycoplasma; D_6__uncultured bacterium	0	0	0	0	0	0	0	0	0	4	2	1	0	4	41	1	0	3	32	24	0	0	3	0	10	0	0	0	0	0	0	0	2	0	0	0	0	0	0	0	0	1	0	0	0	0	0	0
denovo1807	D_0__Bacteria; D_1__Tenericutes; D_2__Mollicutes; D_3__Mycoplasmatales; D_4__Mycoplasmataceae; D_5__Mycoplasma; D_6__uncultured bacterium	0	0	0	0	0	0	0	1	0	0	0	0	1	1	1	0	0	0	16	0	1	0	1	5	0	1	0	0	0	0	0	0	0	5	0	4	0	1	2	0	0	0	3	2	2	0	0	0
denovo4007	D_0__Bacteria; D_1__Tenericutes; D_2__Mollicutes; D_3__Mycoplasmatales; D_4__Mycoplasmataceae; D_5__Mycoplasma; D_6__uncultured bacterium	0	0	2	2	0	0	0	3	2	11	0	4	1	6	0	4	0	11	0	73	0	0	0	0	0	0	0	0	8	0	0	0	0	0	0	0	0	0	0	0	0	0	0	0	0	0	0	0
denovo6609	D_0__Bacteria; D_1__Tenericutes; D_2__Mollicutes; D_3__Mycoplasmatales; D_4__Mycoplasmataceae; D_5__Mycoplasma; D_6__uncultured bacterium	0	0	0	0	0	0	0	0	0	0	0	0	0	0	0	0	0	0	0	0	0	0	0	0	0	0	0	0	0	0	0	0	0	0	0	0	31	33	25	16	12	1	0	1	0	0	0	1
denovo121	D_0__Bacteria; D_1__Tenericutes; D_2__Mollicutes; D_3__Mycoplasmatales; D_4__Mycoplasmataceae; D_5__Mycoplasma; D_6__uncultured bacterium	0	0	2	0	0	4	0	0	4	42	0	7	19	1	3	0	11	0	2	0	0	0	0	0	0	0	0	0	0	11	0	0	0	0	18	0	0	0	0	0	0	0	0	0	0	0	0	0
denovo6563	D_0__Bacteria; D_1__Tenericutes; D_2__Mollicutes; D_3__Mycoplasmatales; D_4__Mycoplasmataceae; D_5__Mycoplasma; D_6__uncultured bacterium	0	0	0	0	0	0	0	0	0	0	0	0	0	0	0	0	0	0	0	0	0	0	0	0	0	0	0	0	0	0	0	0	0	3	0	0	41	11	5	35	14	6	0	1	0	1	1	1
denovo5769	D_0__Bacteria; D_1__Tenericutes; D_2__Mollicutes; D_3__Mycoplasmatales; D_4__Mycoplasmataceae; D_5__Mycoplasma; D_6__uncultured bacterium	0	0	1	0	0	0	0	0	0	0	1	10	0	0	0	2	0	0	0	0	3	0	0	0	0	18	0	0	0	0	0	0	0	4	0	0	9	38	0	0	8	8	0	1	0	1	4	1
denovo1759	D_0__Bacteria; D_1__Tenericutes; D_2__Mollicutes; D_3__Mycoplasmatales; D_4__Mycoplasmataceae; D_5__Mycoplasma; D_6__uncultured bacterium	0	0	0	0	0	0	0	0	0	0	0	0	0	0	0	0	0	0	0	0	0	0	0	0	0	0	0	0	0	0	0	0	0	0	4	0	0	0	1	2	1	1	2	19	0	0	0	0
denovo191	D_0__Bacteria; D_1__Tenericutes; D_2__Mollicutes; D_3__Mycoplasmatales; D_4__Mycoplasmataceae; D_5__Mycoplasma; D_6__uncultured bacterium	0	0	0	0	0	0	0	0	0	0	0	0	0	0	0	0	0	0	0	0	0	0	0	0	0	0	0	0	0	0	0	0	0	0	4	0	8	5	2	4	10	7	3	4	0	0	0	6
denovo1541	D_0__Bacteria; D_1__Tenericutes; D_2__Mollicutes; D_3__Mycoplasmatales; D_4__Mycoplasmataceae; D_5__Mycoplasma; D_6__uncultured bacterium	0	0	0	0	0	0	0	0	0	0	0	0	0	0	0	0	0	0	0	0	0	0	0	0	0	0	0	0	0	0	0	0	0	0	6	2	0	0	0	0	1	0	2	1	0	0	0	1
denovo2932	D_0__Bacteria; D_1__Tenericutes; D_2__Mollicutes; D_3__Mycoplasmatales; D_4__Mycoplasmataceae; D_5__Mycoplasma; D_6__uncultured bacterium	0	0	0	3	0	0	1	1	0	3	0	2	0	8	37	0	0	0	40	2	0	0	0	0	6	0	0	0	0	0	0	0	9	0	0	0	1	0	0	0	0	0	0	0	0	0	0	0
denovo2951	D_0__Bacteria; D_1__Tenericutes; D_2__Mollicutes; D_3__Mycoplasmatales; D_4__Mycoplasmataceae; D_5__Mycoplasma; D_6__uncultured bacterium	1	0	0	1	0	1	3	1	3	1	0	0	0	1	31	0	0	1	0	0	0	0	13	1	12	0	0	0	0	0	0	0	36	0	0	1	0	2	0	0	1	0	0	0	0	0	0	1
denovo3521	D_0__Bacteria; D_1__Tenericutes; D_2__Mollicutes; D_3__Mycoplasmatales; D_4__Mycoplasmataceae; D_5__Mycoplasma; D_6__uncultured bacterium	0	0	0	0	0	3	42	0	0	5	0	0	0	1	0	0	5	0	0	1	0	0	13	8	27	4	0	0	0	0	0	0	2	0	0	0	0	0	0	0	0	1	0	0	0	0	0	0
denovo987	D_0__Bacteria; D_1__Tenericutes; D_2__Mollicutes; D_3__Mycoplasmatales; D_4__Mycoplasmataceae; D_5__Mycoplasma; D_6__uncultured bacterium	0	0	0	0	0	0	0	0	0	0	0	0	0	0	0	0	0	0	0	0	0	0	0	1	0	0	0	25	0	5	0	0	0	0	1	0	0	1	0	0	1	1	4	9	0	0	0	0
denovo185	D_0__Bacteria; D_1__Tenericutes; D_2__Mollicutes; D_3__Mycoplasmatales; D_4__Mycoplasmataceae; D_5__Mycoplasma; D_6__uncultured bacterium	0	0	0	0	0	0	0	0	0	0	0	0	0	0	0	0	0	0	0	0	0	0	0	0	0	0	0	0	0	0	0	0	0	0	0	6	0	0	5	0	0	0	5	1	0	0	1	3
denovo1823	D_0__Bacteria; D_1__Tenericutes; D_2__Mollicutes; D_3__Mycoplasmatales; D_4__Mycoplasmataceae; D_5__Mycoplasma; D_6__uncultured bacterium	0	0	0	0	0	0	0	0	0	0	0	0	0	0	0	0	0	0	0	0	0	0	0	0	0	0	0	0	0	0	0	0	0	0	0	2	0	1	0	0	0	0	26	25	1	0	0	0
denovo3722	D_0__Bacteria; D_1__Tenericutes; D_2__Mollicutes; D_3__Mycoplasmatales; D_4__Mycoplasmataceae; D_5__Mycoplasma; D_6__uncultured bacterium	0	0	0	0	0	0	14	0	0	7	0	0	2	2	0	0	0	0	0	4	0	3	64	0	11	0	0	0	0	0	0	0	0	0	0	0	0	1	0	0	0	0	0	0	1	0	0	0
denovo92	D_0__Bacteria; D_1__Tenericutes; D_2__Mollicutes; D_3__Mycoplasmatales; D_4__Mycoplasmataceae; D_5__Mycoplasma; D_6__uncultured bacterium	0	0	0	0	0	0	0	0	0	0	0	0	0	0	0	0	0	0	0	0	0	0	0	0	0	0	0	0	0	0	0	0	0	1	6	1	3	3	6	28	5	0	4	7	0	1	0	7
denovo2953	D_0__Bacteria; D_1__Tenericutes; D_2__Mollicutes; D_3__Mycoplasmatales; D_4__Mycoplasmataceae; D_5__Mycoplasma; D_6__uncultured bacterium	0	0	0	0	0	0	1	0	0	32	0	4	0	0	55	1	0	7	0	4	0	0	0	1	1	0	0	0	1	0	0	0	1	0	0	0	0	0	0	0	0	0	0	0	0	0	0	0
denovo6937	D_0__Bacteria; D_1__Tenericutes; D_2__Mollicutes; D_3__Mycoplasmatales; D_4__Mycoplasmataceae; D_5__Mycoplasma; D_6__uncultured bacterium	0	0	0	0	0	0	0	0	0	0	0	0	0	0	0	0	0	0	0	0	0	0	0	0	0	0	0	0	0	0	0	0	0	1	0	0	0	0	1	81	3	1	0	1	0	0	0	3
denovo72	D_0__Bacteria; D_1__Tenericutes; D_2__Mollicutes; D_3__Mycoplasmatales; D_4__Mycoplasmataceae; D_5__Mycoplasma; D_6__uncultured bacterium	0	0	10	8	1	0	0	4	0	2	0	0	0	4	4	4	0	15	36	0	0	0	12	0	2	0	0	0	0	1	0	0	2	0	0	0	0	0	0	2	0	0	0	0	0	0	0	0
denovo1795	D_0__Bacteria; D_1__Tenericutes; D_2__Mollicutes; D_3__Mycoplasmatales; D_4__Mycoplasmataceae; D_5__Mycoplasma; D_6__uncultured bacterium	0	0	1	4	0	0	0	2	0	0	0	0	0	2	4	1	0	5	10	0	5	0	1	4	0	3	0	0	1	0	0	0	1	10	0	3	1	0	0	0	2	0	3	1	0	0	2	0
denovo1832	D_0__Bacteria; D_1__Tenericutes; D_2__Mollicutes; D_3__Mycoplasmatales; D_4__Mycoplasmataceae; D_5__Mycoplasma; D_6__uncultured bacterium	0	0	0	0	0	0	0	0	0	0	0	0	0	0	0	0	0	0	0	0	1	0	0	0	0	0	0	0	0	0	0	0	0	1	0	2	0	5	0	0	2	0	10	13	0	0	0	1
denovo6700	D_0__Bacteria; D_1__Tenericutes; D_2__Mollicutes; D_3__Mycoplasmatales; D_4__Mycoplasmataceae; D_5__Mycoplasma; D_6__uncultured bacterium	0	0	0	0	0	0	0	0	0	0	0	0	0	0	0	0	0	0	0	0	0	0	0	0	0	0	0	0	0	0	0	0	0	5	0	0	0	44	0	0	26	10	0	0	0	8	1	0
denovo2623	D_0__Bacteria; D_1__Tenericutes; D_2__Mollicutes; D_3__Mycoplasmatales; D_4__Mycoplasmataceae; D_5__Mycoplasma; D_6__uncultured bacterium	0	0	0	0	0	0	0	1	1	3	0	2	34	0	7	0	0	3	39	12	0	0	0	0	0	0	0	0	1	0	0	0	1	0	0	0	0	0	0	0	0	0	0	0	0	0	0	0
denovo6548	D_0__Bacteria; D_1__Tenericutes; D_2__Mollicutes; D_3__Mycoplasmatales; D_4__Mycoplasmataceae; D_5__Mycoplasma; D_6__uncultured bacterium	0	0	0	0	0	0	0	0	0	0	0	0	0	0	0	0	0	0	0	0	0	0	0	0	0	0	0	0	0	0	0	0	0	1	0	0	64	5	23	0	3	1	0	1	0	0	2	0
denovo208	D_0__Bacteria; D_1__Tenericutes; D_2__Mollicutes; D_3__Mycoplasmatales; D_4__Mycoplasmataceae; D_5__Mycoplasma; D_6__uncultured bacterium	0	0	0	0	0	0	0	0	0	0	0	0	0	0	0	0	0	0	0	0	8	0	0	0	0	0	0	0	0	0	0	0	0	0	5	0	1	3	0	7	11	6	7	11	0	0	0	10
denovo1603	D_0__Bacteria; D_1__Tenericutes; D_2__Mollicutes; D_3__Mycoplasmatales; D_4__Mycoplasmataceae; D_5__Mycoplasma; D_6__uncultured bacterium	0	0	0	0	0	0	0	0	0	0	0	0	0	0	0	0	0	0	10	0	0	0	0	0	0	0	0	0	0	0	0	0	1	0	24	3	0	0	0	0	0	0	17	3	0	0	0	0
denovo5390	D_0__Bacteria; D_1__Tenericutes; D_2__Mollicutes; D_3__Mycoplasmatales; D_4__Mycoplasmataceae; D_5__Mycoplasma; D_6__uncultured bacterium	0	3	14	0	2	0	0	22	3	0	0	3	0	0	0	15	0	0	0	0	0	0	0	0	0	31	0	0	0	0	5	0	0	0	0	0	1	0	0	0	0	1	0	0	0	0	0	0
denovo184	D_0__Bacteria; D_1__Tenericutes; D_2__Mollicutes; D_3__Mycoplasmatales; D_4__Mycoplasmataceae; D_5__Mycoplasma; D_6__uncultured bacterium	0	0	0	0	0	0	0	0	0	0	0	0	1	0	1	4	0	17	20	0	0	0	7	0	0	7	0	3	0	0	14	2	8	0	0	1	0	0	0	0	0	0	10	1	0	0	0	0
denovo2699	D_0__Bacteria; D_1__Tenericutes; D_2__Mollicutes; D_3__Mycoplasmatales; D_4__Mycoplasmataceae; D_5__Mycoplasma; D_6__uncultured bacterium	0	1	1	3	0	3	10	0	1	10	0	2	9	1	10	0	3	0	25	0	0	0	6	2	0	0	0	0	0	0	0	0	2	0	0	1	0	0	0	0	0	0	0	0	0	0	0	0
denovo192	D_0__Bacteria; D_1__Tenericutes; D_2__Mollicutes; D_3__Mycoplasmatales; D_4__Mycoplasmataceae; D_5__Mycoplasma; D_6__uncultured bacterium	1	0	0	0	0	1	11	0	1	6	0	1	7	0	1	0	4	1	3	0	0	0	5	5	15	0	0	1	0	1	0	0	8	0	2	4	0	3	0	0	1	3	0	0	0	0	0	0
denovo6607	D_0__Bacteria; D_1__Tenericutes; D_2__Mollicutes; D_3__Mycoplasmatales; D_4__Mycoplasmataceae; D_5__Mycoplasma; D_6__uncultured bacterium	0	0	0	0	0	0	0	0	0	0	0	0	0	0	0	0	0	0	0	0	0	0	0	0	0	0	0	0	0	0	0	0	0	1	0	0	30	4	13	5	20	19	0	0	0	0	0	2
denovo3272	D_0__Bacteria; D_1__Tenericutes; D_2__Mollicutes; D_3__Mycoplasmatales; D_4__Mycoplasmataceae; D_5__Mycoplasma; D_6__uncultured bacterium	0	0	0	0	0	0	2	5	0	4	0	1	0	8	0	0	1	3	0	10	0	0	8	7	11	0	0	0	0	0	0	0	12	3	0	1	0	11	0	0	1	1	0	0	3	0	0	0
denovo1678	D_0__Bacteria; D_1__Tenericutes; D_2__Mollicutes; D_3__Mycoplasmatales; D_4__Mycoplasmataceae; D_5__Mycoplasma; D_6__uncultured bacterium	0	0	0	0	0	0	0	0	0	0	0	0	0	0	0	0	0	0	0	0	0	0	0	0	0	0	0	0	0	0	0	0	0	0	37	0	2	0	0	0	2	0	4	5	0	0	0	0
denovo3436	D_0__Bacteria; D_1__Tenericutes; D_2__Mollicutes; D_3__Mycoplasmatales; D_4__Mycoplasmataceae; D_5__Mycoplasma; D_6__uncultured bacterium	0	0	0	0	0	0	0	0	0	2	0	0	0	0	0	1	0	0	0	0	0	2	7	1	26	0	0	0	0	0	0	0	50	0	0	0	0	1	0	0	0	1	0	0	0	0	0	0
denovo4234	D_0__Bacteria; D_1__Tenericutes; D_2__Mollicutes; D_3__Mycoplasmatales; D_4__Mycoplasmataceae; D_5__Mycoplasma; D_6__uncultured bacterium	0	1	0	1	2	0	0	5	0	0	0	0	0	8	0	6	1	44	0	0	0	0	0	0	0	20	0	0	0	0	0	0	0	0	0	0	0	0	0	0	0	0	0	0	1	0	0	0
denovo7406	D_0__Bacteria; D_1__Tenericutes; D_2__Mollicutes; D_3__Mycoplasmatales; D_4__Mycoplasmataceae; D_5__Mycoplasma; D_6__uncultured bacterium	0	0	0	0	0	0	0	0	0	0	0	0	0	0	0	0	0	0	0	0	0	0	0	0	0	0	0	0	0	0	0	0	0	0	0	0	0	0	1	0	0	25	0	0	0	3	3	0
denovo1303	D_0__Bacteria; D_1__Tenericutes; D_2__Mollicutes; D_3__Mycoplasmatales; D_4__Mycoplasmataceae; D_5__Mycoplasma; D_6__uncultured bacterium	0	1	2	0	0	0	0	0	1	1	0	0	3	0	8	0	0	7	36	2	0	0	0	0	0	0	0	0	3	21	0	0	0	0	0	0	0	0	0	0	0	0	0	0	0	0	0	0
denovo6560	D_0__Bacteria; D_1__Tenericutes; D_2__Mollicutes; D_3__Mycoplasmatales; D_4__Mycoplasmataceae; D_5__Mycoplasma; D_6__uncultured bacterium	0	0	0	0	0	0	0	0	0	0	0	0	0	0	0	0	0	0	0	0	0	0	0	0	0	0	0	0	0	0	0	0	0	3	0	0	16	5	24	16	12	0	0	1	0	0	2	0
denovo217	D_0__Bacteria; D_1__Tenericutes; D_2__Mollicutes; D_3__Mycoplasmatales; D_4__Mycoplasmataceae; D_5__Mycoplasma; D_6__uncultured bacterium	0	0	0	0	0	0	0	1	0	3	0	0	1	0	10	1	0	18	37	3	0	0	0	0	3	0	0	0	1	2	0	0	0	0	0	0	0	0	0	0	0	2	0	0	0	0	0	0
denovo3432	D_0__Bacteria; D_1__Tenericutes; D_2__Mollicutes; D_3__Mycoplasmatales; D_4__Mycoplasmataceae; D_5__Mycoplasma; D_6__uncultured bacterium	0	0	1	4	1	0	7	0	0	0	0	0	0	0	0	2	0	0	0	0	0	0	3	1	2	4	0	0	3	0	0	0	51	0	0	0	0	1	0	0	0	0	0	0	1	0	0	0
denovo2637	D_0__Bacteria; D_1__Tenericutes; D_2__Mollicutes; D_3__Mycoplasmatales; D_4__Mycoplasmataceae; D_5__Mycoplasma; D_6__uncultured bacterium	0	2	0	0	0	0	0	0	0	2	0	0	13	3	16	0	0	0	26	2	0	0	3	0	1	0	0	0	0	0	0	0	1	1	0	3	0	6	0	0	1	0	0	0	1	0	0	0
denovo120	D_0__Bacteria; D_1__Tenericutes; D_2__Mollicutes; D_3__Mycoplasmatales; D_4__Mycoplasmataceae; D_5__Mycoplasma; D_6__uncultured bacterium	0	1	1	4	0	0	0	3	2	0	0	1	0	3	1	9	2	8	19	2	0	0	7	0	3	6	0	0	0	0	0	0	5	1	0	1	0	0	0	0	0	0	0	0	0	0	0	0
denovo6514	D_0__Bacteria; D_1__Tenericutes; D_2__Mollicutes; D_3__Mycoplasmatales; D_4__Mycoplasmataceae; D_5__Mycoplasma; D_6__uncultured bacterium	0	0	0	0	0	0	0	0	0	0	0	0	0	0	0	0	0	0	0	0	0	0	0	0	0	0	0	0	0	0	0	0	0	0	0	0	27	1	27	15	4	1	0	0	0	0	1	0
denovo268	D_0__Bacteria; D_1__Tenericutes; D_2__Mollicutes; D_3__Mycoplasmatales; D_4__Mycoplasmataceae; D_5__Mycoplasma; D_6__uncultured bacterium	0	0	0	0	0	0	0	0	0	0	0	0	0	0	1	0	0	0	0	0	0	0	0	0	0	0	0	0	0	4	0	0	0	0	5	3	1	0	27	10	7	1	8	2	0	0	0	0
denovo2895	D_0__Bacteria; D_1__Tenericutes; D_2__Mollicutes; D_3__Mycoplasmatales; D_4__Mycoplasmataceae; D_5__Mycoplasma; D_6__uncultured bacterium	0	0	2	6	0	0	0	1	1	0	0	0	0	0	23	1	0	2	11	0	0	0	4	0	2	3	0	0	0	0	0	0	19	0	0	1	0	0	0	0	1	0	0	0	0	0	0	1
denovo2941	D_0__Bacteria; D_1__Tenericutes; D_2__Mollicutes; D_3__Mycoplasmatales; D_4__Mycoplasmataceae; D_5__Mycoplasma; D_6__uncultured bacterium	0	0	0	0	0	0	1	0	0	1	0	0	0	0	7	0	0	1	3	3	0	0	1	0	46	0	0	0	0	0	0	0	9	0	0	0	1	0	0	0	1	0	0	0	0	0	0	0
denovo980	D_0__Bacteria; D_1__Tenericutes; D_2__Mollicutes; D_3__Mycoplasmatales; D_4__Mycoplasmataceae; D_5__Mycoplasma; D_6__uncultured bacterium	0	0	0	0	0	0	0	0	0	1	2	0	4	6	12	0	0	2	6	4	0	0	0	0	1	0	0	0	3	35	0	0	0	0	0	0	0	0	0	0	0	0	0	0	0	0	0	0
denovo2632	D_0__Bacteria; D_1__Tenericutes; D_2__Mollicutes; D_3__Mycoplasmatales; D_4__Mycoplasmataceae; D_5__Mycoplasma; D_6__uncultured bacterium	0	0	1	0	0	0	1	0	0	0	1	1	4	0	15	1	0	0	40	0	0	1	2	0	2	0	0	0	0	0	0	0	1	0	0	2	0	2	0	0	0	1	0	0	0	0	0	0
denovo3475	D_0__Bacteria; D_1__Tenericutes; D_2__Mollicutes; D_3__Mycoplasmatales; D_4__Mycoplasmataceae; D_5__Mycoplasma; D_6__uncultured bacterium	0	0	0	3	0	0	0	0	0	1	0	1	0	0	0	0	0	4	0	0	0	0	1	0	8	0	0	0	0	0	0	1	52	0	0	0	1	1	0	0	1	0	0	0	0	0	0	0
denovo1569	D_0__Bacteria; D_1__Tenericutes; D_2__Mollicutes; D_3__Mycoplasmatales; D_4__Mycoplasmataceae; D_5__Mycoplasma; D_6__uncultured bacterium	0	0	0	0	0	0	0	0	0	0	0	0	0	0	5	0	0	0	11	1	0	0	2	1	0	0	0	0	0	0	0	0	0	0	17	0	0	1	0	0	0	1	3	0	0	0	0	0
denovo3552	D_0__Bacteria; D_1__Tenericutes; D_2__Mollicutes; D_3__Mycoplasmatales; D_4__Mycoplasmataceae; D_5__Mycoplasma; D_6__uncultured bacterium	1	0	0	1	0	0	4	0	0	6	0	0	0	0	0	0	0	2	0	4	0	0	11	5	34	0	0	0	0	0	0	0	2	0	0	0	0	0	0	0	1	0	0	0	0	0	0	0
denovo6619	D_0__Bacteria; D_1__Tenericutes; D_2__Mollicutes; D_3__Mycoplasmatales; D_4__Mycoplasmataceae; D_5__Mycoplasma; D_6__uncultured bacterium	0	0	0	0	0	0	0	0	0	0	0	0	0	0	0	0	0	0	0	0	0	0	0	0	0	0	0	0	0	0	0	0	0	1	0	0	4	9	0	13	32	3	0	0	0	0	0	3
denovo6626	D_0__Bacteria; D_1__Tenericutes; D_2__Mollicutes; D_3__Mycoplasmatales; D_4__Mycoplasmataceae; D_5__Mycoplasma; D_6__uncultured bacterium	0	1	4	0	0	0	0	0	0	0	0	0	0	0	0	0	0	0	0	0	0	0	0	0	0	0	0	0	0	0	0	5	0	1	0	0	3	0	3	9	8	3	0	4	0	2	0	2
denovo6797	D_0__Bacteria; D_1__Tenericutes; D_2__Mollicutes; D_3__Mycoplasmatales; D_4__Mycoplasmataceae; D_5__Mycoplasma; D_6__uncultured bacterium	0	0	0	0	0	0	0	0	0	0	0	0	0	0	0	0	0	0	0	0	0	0	0	0	0	0	0	0	0	0	0	0	0	5	0	0	0	0	0	49	1	1	0	0	0	0	0	1
denovo3617	D_0__Bacteria; D_1__Tenericutes; D_2__Mollicutes; D_3__Mycoplasmatales; D_4__Mycoplasmataceae; D_5__Mycoplasma; D_6__uncultured bacterium	0	0	0	2	1	0	0	2	3	4	0	4	0	2	0	7	0	41	0	2	0	0	1	0	0	0	0	0	2	0	0	0	0	0	0	0	0	0	0	0	0	0	0	0	0	0	0	0
denovo2377	D_0__Bacteria; D_1__Tenericutes; D_2__Mollicutes; D_3__Mycoplasmatales; D_4__Mycoplasmataceae; D_5__Mycoplasma; D_6__uncultured bacterium	0	0	0	0	0	0	0	0	0	0	0	0	0	0	0	0	0	0	0	0	0	1	0	24	0	0	0	0	0	0	0	0	0	0	0	0	2	2	1	6	5	0	0	0	1	1	0	4
denovo5889	D_0__Bacteria; D_1__Tenericutes; D_2__Mollicutes; D_3__Mycoplasmatales; D_4__Mycoplasmataceae; D_5__Mycoplasma; D_6__uncultured bacterium	0	0	0	0	0	0	0	0	0	0	0	3	0	0	0	0	0	0	0	0	1	0	0	0	0	0	0	0	0	0	0	0	0	8	0	0	5	31	0	0	4	4	0	2	0	0	2	0
denovo259	D_0__Bacteria; D_1__Tenericutes; D_2__Mollicutes; D_3__Mycoplasmatales; D_4__Mycoplasmataceae; D_5__Mycoplasma; D_6__uncultured bacterium	0	0	1	0	0	0	1	0	0	2	0	0	2	0	5	0	0	0	8	0	0	0	2	1	0	0	0	0	0	0	0	0	0	0	12	0	2	7	0	0	2	5	1	1	1	1	0	0
denovo4501	D_0__Bacteria; D_1__Tenericutes; D_2__Mollicutes; D_3__Mycoplasmatales; D_4__Mycoplasmataceae; D_5__Mycoplasma; D_6__uncultured bacterium	0	0	2	17	1	0	0	10	1	0	0	0	0	13	0	1	0	0	0	0	0	0	0	0	0	10	0	0	0	0	0	0	0	1	0	0	7	0	0	0	2	1	0	1	0	0	0	0
denovo6881	D_0__Bacteria; D_1__Tenericutes; D_2__Mollicutes; D_3__Mycoplasmatales; D_4__Mycoplasmataceae; D_5__Mycoplasma; D_6__uncultured bacterium	0	0	0	0	0	0	0	0	0	0	0	0	0	0	0	0	0	0	0	0	0	0	0	0	0	0	0	0	0	0	0	0	0	11	0	0	0	0	2	28	0	3	0	2	0	0	3	1
denovo3433	D_0__Bacteria; D_1__Tenericutes; D_2__Mollicutes; D_3__Mycoplasmatales; D_4__Mycoplasmataceae; D_5__Mycoplasma; D_6__uncultured bacterium	0	0	8	15	1	0	0	2	0	0	0	0	0	5	0	4	2	2	0	1	0	0	4	0	1	4	0	0	0	0	0	0	19	0	0	0	0	0	0	0	0	0	0	0	0	0	0	0
denovo6962	D_0__Bacteria; D_1__Tenericutes; D_2__Mollicutes; D_3__Mycoplasmatales; D_4__Mycoplasmataceae; D_5__Mycoplasma; D_6__uncultured bacterium	0	0	0	0	0	0	0	0	0	0	0	0	0	0	0	0	0	0	0	0	0	0	0	0	0	0	0	0	0	0	0	0	0	0	0	0	0	0	4	30	2	6	0	0	0	0	3	3
denovo1582	D_0__Bacteria; D_1__Tenericutes; D_2__Mollicutes; D_3__Mycoplasmatales; D_4__Mycoplasmataceae; D_5__Mycoplasma; D_6__uncultured bacterium	0	0	0	0	0	0	0	0	0	0	0	0	0	0	0	0	0	0	0	0	0	0	0	0	0	0	0	0	0	0	0	0	0	0	3	0	0	0	0	1	1	1	2	2	0	0	0	0
denovo1773	D_0__Bacteria; D_1__Tenericutes; D_2__Mollicutes; D_3__Mycoplasmatales; D_4__Mycoplasmataceae; D_5__Mycoplasma; D_6__uncultured bacterium	0	0	0	0	0	0	0	0	0	0	0	0	0	0	0	0	0	0	0	0	0	0	0	0	0	0	0	0	0	0	0	0	0	0	8	0	1	0	0	0	1	0	1	3	0	0	1	3
denovo2753	D_0__Bacteria; D_1__Tenericutes; D_2__Mollicutes; D_3__Mycoplasmatales; D_4__Mycoplasmataceae; D_5__Mycoplasma; D_6__uncultured bacterium	0	0	0	0	0	0	0	0	0	0	0	0	0	0	0	0	0	0	0	0	0	4	0	36	0	0	4	0	0	0	0	0	0	0	0	6	1	0	1	0	1	0	0	0	2	0	0	0
denovo6503	D_0__Bacteria; D_1__Tenericutes; D_2__Mollicutes; D_3__Mycoplasmatales; D_4__Mycoplasmataceae; D_5__Mycoplasma; D_6__uncultured bacterium	0	0	0	0	0	0	0	0	0	0	0	0	0	0	0	0	0	0	0	0	0	0	0	0	0	0	0	0	0	0	0	0	0	1	0	0	31	5	8	1	3	7	0	0	0	0	0	3
denovo5379	D_0__Bacteria; D_1__Tenericutes; D_2__Mollicutes; D_3__Mycoplasmatales; D_4__Mycoplasmataceae; D_5__Mycoplasma; D_6__uncultured bacterium	0	0	0	0	5	9	0	14	9	0	1	2	0	0	0	6	0	0	0	0	0	0	0	0	0	9	0	0	0	0	0	0	0	0	0	0	0	2	0	0	0	2	0	0	0	0	0	0
denovo1319	D_0__Bacteria; D_1__Tenericutes; D_2__Mollicutes; D_3__Mycoplasmatales; D_4__Mycoplasmataceae; D_5__Mycoplasma; D_6__uncultured bacterium	0	0	0	0	0	0	0	1	4	0	1	2	7	2	3	0	0	0	2	2	0	0	0	0	0	0	0	0	0	36	0	0	0	0	0	0	0	0	0	0	0	0	0	0	0	0	0	0
denovo1606	D_0__Bacteria; D_1__Tenericutes; D_2__Mollicutes; D_3__Mycoplasmatales; D_4__Mycoplasmataceae; D_5__Mycoplasma; D_6__uncultured bacterium	0	0	0	0	0	0	0	0	0	0	0	0	0	0	0	0	0	0	0	0	0	0	0	0	0	0	0	0	0	0	0	0	0	0	21	1	0	7	0	0	0	0	9	3	0	0	0	0
denovo2936	D_0__Bacteria; D_1__Tenericutes; D_2__Mollicutes; D_3__Mycoplasmatales; D_4__Mycoplasmataceae; D_5__Mycoplasma; D_6__uncultured bacterium	0	0	0	4	0	0	0	1	0	0	0	0	0	2	5	2	0	2	26	1	0	0	2	2	1	2	0	0	0	0	0	0	3	0	0	0	0	0	0	0	1	0	0	0	0	1	0	0
denovo1066	D_0__Bacteria; D_1__Tenericutes; D_2__Mollicutes; D_3__Mycoplasmatales; D_4__Mycoplasmataceae; D_5__Mycoplasma; D_6__uncultured bacterium	0	0	0	0	0	0	0	0	0	0	0	0	0	0	0	0	0	0	0	0	0	0	0	2	0	0	0	27	0	5	0	0	0	0	2	0	0	0	0	1	0	0	0	0	0	0	0	0
denovo1581	D_0__Bacteria; D_1__Tenericutes; D_2__Mollicutes; D_3__Mycoplasmatales; D_4__Mycoplasmataceae; D_5__Mycoplasma; D_6__uncultured bacterium	0	0	0	0	0	0	0	0	0	0	0	0	0	0	0	0	0	0	0	0	0	0	0	0	0	0	0	0	0	0	0	0	0	0	2	0	1	0	1	1	3	2	0	2	0	0	0	3
denovo2243	D_0__Bacteria; D_1__Tenericutes; D_2__Mollicutes; D_3__Mycoplasmatales; D_4__Mycoplasmataceae; D_5__Mycoplasma; D_6__uncultured bacterium	0	0	0	0	0	1	0	0	0	0	0	0	5	0	0	0	2	0	6	0	0	0	0	2	1	3	0	0	0	0	0	0	18	0	0	7	1	0	0	0	0	0	13	0	0	0	0	0
denovo3692	D_0__Bacteria; D_1__Tenericutes; D_2__Mollicutes; D_3__Mycoplasmatales; D_4__Mycoplasmataceae; D_5__Mycoplasma; D_6__uncultured bacterium	0	0	0	0	0	0	1	0	0	36	0	1	2	0	0	0	0	4	0	7	0	0	2	0	3	0	0	0	1	0	0	0	1	0	0	0	0	0	0	0	0	0	0	0	0	0	0	0
denovo920	D_0__Bacteria; D_1__Tenericutes; D_2__Mollicutes; D_3__Mycoplasmatales; D_4__Mycoplasmataceae; D_5__Mycoplasma; D_6__uncultured bacterium	0	0	0	0	0	0	0	0	0	0	0	0	0	0	0	0	0	0	0	0	0	0	0	0	0	0	0	6	0	0	0	0	0	0	6	0	0	1	0	1	0	0	5	2	0	0	0	0
denovo271	D_0__Bacteria; D_1__Tenericutes; D_2__Mollicutes; D_3__Mycoplasmatales; D_4__Mycoplasmataceae; D_5__Mycoplasma; D_6__uncultured bacterium	0	0	0	0	0	0	0	0	0	0	0	0	0	0	0	0	0	1	7	0	0	0	1	0	0	0	0	0	0	0	0	0	5	0	1	3	1	0	4	0	6	0	12	3	1	0	0	0
denovo3016	D_0__Bacteria; D_1__Tenericutes; D_2__Mollicutes; D_3__Mycoplasmatales; D_4__Mycoplasmataceae; D_5__Mycoplasma; D_6__uncultured bacterium	0	0	1	0	0	0	0	0	0	2	0	0	0	0	0	0	0	18	0	0	0	0	3	0	9	0	0	0	0	0	1	0	9	0	0	5	1	0	0	0	0	1	0	0	3	0	0	0
denovo60	D_0__Bacteria; D_1__Tenericutes; D_2__Mollicutes; D_3__Mycoplasmatales; D_4__Mycoplasmataceae; D_5__Mycoplasma; D_6__uncultured bacterium	0	0	0	0	0	1	6	0	0	4	0	1	0	0	0	0	0	0	0	0	0	0	0	0	0	0	0	0	0	0	0	0	0	1	11	0	0	4	0	0	1	0	1	0	0	0	0	0
denovo178	D_0__Bacteria; D_1__Tenericutes; D_2__Mollicutes; D_3__Mycoplasmatales; D_4__Mycoplasmataceae; D_5__Mycoplasma; D_6__uncultured bacterium	0	0	0	0	0	0	0	0	0	0	0	0	0	0	0	1	0	0	0	0	0	0	0	0	0	0	0	0	0	0	0	0	0	0	0	0	1	0	1	0	0	0	1	0	0	0	0	3
denovo2811	D_0__Bacteria; D_1__Tenericutes; D_2__Mollicutes; D_3__Mycoplasmatales; D_4__Mycoplasmataceae; D_5__Mycoplasma; D_6__uncultured bacterium	0	0	0	0	0	0	0	0	2	0	0	0	34	1	2	0	0	2	4	3	0	0	1	0	1	0	0	0	2	0	0	0	0	0	0	0	0	0	0	0	0	0	0	0	0	0	0	0
denovo3573	D_0__Bacteria; D_1__Tenericutes; D_2__Mollicutes; D_3__Mycoplasmatales; D_4__Mycoplasmataceae; D_5__Mycoplasma; D_6__uncultured bacterium	0	0	1	9	2	0	0	1	0	1	0	0	0	4	0	1	0	3	0	2	0	0	8	0	1	7	0	0	1	0	0	0	6	1	0	0	3	0	0	0	0	0	0	0	1	0	0	0
denovo6681	D_0__Bacteria; D_1__Tenericutes; D_2__Mollicutes; D_3__Mycoplasmatales; D_4__Mycoplasmataceae; D_5__Mycoplasma; D_6__uncultured bacterium	0	1	0	0	0	0	0	0	0	0	0	0	0	0	0	0	0	0	0	0	1	0	0	0	0	0	0	0	0	0	0	0	0	0	0	0	0	31	0	0	8	5	0	2	0	0	0	0
denovo1876	D_0__Bacteria; D_1__Tenericutes; D_2__Mollicutes; D_3__Mycoplasmatales; D_4__Mycoplasmataceae; D_5__Mycoplasma; D_6__uncultured bacterium	0	0	0	0	0	0	0	0	0	0	0	0	0	0	0	0	0	0	0	0	0	0	0	0	0	0	0	0	0	0	0	0	0	0	0	0	0	1	0	1	0	0	2	4	0	0	0	1
denovo4590	D_0__Bacteria; D_1__Tenericutes; D_2__Mollicutes; D_3__Mycoplasmatales; D_4__Mycoplasmataceae; D_5__Mycoplasma; D_6__uncultured bacterium	0	0	0	0	0	0	0	0	0	0	0	0	0	0	0	0	0	0	0	0	0	0	0	0	0	0	0	0	0	0	0	0	0	0	0	0	0	1	0	0	0	0	0	0	0	0	1	0
denovo4918	D_0__Bacteria; D_1__Tenericutes; D_2__Mollicutes; D_3__Mycoplasmatales; D_4__Mycoplasmataceae; D_5__Mycoplasma; D_6__uncultured bacterium	5	0	0	7	1	0	0	0	0	0	0	0	0	14	0	1	4	0	0	0	0	0	0	0	0	6	0	0	0	0	0	0	0	3	0	0	0	5	0	0	1	1	0	0	0	0	1	0
denovo7210	D_0__Bacteria; D_1__Tenericutes; D_2__Mollicutes; D_3__Mycoplasmatales; D_4__Mycoplasmataceae; D_5__Mycoplasma; D_6__uncultured bacterium	0	0	0	0	0	0	0	0	0	0	0	0	0	0	0	0	0	0	0	0	0	0	0	0	0	0	0	0	0	0	0	0	0	3	0	0	0	0	0	0	6	9	0	7	0	9	2	0
denovo1635	D_0__Bacteria; D_1__Tenericutes; D_2__Mollicutes; D_3__Mycoplasmatales; D_4__Mycoplasmataceae; D_5__Mycoplasma; D_6__uncultured bacterium	0	0	0	0	0	0	0	0	0	0	0	0	0	0	0	0	0	0	0	0	0	0	0	0	0	0	0	0	0	0	0	0	0	0	12	9	0	0	3	0	2	3	4	1	0	3	0	1
denovo2570	D_0__Bacteria; D_1__Tenericutes; D_2__Mollicutes; D_3__Mycoplasmatales; D_4__Mycoplasmataceae; D_5__Mycoplasma; D_6__uncultured bacterium	0	0	0	0	0	0	0	1	1	0	0	0	0	0	5	0	0	16	20	1	0	0	2	0	0	1	0	0	0	0	0	0	1	0	0	1	0	0	0	0	0	0	0	0	0	0	0	0
denovo6623	D_0__Bacteria; D_1__Tenericutes; D_2__Mollicutes; D_3__Mycoplasmatales; D_4__Mycoplasmataceae; D_5__Mycoplasma; D_6__uncultured bacterium	0	0	0	0	0	0	0	0	0	0	0	0	0	0	0	0	0	0	0	0	0	0	0	0	0	0	0	0	0	0	0	0	0	0	0	0	4	20	4	2	10	0	0	0	0	0	3	2
denovo118	D_0__Bacteria; D_1__Tenericutes; D_2__Mollicutes; D_3__Mycoplasmatales; D_4__Mycoplasmataceae; D_5__Mycoplasma; D_6__uncultured bacterium	0	0	0	0	0	0	0	0	0	1	5	0	1	0	4	0	0	0	2	19	0	0	0	0	4	0	0	0	0	5	0	0	5	0	1	0	0	0	0	0	0	1	0	0	0	0	0	0
denovo1259	D_0__Bacteria; D_1__Tenericutes; D_2__Mollicutes; D_3__Mycoplasmatales; D_4__Mycoplasmataceae; D_5__Mycoplasma; D_6__uncultured bacterium	0	0	0	0	0	0	0	0	0	0	0	0	0	0	0	0	0	0	0	0	0	0	0	0	0	0	0	6	0	4	0	0	0	1	3	0	0	3	0	0	1	0	4	2	0	0	0	0
denovo255	D_0__Bacteria; D_1__Tenericutes; D_2__Mollicutes; D_3__Mycoplasmatales; D_4__Mycoplasmataceae; D_5__Mycoplasma; D_6__uncultured bacterium	0	0	0	1	0	0	0	1	0	0	0	1	1	2	0	6	0	1	24	1	0	0	1	0	0	1	0	1	0	1	0	0	1	0	1	0	0	0	0	0	0	0	1	3	0	0	0	0
denovo1500	D_0__Bacteria; D_1__Tenericutes; D_2__Mollicutes; D_3__Mycoplasmatales; D_4__Mycoplasmataceae; D_5__Mycoplasma; D_6__uncultured bacterium	0	0	0	0	0	0	0	0	0	0	0	0	0	0	0	0	0	0	0	0	0	0	0	0	0	0	0	0	0	0	0	0	0	0	2	2	0	0	0	0	0	0	8	5	5	0	2	0
denovo3019	D_0__Bacteria; D_1__Tenericutes; D_2__Mollicutes; D_3__Mycoplasmatales; D_4__Mycoplasmataceae; D_5__Mycoplasma; D_6__uncultured bacterium	0	0	0	0	0	0	0	0	0	0	0	0	0	0	0	0	0	0	0	0	0	0	0	0	0	0	0	0	0	0	0	0	0	0	0	1	3	1	0	13	7	0	0	0	0	5	0	4
denovo6073	D_0__Bacteria; D_1__Tenericutes; D_2__Mollicutes; D_3__Mycoplasmatales; D_4__Mycoplasmataceae; D_5__Mycoplasma; D_6__uncultured bacterium	0	4	5	0	0	0	0	0	0	0	0	6	0	0	0	0	0	0	0	0	0	0	0	0	0	0	0	0	0	0	3	0	0	1	0	0	5	1	10	0	3	0	0	3	0	0	0	0
denovo1508	D_0__Bacteria; D_1__Tenericutes; D_2__Mollicutes; D_3__Mycoplasmatales; D_4__Mycoplasmataceae; D_5__Mycoplasma; D_6__uncultured bacterium	0	0	1	1	0	0	0	0	0	0	0	0	0	0	0	0	1	1	1	0	0	0	0	0	0	1	0	0	0	0	0	0	0	0	3	0	0	0	0	0	0	0	22	5	0	0	0	0
denovo6985	D_0__Bacteria; D_1__Tenericutes; D_2__Mollicutes; D_3__Mycoplasmatales; D_4__Mycoplasmataceae; D_5__Mycoplasma; D_6__uncultured bacterium	0	0	0	0	0	0	0	0	0	0	0	0	0	0	0	0	0	0	0	0	1	0	0	0	0	0	0	0	0	0	0	0	0	0	0	0	0	0	0	1	5	5	0	1	0	1	1	5
denovo1720	D_0__Bacteria; D_1__Tenericutes; D_2__Mollicutes; D_3__Mycoplasmatales; D_4__Mycoplasmataceae; D_5__Mycoplasma; D_6__uncultured bacterium	0	0	0	0	0	0	0	0	0	0	0	0	0	0	1	0	0	0	1	0	0	0	0	0	0	0	0	0	0	0	1	0	11	0	5	0	0	0	0	0	0	0	5	2	0	0	0	2
denovo301	D_0__Bacteria; D_1__Tenericutes; D_2__Mollicutes; D_3__Mycoplasmatales; D_4__Mycoplasmataceae; D_5__Mycoplasma; D_6__uncultured bacterium	0	0	0	0	0	0	0	0	0	0	0	0	0	0	0	0	0	0	0	0	0	0	0	0	0	0	0	0	0	0	0	0	0	0	0	9	0	0	1	1	0	1	15	3	2	0	2	1
denovo1636	D_0__Bacteria; D_1__Tenericutes; D_2__Mollicutes; D_3__Mycoplasmatales; D_4__Mycoplasmataceae; D_5__Mycoplasma; D_6__uncultured bacterium	0	0	0	0	0	0	0	0	0	0	0	0	0	0	0	0	0	0	0	0	0	0	0	0	0	0	0	0	0	0	0	0	0	0	15	0	0	0	0	0	0	0	11	1	1	0	0	0
denovo6760	D_0__Bacteria; D_1__Tenericutes; D_2__Mollicutes; D_3__Mycoplasmatales; D_4__Mycoplasmataceae; D_5__Mycoplasma; D_6__uncultured bacterium	0	0	0	0	0	0	0	0	0	0	0	0	0	0	0	0	0	0	0	0	0	0	0	0	0	0	0	0	0	0	0	0	0	0	0	0	0	5	5	5	4	0	0	1	0	2	0	6
denovo285	D_0__Bacteria; D_1__Tenericutes; D_2__Mollicutes; D_3__Mycoplasmatales; D_4__Mycoplasmataceae; D_5__Mycoplasma; D_6__uncultured bacterium	0	0	0	0	0	0	0	0	0	0	0	0	0	0	0	1	0	0	0	0	0	0	0	2	0	0	0	2	1	0	0	0	0	0	3	0	0	0	1	0	0	0	2	1	0	0	0	0
denovo4589	D_0__Bacteria; D_1__Tenericutes; D_2__Mollicutes; D_3__Mycoplasmatales; D_4__Mycoplasmataceae; D_5__Mycoplasma; D_6__uncultured bacterium	0	0	0	0	0	0	0	0	0	0	0	0	0	0	0	0	0	0	0	0	0	0	0	0	0	0	0	0	0	0	0	0	0	0	0	0	2	1	1	3	4	2	0	0	0	0	0	1
denovo1639	D_0__Bacteria; D_1__Tenericutes; D_2__Mollicutes; D_3__Mycoplasmatales; D_4__Mycoplasmataceae; D_5__Mycoplasma; D_6__uncultured bacterium	0	0	0	0	0	0	0	0	0	0	0	0	0	0	0	0	0	0	0	0	0	0	0	0	0	0	0	0	0	0	0	0	0	0	22	0	0	1	1	0	0	0	4	3	0	1	0	0
denovo2942	D_0__Bacteria; D_1__Tenericutes; D_2__Mollicutes; D_3__Mycoplasmatales; D_4__Mycoplasmataceae; D_5__Mycoplasma; D_6__uncultured bacterium	0	0	0	0	1	0	0	1	0	1	0	0	0	2	6	0	0	21	1	0	0	0	2	0	2	0	0	0	0	0	0	1	2	0	0	0	0	0	0	0	0	0	0	0	0	0	0	0
denovo7011	D_0__Bacteria; D_1__Tenericutes; D_2__Mollicutes; D_3__Mycoplasmatales; D_4__Mycoplasmataceae; D_5__Mycoplasma; D_6__uncultured bacterium	0	0	0	0	0	0	0	0	0	0	0	0	0	0	0	0	0	0	0	0	1	0	0	0	0	0	0	0	0	0	0	0	0	0	0	0	0	0	0	7	1	12	0	1	0	0	3	3
denovo193	D_0__Bacteria; D_1__Tenericutes; D_2__Mollicutes; D_3__Mycoplasmatales; D_4__Mycoplasmataceae; D_5__Mycoplasma; D_6__uncultured bacterium	0	0	0	0	0	0	0	0	0	0	0	0	0	0	0	0	0	0	0	0	0	0	0	1	0	0	0	0	0	0	0	0	0	0	4	0	1	2	0	0	0	2	0	0	0	0	0	3
denovo2862	D_0__Bacteria; D_1__Tenericutes; D_2__Mollicutes; D_3__Mycoplasmatales; D_4__Mycoplasmataceae; D_5__Mycoplasma; D_6__uncultured bacterium	0	0	1	0	0	0	0	0	0	1	0	0	0	0	5	1	0	4	18	0	0	0	6	0	1	0	0	0	0	0	0	0	1	0	0	1	0	0	0	0	0	0	0	0	0	0	0	0
denovo3716	D_0__Bacteria; D_1__Tenericutes; D_2__Mollicutes; D_3__Mycoplasmatales; D_4__Mycoplasmataceae; D_5__Mycoplasma; D_6__uncultured bacterium	0	0	1	11	0	0	0	0	0	5	0	0	0	4	0	0	1	2	0	0	0	0	9	0	0	3	0	0	1	0	1	0	0	0	0	0	0	0	0	0	0	0	0	0	0	0	0	0
denovo7434	D_0__Bacteria; D_1__Tenericutes; D_2__Mollicutes; D_3__Mycoplasmatales; D_4__Mycoplasmataceae; D_5__Mycoplasma; D_6__uncultured bacterium	0	2	0	0	0	0	0	0	0	0	1	0	0	0	0	0	0	0	0	0	0	0	0	0	0	0	0	0	0	0	0	0	0	2	0	0	0	0	0	0	0	0	0	0	0	3	3	0
denovo156	D_0__Bacteria; D_1__Tenericutes; D_2__Mollicutes; D_3__Mycoplasmatales; D_4__Mycoplasmataceae; D_5__Mycoplasma; D_6__uncultured bacterium	0	0	1	0	0	0	0	0	4	0	2	1	6	1	4	0	2	0	0	11	0	0	0	0	1	0	0	0	0	4	0	0	0	0	0	0	0	0	0	0	0	0	0	0	0	0	0	0
denovo169	D_0__Bacteria; D_1__Tenericutes; D_2__Mollicutes; D_3__Mycoplasmatales; D_4__Mycoplasmataceae; D_5__Mycoplasma; D_6__uncultured bacterium	0	0	0	0	0	0	0	0	0	0	0	0	0	0	0	1	0	0	0	0	0	0	0	0	0	0	0	0	0	0	0	0	0	0	8	0	0	1	0	0	3	3	1	0	0	1	0	0
denovo6098	D_0__Bacteria; D_1__Tenericutes; D_2__Mollicutes; D_3__Mycoplasmatales; D_4__Mycoplasmataceae; D_5__Mycoplasma; D_6__uncultured bacterium	0	1	1	0	0	0	0	0	0	0	0	0	0	0	0	0	0	0	0	0	0	0	0	0	0	0	0	0	0	0	0	0	0	1	0	0	2	8	3	0	5	2	0	0	0	0	0	0
denovo1729	D_0__Bacteria; D_1__Tenericutes; D_2__Mollicutes; D_3__Mycoplasmatales; D_4__Mycoplasmataceae; D_5__Mycoplasma; D_6__uncultured bacterium	0	0	0	0	0	1	1	0	0	3	1	1	2	0	0	0	1	0	0	0	0	0	0	0	0	0	0	0	0	0	0	0	0	0	13	0	0	0	0	0	0	0	0	2	0	0	0	0
denovo2603	D_0__Bacteria; D_1__Tenericutes; D_2__Mollicutes; D_3__Mycoplasmatales; D_4__Mycoplasmataceae; D_5__Mycoplasma; D_6__uncultured bacterium	0	0	0	1	1	0	0	0	0	0	1	0	0	2	12	0	0	0	8	2	0	0	4	0	0	0	0	0	0	0	0	0	5	0	0	0	0	0	0	0	0	0	0	0	0	0	0	0
denovo6595	D_0__Bacteria; D_1__Tenericutes; D_2__Mollicutes; D_3__Mycoplasmatales; D_4__Mycoplasmataceae; D_5__Mycoplasma; D_6__uncultured bacterium	0	0	0	0	0	0	0	0	0	0	0	0	0	0	0	0	0	0	0	0	0	0	0	0	0	0	0	0	0	0	0	0	0	1	0	0	10	15	1	0	2	0	0	0	0	0	1	0
denovo1711	D_0__Bacteria; D_1__Tenericutes; D_2__Mollicutes; D_3__Mycoplasmatales; D_4__Mycoplasmataceae; D_5__Mycoplasma; D_6__uncultured bacterium	0	0	0	0	0	0	0	0	0	0	0	0	0	0	1	0	0	0	5	0	0	0	0	0	2	0	0	0	0	0	0	0	0	0	7	0	1	1	0	0	0	1	0	0	0	0	0	0
denovo4244	D_0__Bacteria; D_1__Tenericutes; D_2__Mollicutes; D_3__Mycoplasmatales; D_4__Mycoplasmataceae; D_5__Mycoplasma; D_6__uncultured bacterium	0	0	0	0	0	0	0	0	0	0	0	0	0	0	0	0	0	0	0	0	0	0	0	0	0	0	0	0	0	0	0	0	0	0	0	0	4	1	3	1	1	1	0	1	11	0	3	0
denovo4397	D_0__Bacteria; D_1__Tenericutes; D_2__Mollicutes; D_3__Mycoplasmatales; D_4__Mycoplasmataceae; D_5__Mycoplasma; D_6__uncultured bacterium	0	3	1	1	0	0	0	2	0	0	1	4	0	8	0	10	0	0	0	0	0	0	0	0	0	2	0	0	3	0	0	0	0	0	0	0	0	0	0	0	0	0	0	0	0	0	0	0
denovo2602	D_0__Bacteria; D_1__Tenericutes; D_2__Mollicutes; D_3__Mycoplasmatales; D_4__Mycoplasmataceae; D_5__Mycoplasma; D_6__uncultured bacterium	0	0	0	0	1	0	0	3	0	0	0	1	1	3	1	5	0	2	16	0	0	0	0	0	0	0	0	0	0	0	0	0	2	0	0	0	0	0	0	0	0	0	0	0	0	0	0	0
denovo3849	D_0__Bacteria; D_1__Tenericutes; D_2__Mollicutes; D_3__Mycoplasmatales; D_4__Mycoplasmataceae; D_5__Mycoplasma; D_6__uncultured bacterium	0	0	1	4	0	0	0	0	0	3	0	0	0	2	0	2	0	2	0	1	0	0	0	0	16	3	0	0	1	0	0	0	0	0	0	0	0	0	0	0	0	0	0	0	0	0	0	0
denovo1640	D_0__Bacteria; D_1__Tenericutes; D_2__Mollicutes; D_3__Mycoplasmatales; D_4__Mycoplasmataceae; D_5__Mycoplasma; D_6__uncultured bacterium	0	0	0	0	0	0	0	0	0	0	0	0	0	0	0	0	0	0	0	0	0	0	0	0	0	0	0	0	0	0	0	0	0	0	15	0	0	1	0	0	2	1	4	0	1	0	0	1
denovo1825	D_0__Bacteria; D_1__Tenericutes; D_2__Mollicutes; D_3__Mycoplasmatales; D_4__Mycoplasmataceae; D_5__Mycoplasma; D_6__uncultured bacterium	0	0	0	0	0	0	0	0	0	0	0	0	0	0	0	0	0	0	0	0	0	0	0	0	0	0	0	0	0	0	0	0	0	0	0	1	0	0	0	0	0	2	1	0	0	0	0	1
denovo3555	D_0__Bacteria; D_1__Tenericutes; D_2__Mollicutes; D_3__Mycoplasmatales; D_4__Mycoplasmataceae; D_5__Mycoplasma; D_6__uncultured bacterium	0	0	1	1	0	0	1	0	0	6	1	0	0	0	0	0	0	3	0	3	0	0	1	0	15	0	0	0	1	0	0	0	1	0	0	0	0	0	0	0	0	0	0	0	0	0	0	0
denovo4119	D_0__Bacteria; D_1__Tenericutes; D_2__Mollicutes; D_3__Mycoplasmatales; D_4__Mycoplasmataceae; D_5__Mycoplasma; D_6__uncultured bacterium	0	0	0	2	0	0	0	0	0	2	0	0	0	1	0	4	1	5	0	0	0	0	0	0	0	9	0	0	0	0	0	0	0	0	0	0	0	0	0	0	0	0	0	1	4	0	0	0
denovo841	D_0__Bacteria; D_1__Tenericutes; D_2__Mollicutes; D_3__Mycoplasmatales; D_4__Mycoplasmataceae; D_5__Mycoplasma; D_6__uncultured bacterium	0	0	0	0	0	0	0	0	0	1	0	0	1	0	0	0	0	0	5	1	0	0	0	1	3	0	0	0	0	1	0	0	2	0	4	2	0	0	0	0	0	3	2	0	0	0	0	0
denovo2405	D_0__Bacteria; D_1__Tenericutes; D_2__Mollicutes; D_3__Mycoplasmatales; D_4__Mycoplasmataceae; D_5__Mycoplasma; D_6__uncultured bacterium	0	0	0	3	0	0	0	0	0	2	0	0	0	1	0	0	0	7	1	0	0	0	0	0	0	1	1	0	0	0	0	0	0	0	0	14	1	0	0	0	0	0	0	0	2	0	0	0
denovo4619	D_0__Bacteria; D_1__Tenericutes; D_2__Mollicutes; D_3__Mycoplasmatales; D_4__Mycoplasmataceae; D_5__Mycoplasma; D_6__uncultured bacterium	0	0	0	0	0	0	0	0	0	0	0	0	0	0	0	0	0	0	0	0	0	0	0	0	0	0	0	0	0	0	0	0	0	0	0	0	2	1	0	1	7	2	0	0	0	0	1	0
denovo6437	D_0__Bacteria; D_1__Tenericutes; D_2__Mollicutes; D_3__Mycoplasmatales; D_4__Mycoplasmataceae; D_5__Mycoplasma; D_6__uncultured bacterium	0	0	0	0	0	0	0	0	0	0	0	0	0	0	0	0	0	0	0	0	0	0	0	0	0	0	0	0	0	0	0	0	0	0	0	0	10	1	11	1	1	2	0	1	0	0	0	1
denovo6583	D_0__Bacteria; D_1__Tenericutes; D_2__Mollicutes; D_3__Mycoplasmatales; D_4__Mycoplasmataceae; D_5__Mycoplasma; D_6__uncultured bacterium	0	0	0	0	0	0	0	0	0	0	0	0	0	0	0	0	0	0	0	0	0	0	0	0	0	0	0	0	0	0	0	0	0	0	0	0	4	5	5	6	0	5	0	0	0	0	0	1
denovo2615	D_0__Bacteria; D_1__Tenericutes; D_2__Mollicutes; D_3__Mycoplasmatales; D_4__Mycoplasmataceae; D_5__Mycoplasma; D_6__uncultured bacterium	0	0	0	0	0	0	0	0	0	2	0	0	0	0	1	0	0	0	10	0	0	0	2	0	2	3	0	0	0	0	0	0	0	0	0	1	0	1	0	0	1	0	0	1	1	0	0	0
denovo1638	D_0__Bacteria; D_1__Tenericutes; D_2__Mollicutes; D_3__Mycoplasmatales; D_4__Mycoplasmataceae; D_5__Mycoplasma; D_6__uncultured bacterium	0	0	0	0	0	0	0	0	0	0	0	0	0	0	0	0	0	0	0	0	0	0	0	0	0	0	0	0	0	0	0	0	0	0	1	1	0	0	0	0	0	0	16	2	2	0	0	0
denovo258	D_0__Bacteria; D_1__Tenericutes; D_2__Mollicutes; D_3__Mycoplasmatales; D_4__Mycoplasmataceae; D_5__Mycoplasma; D_6__uncultured bacterium	0	0	0	1	0	0	0	0	0	0	1	0	1	0	3	0	0	0	8	0	0	0	0	0	2	1	0	3	2	0	0	0	8	0	0	0	0	0	0	0	0	0	0	0	0	0	0	0
denovo283	D_0__Bacteria; D_1__Tenericutes; D_2__Mollicutes; D_3__Mycoplasmatales; D_4__Mycoplasmataceae; D_5__Mycoplasma; D_6__uncultured bacterium	0	0	0	0	0	0	0	0	0	0	0	0	0	0	0	0	0	0	0	0	0	0	0	0	0	0	0	0	0	0	0	0	0	0	2	0	2	0	3	3	1	0	1	4	0	0	1	2
denovo4450	D_0__Bacteria; D_1__Tenericutes; D_2__Mollicutes; D_3__Mycoplasmatales; D_4__Mycoplasmataceae; D_5__Mycoplasma; D_6__uncultured bacterium	0	0	0	0	0	0	0	0	0	0	0	0	0	0	0	0	0	0	0	0	0	0	0	0	0	0	0	0	0	0	0	0	0	0	0	0	1	4	0	0	2	0	0	0	7	0	0	1
denovo4609	D_0__Bacteria; D_1__Tenericutes; D_2__Mollicutes; D_3__Mycoplasmatales; D_4__Mycoplasmataceae; D_5__Mycoplasma; D_6__uncultured bacterium	0	0	0	0	0	0	0	0	0	0	0	0	0	0	0	0	0	0	0	0	1	0	0	0	0	0	0	0	0	0	0	0	0	0	0	0	0	1	1	0	0	0	0	2	0	0	0	0
denovo5301	D_0__Bacteria; D_1__Tenericutes; D_2__Mollicutes; D_3__Mycoplasmatales; D_4__Mycoplasmataceae; D_5__Mycoplasma; D_6__uncultured bacterium	0	0	0	0	0	0	0	2	0	0	0	0	0	0	0	2	0	0	0	0	3	0	0	0	0	5	0	0	0	0	0	0	0	1	0	0	1	4	7	1	0	1	0	1	0	0	0	0
denovo5332	D_0__Bacteria; D_1__Tenericutes; D_2__Mollicutes; D_3__Mycoplasmatales; D_4__Mycoplasmataceae; D_5__Mycoplasma; D_6__uncultured bacterium	0	0	0	0	0	0	0	0	0	0	0	0	0	0	0	0	0	0	0	0	0	0	0	0	0	0	0	0	0	0	0	0	0	1	0	0	1	3	4	4	3	1	0	3	0	1	1	2
denovo2937	D_0__Bacteria; D_1__Tenericutes; D_2__Mollicutes; D_3__Mycoplasmatales; D_4__Mycoplasmataceae; D_5__Mycoplasma; D_6__uncultured bacterium	0	1	0	0	0	0	0	1	0	0	1	1	0	5	4	3	0	5	5	1	0	0	1	0	0	0	0	0	0	0	0	0	1	0	0	0	0	0	0	0	0	0	0	0	0	0	0	0
denovo2964	D_0__Bacteria; D_1__Tenericutes; D_2__Mollicutes; D_3__Mycoplasmatales; D_4__Mycoplasmataceae; D_5__Mycoplasma; D_6__uncultured bacterium	0	0	0	1	0	0	0	0	0	2	1	0	0	6	4	1	0	2	0	9	0	0	0	0	2	0	0	0	1	0	0	0	0	0	0	0	0	0	0	0	0	0	0	0	0	0	0	0
denovo710	D_0__Bacteria; D_1__Tenericutes; D_2__Mollicutes; D_3__Mycoplasmatales; D_4__Mycoplasmataceae; D_5__Mycoplasma; D_6__uncultured bacterium	0	0	0	0	0	0	0	0	0	0	0	0	0	0	0	0	0	0	0	0	0	0	0	0	0	0	0	0	0	0	0	0	0	0	0	0	0	0	0	1	0	1	4	4	0	0	4	0
denovo4891	D_0__Bacteria; D_1__Tenericutes; D_2__Mollicutes; D_3__Mycoplasmatales; D_4__Mycoplasmataceae; D_5__Mycoplasma; D_6__uncultured bacterium	0	0	1	8	0	0	0	4	0	0	0	0	0	4	0	3	0	0	0	0	0	0	0	0	0	2	0	0	0	0	0	0	0	0	0	0	1	0	0	0	1	1	0	0	0	0	0	0
denovo6790	D_0__Bacteria; D_1__Tenericutes; D_2__Mollicutes; D_3__Mycoplasmatales; D_4__Mycoplasmataceae; D_5__Mycoplasma; D_6__uncultured bacterium	0	0	0	0	0	0	0	0	0	0	0	0	0	0	0	0	0	0	0	0	0	0	0	0	0	0	0	0	0	0	0	0	0	4	0	0	0	4	1	3	3	5	0	0	0	0	0	3
denovo1757	D_0__Bacteria; D_1__Tenericutes; D_2__Mollicutes; D_3__Mycoplasmatales; D_4__Mycoplasmataceae; D_5__Mycoplasma; D_6__uncultured bacterium	0	0	0	1	0	0	0	0	0	0	0	0	0	0	2	0	1	0	6	0	0	0	5	0	0	0	0	0	0	0	0	0	0	0	1	1	0	0	0	0	0	0	0	0	0	0	0	0
denovo2634	D_0__Bacteria; D_1__Tenericutes; D_2__Mollicutes; D_3__Mycoplasmatales; D_4__Mycoplasmataceae; D_5__Mycoplasma; D_6__uncultured bacterium	0	0	0	0	0	0	0	1	0	0	0	0	1	0	0	1	0	1	5	0	0	0	4	1	0	1	0	0	0	0	0	0	1	0	0	2	1	0	0	0	0	0	0	0	0	0	0	0
denovo6764	D_0__Bacteria; D_1__Tenericutes; D_2__Mollicutes; D_3__Mycoplasmatales; D_4__Mycoplasmataceae; D_5__Mycoplasma; D_6__uncultured bacterium	0	0	0	0	0	0	0	0	0	0	0	0	0	0	0	0	0	0	0	0	0	0	0	0	0	0	0	0	0	0	0	0	0	0	0	0	0	4	1	0	1	4	0	6	0	0	3	0
denovo745	D_0__Bacteria; D_1__Tenericutes; D_2__Mollicutes; D_3__Mycoplasmatales; D_4__Mycoplasmataceae; D_5__Mycoplasma; D_6__uncultured bacterium	0	0	1	0	0	0	0	0	0	1	0	0	0	0	0	0	0	2	3	0	0	0	1	0	2	1	0	0	0	1	0	0	0	0	2	0	0	0	0	0	1	0	3	0	0	0	0	0
denovo1843	D_0__Bacteria; D_1__Tenericutes; D_2__Mollicutes; D_3__Mycoplasmatales; D_4__Mycoplasmataceae; D_5__Mycoplasma; D_6__uncultured bacterium	0	0	0	0	0	0	0	0	0	0	0	0	0	0	0	0	0	0	0	0	0	0	0	0	0	0	0	0	0	0	0	0	0	0	0	3	0	2	1	1	0	2	2	2	2	0	0	0
denovo3628	D_0__Bacteria; D_1__Tenericutes; D_2__Mollicutes; D_3__Mycoplasmatales; D_4__Mycoplasmataceae; D_5__Mycoplasma; D_6__uncultured bacterium	0	0	0	1	0	0	0	0	1	2	1	0	0	2	0	0	0	8	0	5	0	0	0	0	2	0	0	0	1	0	0	0	1	0	0	0	0	0	0	0	0	0	0	0	0	0	0	0
denovo5223	D_0__Bacteria; D_1__Tenericutes; D_2__Mollicutes; D_3__Mycoplasmatales; D_4__Mycoplasmataceae; D_5__Mycoplasma; D_6__uncultured bacterium	0	0	0	0	0	0	0	0	1	0	0	0	0	0	0	1	0	0	0	0	0	0	0	0	0	0	0	0	0	0	0	0	0	0	0	0	4	0	3	1	1	1	0	0	0	0	0	0
denovo1659	D_0__Bacteria; D_1__Tenericutes; D_2__Mollicutes; D_3__Mycoplasmatales; D_4__Mycoplasmataceae; D_5__Mycoplasma; D_6__uncultured bacterium	0	0	0	0	0	0	0	0	0	0	0	0	0	0	0	0	0	0	4	0	0	0	0	0	0	0	0	0	0	0	0	0	1	0	2	0	1	0	0	0	0	0	5	0	0	1	0	1
denovo4882	D_0__Bacteria; D_1__Tenericutes; D_2__Mollicutes; D_3__Mycoplasmatales; D_4__Mycoplasmataceae; D_5__Mycoplasma; D_6__uncultured bacterium	0	0	0	0	0	0	0	0	0	0	0	0	0	0	0	0	2	0	0	0	0	0	0	0	0	0	2	0	0	0	0	0	0	0	0	0	0	2	3	1	0	0	0	1	0	0	0	0
denovo84	D_0__Bacteria; D_1__Tenericutes; D_2__Mollicutes; D_3__Mycoplasmatales; D_4__Mycoplasmataceae; D_5__Mycoplasma; D_6__uncultured bacterium	0	0	0	0	0	0	0	0	0	0	0	0	0	0	2	0	0	2	2	0	0	0	0	0	0	0	0	0	0	0	0	0	0	1	1	0	3	0	0	0	0	1	0	3	0	0	0	0
denovo5319	D_0__Bacteria; D_1__Tenericutes; D_2__Mollicutes; D_3__Mycoplasmatales; D_4__Mycoplasmataceae; D_5__Mycoplasma; D_6__uncultured bacterium	0	1	0	0	1	0	0	5	2	0	0	1	0	0	0	1	0	0	0	0	0	0	0	0	0	5	0	0	0	0	0	0	0	1	0	0	0	4	0	0	0	1	0	0	0	0	0	0
denovo681	D_0__Bacteria; D_1__Tenericutes; D_2__Mollicutes; D_3__Mycoplasmatales; D_4__Mycoplasmataceae; D_5__Mycoplasma; D_6__uncultured bacterium	0	0	0	0	0	0	0	0	0	0	0	0	0	0	0	0	0	0	1	0	0	0	0	0	0	0	0	0	0	0	0	0	0	0	3	0	2	1	0	0	0	0	0	0	0	0	0	0
denovo1160	D_0__Bacteria; D_1__Tenericutes; D_2__Mollicutes; D_3__Mycoplasmatales; D_4__Mycoplasmataceae; D_5__Mycoplasma; D_6__uncultured bacterium	0	0	0	0	0	0	0	0	0	0	0	0	0	0	0	0	0	0	0	0	0	0	0	0	0	0	0	0	0	0	0	0	0	0	3	0	1	1	0	1	2	0	2	3	0	0	0	0
denovo79	D_0__Bacteria; D_1__Tenericutes; D_2__Mollicutes; D_3__Mycoplasmatales; D_4__Mycoplasmataceae; D_5__Mycoplasma; D_6__uncultured bacterium	0	0	0	0	0	0	0	0	0	0	0	0	0	0	0	0	0	0	0	0	0	0	0	0	0	0	0	0	0	0	0	0	0	0	3	0	0	0	0	0	1	0	1	1	0	0	1	0
denovo4616	D_0__Bacteria; D_1__Tenericutes; D_2__Mollicutes; D_3__Mycoplasmatales; D_4__Mycoplasmataceae; D_5__Mycoplasma; D_6__uncultured bacterium	0	0	0	0	0	0	0	0	0	0	0	0	0	0	0	0	0	0	0	0	0	0	0	0	0	0	0	0	0	0	0	0	0	1	0	0	0	5	0	1	0	1	0	1	0	0	0	0
denovo5871	D_0__Bacteria; D_1__Tenericutes; D_2__Mollicutes; D_3__Mycoplasmatales; D_4__Mycoplasmataceae; D_5__Mycoplasma; D_6__uncultured bacterium	0	0	0	0	0	0	0	0	0	0	0	0	0	0	0	0	0	0	0	0	0	0	0	0	0	0	0	0	0	0	0	0	0	1	0	0	2	2	2	0	1	2	0	1	0	0	0	0
denovo6	Unassigned	1	21	14	7	0	0	30	27	653	703	149	373	1793	245	1985	73	1	257	1273	4142	0	20	51	9	313	2	0	0	200	1015	0	0	149	0	10	0	7	0	0	1	35	29	0	0	0	4	0	0
denovo1	Unassigned	19	0	136	23	0	4	117	134	11	3	0	10	23	35	19	40	23	10	437	0	241	325	698	48	345	0	0	0	0	0	0	1	126	165	735	19	30	1807	1	0	1173	268	782	0	1	1	15	13
denovo7	Unassigned	29	0	0	0	0	536	730	0	0	0	0	0	0	1	3	0	40	0	0	0	0	5	3	634	2088	0	61	741	0	0	0	120	9	0	78	0	0	0	0	0	0	0	2	0	267	1659	0	0
denovo8	Unassigned	396	0	0	0	0	0	0	0	0	0	0	0	0	0	2	13	0	0	0	0	0	3	0	0	0	0	0	0	0	0	0	0	26	0	727	0	2	0	1	1	19	1	131	15	800	936	835	9
denovo16	Unassigned	91	3	0	0	190	4	22	2	0	0	150	0	0	1	0	0	80	1	1	0	0	32	0	60	14	0	33	344	0	0	0	0	2	0	2	0	6	3	0	0	0	4	0	0	5	37	0	1
denovo29	Unassigned	4	0	21	26	5	4	18	200	26	2	0	8	0	263	14	46	4	18	110	20	0	0	10	16	31	0	0	0	0	0	0	0	8	0	2	0	0	0	0	0	0	2	0	0	0	0	0	0
denovo37	Unassigned	0	0	0	0	0	0	0	0	0	0	0	0	0	0	0	0	0	0	0	0	33	0	0	0	0	0	0	0	0	0	0	0	0	15	35	6	12	1	8	55	8	35	15	93	7	16	3	45
denovo28	Unassigned	0	0	0	0	0	5	1	12	0	0	0	0	0	3	1	0	0	0	1	0	0	0	0	0	0	0	0	0	0	0	0	0	0	0	0	8	4	0	0	0	0	491	1	0	0	0	1	0
denovo1749	Unassigned	70	0	0	0	0	0	0	0	0	0	0	0	0	0	0	3	0	0	0	0	0	0	0	0	0	0	0	0	0	0	0	0	10	0	46	0	0	1	0	0	0	0	9	1	133	89	128	2
denovo7355	Unassigned	0	0	47	0	0	0	0	0	0	0	1	0	0	0	0	0	0	0	0	0	82	0	0	0	0	0	0	0	0	0	0	0	0	39	0	0	0	0	0	0	135	5	0	0	0	0	2	0
denovo39	Unassigned	0	0	0	0	0	0	115	0	0	5	4	0	1	31	14	0	0	20	23	2	0	0	0	0	0	0	0	0	0	0	0	0	0	5	1	0	0	12	0	1	0	194	0	0	0	3	0	2
denovo3885	Unassigned	2	0	0	0	0	19	37	0	0	0	0	0	0	0	0	0	14	0	0	0	0	0	0	78	266	0	17	0	0	0	0	19	0	0	0	0	0	0	0	0	0	0	0	0	9	5	0	0
denovo6533	Unassigned	0	0	13	0	0	0	0	0	0	0	0	0	0	0	0	0	0	0	0	0	6	0	0	0	0	0	0	0	0	0	0	0	0	16	0	0	1	106	0	0	73	21	0	0	0	0	4	2
denovo99	Unassigned	0	0	0	0	0	11	15	31	0	1	0	0	1	9	6	1	0	0	1	0	0	0	0	0	0	0	0	0	0	0	0	0	0	0	2	2	5	0	0	0	0	155	2	0	0	0	2	0
denovo1680	Unassigned	0	0	1	0	0	0	0	0	0	0	0	0	1	1	0	3	0	0	2	0	0	1	12	0	1	0	0	0	0	0	0	0	1	1	38	2	0	4	0	0	0	0	24	0	0	0	0	0
denovo1217	Unassigned	2	0	0	0	0	2	13	0	0	0	0	0	0	0	0	0	1	0	0	0	0	0	0	34	8	0	2	113	0	0	0	1	0	0	1	0	0	0	0	0	0	0	0	0	0	0	0	0
denovo3309	Unassigned	2	0	3	0	0	0	3	7	1	0	0	0	0	1	0	1	1	0	0	0	3	11	26	3	8	0	0	0	0	0	0	0	2	10	0	0	0	29	0	0	21	5	0	0	0	0	1	0
denovo211	Unassigned	0	0	0	1	0	0	18	0	0	0	0	1	0	1	1	7	0	0	7	0	4	3	8	0	2	0	0	0	0	0	0	0	3	0	3	0	1	27	0	0	4	3	25	0	0	0	0	0
denovo5118	Unassigned	28	1	0	0	32	0	0	0	0	0	28	0	0	0	0	0	20	0	0	0	0	0	0	0	0	0	0	0	0	0	0	0	0	0	0	0	0	0	0	0	0	0	0	0	0	1	0	0
denovo6048	Unassigned	0	0	3	0	0	0	0	0	0	0	0	2	0	0	0	0	0	0	0	0	0	0	0	0	0	0	0	0	0	0	0	0	0	4	0	0	1	70	0	0	11	4	0	0	0	0	0	1
denovo3485	Unassigned	0	0	0	0	0	1	4	0	0	1	0	0	0	2	0	0	1	2	0	0	0	1	21	0	12	0	0	0	0	0	0	0	57	1	0	0	0	1	0	0	0	1	0	0	0	0	0	0
denovo4473	Unassigned	0	0	0	0	0	0	0	0	0	0	0	0	0	0	0	0	0	0	0	0	7	0	0	0	0	0	0	0	0	0	0	0	0	5	0	0	7	4	6	6	2	7	0	13	0	3	2	12
denovo1228	Unassigned	0	0	0	0	0	0	1	0	0	0	0	0	0	0	0	0	14	0	0	0	0	0	0	13	13	0	1	36	0	0	0	0	0	0	0	0	0	0	0	0	0	0	0	0	2	0	0	0
denovo1147	Unassigned	0	0	0	0	0	0	0	0	0	0	0	0	0	0	0	0	0	0	0	0	0	0	0	0	0	0	0	0	0	0	0	0	0	2	7	1	3	0	0	11	0	5	0	25	0	3	0	11
denovo5111	Unassigned	4	1	1	6	0	0	0	20	4	0	0	2	0	0	0	3	20	0	0	0	0	0	0	0	0	0	0	0	0	0	0	0	0	0	0	0	0	17	0	0	1	0	0	0	0	0	0	0
denovo1112	Unassigned	0	0	0	0	0	0	0	0	0	0	0	0	0	0	0	0	0	0	0	0	1	0	0	0	0	0	0	0	0	0	0	0	0	0	1	5	3	0	1	10	1	1	10	24	1	1	1	3
denovo294	Unassigned	0	0	2	0	0	0	1	1	0	0	0	1	0	0	0	0	1	0	8	0	5	0	2	0	2	0	0	0	0	0	0	0	2	5	2	0	0	7	0	0	5	1	18	0	0	0	0	0
denovo49	Unassigned	0	0	0	0	0	0	4	0	7	0	0	0	1	0	0	0	0	0	0	0	1	0	20	0	0	0	0	0	0	0	0	0	0	0	12	2	0	0	0	0	0	3	0	0	0	0	0	0
denovo1953	Unassigned	0	0	0	0	0	0	0	1	0	0	0	0	0	0	0	0	0	0	3	0	0	1	3	1	1	0	0	0	0	0	0	0	1	3	0	1	0	9	0	0	0	0	12	0	0	0	0	0
denovo5793	Unassigned	0	0	6	0	0	0	0	0	0	0	0	1	0	0	0	0	0	0	0	0	11	0	0	0	0	0	0	0	0	0	0	0	0	8	0	0	1	11	0	0	6	0	0	0	0	0	2	0
denovo3838	Unassigned	1	0	0	0	0	0	2	6	0	0	0	0	0	1	0	0	0	0	0	0	0	2	0	0	13	0	0	0	0	0	0	0	0	6	0	0	0	26	0	0	1	3	0	0	0	0	0	0
denovo4052	Unassigned	1	0	0	1	0	1	41	7	0	0	0	0	0	3	0	1	3	0	0	0	0	0	0	0	0	0	0	0	0	0	0	0	0	0	0	0	0	1	0	0	0	0	0	0	0	0	0	0
denovo5011	Unassigned	0	0	0	15	0	0	0	3	0	0	2	0	0	0	0	1	1	0	0	0	4	0	0	0	0	0	0	0	0	0	0	0	0	0	0	0	1	2	0	0	0	1	0	7	0	0	6	0
denovo1246	Unassigned	3	0	0	0	0	2	4	0	0	0	0	0	0	0	0	0	1	0	0	0	0	0	0	17	1	0	1	21	0	0	0	0	0	0	8	0	0	0	0	0	0	0	0	0	0	0	0	0
denovo1460	Unassigned	0	0	0	0	0	0	0	0	0	0	0	0	1	0	0	0	0	0	3	0	1	1	1	0	1	0	0	0	0	0	0	0	0	0	4	0	0	1	0	0	1	2	13	0	0	0	0	0
denovo333	Unassigned	0	0	0	0	0	1	3	0	0	0	0	0	0	0	0	0	1	0	0	0	0	0	0	4	4	0	0	33	0	0	0	0	0	0	4	0	0	0	0	0	0	0	0	0	2	2	0	0
denovo6616	Unassigned	0	0	1	0	0	0	0	0	0	0	0	0	0	0	0	0	0	0	0	0	0	0	0	0	0	0	0	0	0	0	0	0	0	0	0	0	1	33	0	0	6	2	0	0	0	0	0	0
denovo2929	Unassigned	0	0	0	0	0	0	0	0	1	1	0	0	0	0	3	0	1	1	28	0	0	0	4	0	4	0	0	0	0	0	0	0	11	0	0	0	0	0	0	0	0	1	0	0	0	0	0	0
denovo629	Unassigned	0	1	1	17	0	0	0	4	0	0	2	0	0	3	0	0	3	0	1	0	1	0	0	0	2	0	0	0	0	2	0	1	4	0	0	0	0	0	0	0	0	1	6	3	0	0	1	0
denovo46	Unassigned	0	2	2	6	0	0	0	2	0	0	0	0	0	2	0	0	2	0	0	0	0	0	0	0	0	1	0	0	0	0	0	0	0	0	0	1	0	0	0	0	0	0	6	15	0	0	6	0
denovo3470	Unassigned	0	0	0	1	0	0	11	10	0	0	0	1	0	1	0	8	4	0	0	0	0	0	2	0	0	0	0	0	0	0	0	0	7	1	0	0	0	3	0	0	0	0	0	0	0	0	0	0
denovo6540	Unassigned	0	0	1	0	0	0	0	0	0	0	0	0	0	0	0	0	0	0	0	0	1	0	0	0	0	0	0	0	0	0	0	0	0	1	0	0	2	37	0	0	4	0	0	0	0	0	0	1
denovo7386	Unassigned	0	0	20	0	0	0	0	0	0	0	1	0	0	0	0	0	0	0	0	0	3	0	0	0	0	0	0	0	0	0	0	0	0	3	0	0	0	0	0	0	0	1	0	0	0	0	0	0
denovo2503	Unassigned	0	0	0	0	0	0	22	1	0	0	0	0	0	1	2	0	0	0	9	0	0	0	2	1	1	0	0	0	0	0	0	0	7	0	0	0	0	2	0	0	0	0	2	0	0	0	0	0
denovo3876	Unassigned	4	0	0	0	5	1	3	0	0	0	0	0	0	0	0	0	7	0	0	0	0	0	0	7	6	0	6	0	0	0	0	0	0	0	0	0	0	0	0	0	0	0	0	0	0	0	0	0
denovo1038	Unassigned	0	0	0	2	0	0	0	0	0	0	0	0	0	0	0	0	0	0	0	0	0	0	0	0	1	0	0	0	0	1	0	0	0	1	0	1	1	0	0	0	0	0	4	1	0	0	15	0
denovo2675	Unassigned	0	0	0	0	0	0	0	0	0	0	0	0	0	0	0	0	0	0	0	0	1	0	0	0	0	0	0	0	0	0	0	0	0	2	0	6	3	0	2	5	1	3	0	2	0	2	0	3
denovo3453	Unassigned	0	0	0	0	0	0	1	0	0	0	0	0	0	0	0	0	0	0	0	0	0	4	7	0	4	0	0	0	0	0	0	0	4	2	0	0	0	5	0	0	4	2	0	0	0	0	1	0
denovo2627	Unassigned	0	0	0	1	0	0	0	3	0	2	0	0	1	1	5	2	0	4	12	0	0	0	0	0	2	1	0	0	0	0	0	0	1	0	0	0	0	0	0	0	0	0	0	0	1	0	0	0
denovo2717	Unassigned	0	0	0	0	0	0	0	0	0	0	0	0	0	0	0	0	0	0	1	0	1	3	4	0	0	0	0	0	0	0	0	0	0	4	0	0	0	7	0	0	7	1	0	0	0	0	0	0
denovo183	Unassigned	0	0	0	0	0	0	0	0	0	0	0	0	0	0	0	0	0	0	0	0	0	0	0	0	0	0	0	0	0	0	0	0	0	0	2	1	0	0	0	0	1	0	7	2	0	0	1	1
denovo6971	Unassigned	0	0	0	0	0	0	0	0	0	0	0	0	0	0	0	0	0	0	0	0	1	0	0	0	0	0	0	0	0	0	0	0	0	0	0	0	0	0	3	4	1	5	0	3	0	5	0	8
denovo1017	Unassigned	0	0	0	0	0	0	0	0	0	0	0	0	0	0	0	0	0	0	0	0	1	0	0	0	0	0	0	0	0	0	0	0	0	1	2	1	1	0	0	2	1	2	8	3	1	1	2	1
denovo1568	Unassigned	0	0	0	0	0	0	0	0	0	0	0	0	0	0	0	0	0	0	0	0	0	0	0	0	0	0	0	0	0	0	0	0	0	0	2	0	0	0	0	0	0	0	4	0	0	0	0	0
denovo38	Unassigned	0	0	0	0	0	0	0	0	0	0	0	0	0	0	0	0	0	0	0	0	7	0	0	0	0	0	0	0	0	0	0	6	0	0	0	0	0	0	0	0	0	0	0	1	0	2	0	3
denovo6734	Unassigned	0	0	3	0	0	0	0	0	0	0	0	0	0	0	0	0	0	0	0	0	0	0	0	0	0	0	0	0	0	0	0	0	0	1	0	0	0	12	0	0	0	3	0	0	0	0	0	0
denovo3308	Unassigned	0	0	0	0	0	0	1	0	0	0	0	0	0	0	0	0	0	0	0	0	0	2	5	1	4	0	0	0	0	0	0	0	2	0	0	0	0	7	0	0	2	1	0	0	0	0	0	0
denovo1026	Unassigned	0	0	0	0	0	0	0	0	0	0	0	0	0	0	0	0	0	0	0	0	0	0	0	0	0	0	0	0	0	0	0	0	0	1	0	0	3	0	0	0	0	1	8	0	1	1	0	0
[truncated: 16 more columns]

## Sheet: HC
OTU ID	Taxonomy	HC.0006	HC.0023	HC.0029	HC.0040	HC.0042	HC.0054	HC.0056	HC.0060	HC.0063	HC.0063.2	HC.0064	HC.0072	HC.0072.2	HC.0074	HC.0074.2	HC.0075	HC.0075.2	HC.0089	HC.0091	HC.0094	HC.0129	HC.0140	HC.0147	HC.0152	HC.0153	HC.0154	HC.0155	HC.0155.2	HC.0156	HC.0156.2	HC.0168	HC.0170	HC.0178	Suma
denovo6	Unassigned	1	21	14	7	0	0	30	27	653	703	149	373	1793	245	1985	73	1	257	1273	4142	0	20	51	9	313	2	0	0	200	1015	0	0	149	13506
denovo23	D_0__Bacteria; D_1__Tenericutes; D_2__Mollicutes; D_3__Mycoplasmatales; D_4__Mycoplasmataceae; D_5__Mycoplasma; D_6__uncultured bacterium	0	40	260	397	95	6	0	142	23	135	6	7	19	82	149	123	8	1843	1611	14	0	0	516	1	96	484	1	36	0	27	41	58	683	6903
denovo7	Unassigned	29	0	0	0	0	536	730	0	0	0	0	0	0	1	3	0	40	0	0	0	0	5	3	634	2088	0	61	741	0	0	0	120	9	5000
denovo2	D_0__Bacteria; D_1__Tenericutes; D_2__Mollicutes; D_3__Mycoplasmatales; D_4__Mycoplasmataceae; D_5__Mycoplasma; D_6__uncultured bacterium	0	0	18	2	0	534	410	0	307	2589	0	110	525	6	11	0	189	0	2	0	0	0	0	4	1	0	0	0	2	33	0	0	0	4743
denovo14	D_0__Bacteria; D_1__Proteobacteria; D_2__Alphaproteobacteria; D_3__Rickettsiales; D_4__Anaplasmataceae; D_5__Candidatus Xenohaliotis; D_6__Candidatus Xenohaliotis californiensis	0	2	0	36	2	0	0	0	0	0	1	0	0	0	1	1	0	0	14	0	0	3	56	12	173	754	137	2171	1	7	8	0	130	3509
denovo1	Unassigned	19	0	136	23	0	4	117	134	11	3	0	10	23	35	19	40	23	10	437	0	241	325	698	48	345	0	0	0	0	0	0	1	126	2828
denovo5	D_0__Bacteria; D_1__Proteobacteria; D_2__Gammaproteobacteria; D_3__Vibrionales; D_4__Vibrionaceae; D_5__Vibrio; Ambiguous_taxa	0	4	1	3	0	0	0	0	0	0	0	1	0	0	36	0	0	0	0	0	0	1	0	597	15	0	7	74	2	54	143	0	1694	2632
denovo11	D_0__Bacteria; D_1__Tenericutes; D_2__Mollicutes; D_3__Mycoplasmatales; D_4__Mycoplasmataceae; D_5__Mycoplasma; D_6__uncultured bacterium	8	3	1	4	0	4	82	32	12	96	2	4	103	28	254	4	2	23	554	179	6	58	294	17	377	35	0	1	0	0	0	0	364	2547
denovo3	D_0__Bacteria; D_1__Tenericutes; D_2__Mollicutes; D_3__Mycoplasmatales; D_4__Mycoplasmataceae; D_5__Mycoplasma; D_6__uncultured bacterium	0	0	43	72	14	0	0	29	2	19	0	6	7	7	27	13	1	445	893	3	0	0	196	0	82	95	0	2	0	1	2	7	548	2514
denovo16	Unassigned	91	3	0	0	190	4	22	2	0	0	150	0	0	1	0	0	80	1	1	0	0	32	0	60	14	0	33	344	0	0	0	0	2	1030
denovo21	D_0__Bacteria; D_1__Fusobacteria; D_2__Fusobacteriia; D_3__Fusobacteriales; D_4__Fusobacteriaceae; D_5__Psychrilyobacter; D_6__uncultured bacterium	1	24	73	225	2	0	14	38	4	0	0	5	0	0	16	12	1	12	0	0	91	0	6	30	1	0	0	0	2	22	45	4	391	1019
denovo2845	D_0__Bacteria; D_1__Tenericutes; D_2__Mollicutes; D_3__Mycoplasmatales; D_4__Mycoplasmataceae; D_5__Mycoplasma; D_6__uncultured bacterium	0	0	0	0	0	0	0	1	3	82	1	6	17	28	446	2	0	42	138	111	0	0	1	0	39	0	0	0	34	0	0	0	6	957
denovo47	D_0__Bacteria; D_1__Tenericutes; D_2__Mollicutes; D_3__Mycoplasmatales; D_4__Mycoplasmataceae; D_5__Mycoplasma; D_6__uncultured bacterium	0	6	2	5	1	0	0	5	38	52	29	40	57	28	99	13	3	77	167	199	0	0	6	2	11	3	0	0	15	43	0	0	1	902
denovo2792	D_0__Bacteria; D_1__Tenericutes; D_2__Mollicutes; D_3__Mycoplasmatales; D_4__Mycoplasmataceae; D_5__Mycoplasma; D_6__uncultured bacterium	0	0	0	0	0	0	0	0	2	8	2	0	262	51	432	0	0	16	40	30	0	0	0	0	19	0	0	0	0	0	0	0	4	866
denovo29	Unassigned	4	0	21	26	5	4	18	200	26	2	0	8	0	263	14	46	4	18	110	20	0	0	10	16	31	0	0	0	0	0	0	0	8	854
denovo3641	D_0__Bacteria; D_1__Tenericutes; D_2__Mollicutes; D_3__Mycoplasmatales; D_4__Mycoplasmataceae; D_5__Mycoplasma; D_6__uncultured bacterium	1	2	0	3	14	0	1	109	15	36	0	0	0	26	0	25	3	343	0	4	0	0	104	1	3	74	1	0	0	0	2	3	38	808
denovo4156	D_0__Bacteria; D_1__Tenericutes; D_2__Mollicutes; D_3__Mycoplasmatales; D_4__Mycoplasmataceae; D_5__Mycoplasma; D_6__uncultured bacterium	0	0	2	4	0	21	0	0	5	595	0	5	0	6	0	0	82	0	0	0	0	0	0	0	0	0	0	0	0	0	0	0	0	720
denovo2573	D_0__Bacteria; D_1__Tenericutes; D_2__Mollicutes; D_3__Mycoplasmatales; D_4__Mycoplasmataceae; D_5__Mycoplasma; D_6__uncultured bacterium	0	0	1	0	0	0	0	7	0	4	0	0	5	1	40	2	0	126	435	0	0	0	9	0	9	9	0	0	0	0	1	7	33	689
denovo3425	D_0__Bacteria; D_1__Tenericutes; D_2__Mollicutes; D_3__Mycoplasmatales; D_4__Mycoplasmataceae; D_5__Mycoplasma; D_6__uncultured bacterium	3	1	0	3	0	1	7	8	11	14	0	1	1	33	0	1	2	1	0	15	0	6	141	7	231	7	0	0	0	0	0	0	135	629
denovo3351	D_0__Bacteria; D_1__Tenericutes; D_2__Mollicutes; D_3__Mycoplasmatales; D_4__Mycoplasmataceae; D_5__Mycoplasma; D_6__uncultured bacterium	0	0	0	0	0	0	0	0	1	204	1	4	20	2	0	0	0	118	0	195	0	0	0	1	54	0	0	0	4	0	0	0	11	615
denovo2788	D_0__Bacteria; D_1__Tenericutes; D_2__Mollicutes; D_3__Mycoplasmatales; D_4__Mycoplasmataceae; D_5__Mycoplasma; D_6__uncultured bacterium	0	0	1	0	0	0	0	1	3	17	2	3	194	4	183	5	0	11	49	32	0	0	5	0	10	0	0	0	1	0	0	0	8	529
denovo24	D_0__Bacteria; D_1__Proteobacteria; D_2__Gammaproteobacteria; D_3__Vibrionales; D_4__Vibrionaceae; D_5__Vibrio	0	0	0	0	0	0	0	0	0	0	0	0	0	0	1	0	0	0	0	0	0	7	2	74	8	0	2	19	0	7	30	0	344	494
denovo3618	D_0__Bacteria; D_1__Tenericutes; D_2__Mollicutes; D_3__Mycoplasmatales; D_4__Mycoplasmataceae; D_5__Mycoplasma; D_6__uncultured bacterium	0	2	3	3	0	0	0	1	44	99	24	32	1	45	0	6	0	44	0	130	0	0	1	0	7	0	0	0	28	0	0	0	4	474
denovo1539	D_0__Bacteria; D_1__Tenericutes; D_2__Mollicutes; D_3__Mycoplasmatales; D_4__Mycoplasmataceae; D_5__Mycoplasma; D_6__uncultured bacterium	0	0	0	0	0	0	0	4	1	3	0	0	3	0	29	0	0	169	238	0	0	0	2	0	7	1	0	0	0	0	0	0	1	458
denovo3885	Unassigned	2	0	0	0	0	19	37	0	0	0	0	0	0	0	0	0	14	0	0	0	0	0	0	78	266	0	17	0	0	0	0	19	0	452
denovo8	Unassigned	396	0	0	0	0	0	0	0	0	0	0	0	0	0	2	13	0	0	0	0	0	3	0	0	0	0	0	0	0	0	0	0	26	440
denovo3691	D_0__Bacteria; D_1__Tenericutes; D_2__Mollicutes; D_3__Mycoplasmatales; D_4__Mycoplasmataceae; D_5__Mycoplasma; D_6__uncultured bacterium	0	1	0	0	0	0	0	0	2	58	2	2	1	25	0	5	0	15	0	268	0	0	3	1	2	0	0	0	22	0	0	0	0	407
denovo3787	D_0__Bacteria; D_1__Tenericutes; D_2__Mollicutes; D_3__Mycoplasmatales; D_4__Mycoplasmataceae; D_5__Mycoplasma; D_6__uncultured bacterium	10	0	0	5	1	8	25	29	8	40	0	1	1	67	0	4	1	0	0	21	0	36	38	30	60	17	0	0	0	0	0	0	0	402
denovo3533	D_0__Bacteria; D_1__Tenericutes; D_2__Mollicutes; D_3__Mycoplasmatales; D_4__Mycoplasmataceae; D_5__Mycoplasma; D_6__uncultured bacterium	1	2	0	0	0	0	15	2	8	16	0	1	0	11	0	6	0	19	0	53	0	2	86	8	115	1	0	0	1	0	0	0	17	364
denovo1507	D_0__Bacteria; D_1__Tenericutes; D_2__Mollicutes; D_3__Mycoplasmatales; D_4__Mycoplasmataceae; D_5__Mycoplasma; D_6__uncultured bacterium	0	0	1	0	0	2	82	0	3	98	0	5	129	4	3	0	11	0	0	0	0	0	0	4	1	0	0	0	1	0	0	0	0	344
denovo57	D_0__Bacteria; D_1__Spirochaetae; D_2__Spirochaetes; D_3__Spirochaetales; D_4__Spirochaetaceae; D_5__uncultured; D_6__uncultured Spirochaetes bacterium	5	0	0	0	0	1	5	0	0	0	0	0	0	0	0	0	0	1	0	0	0	0	0	6	1	0	11	270	0	0	0	1	1	302
denovo3789	D_0__Bacteria; D_1__Tenericutes; D_2__Mollicutes; D_3__Mycoplasmatales; D_4__Mycoplasmataceae; D_5__Mycoplasma; D_6__uncultured bacterium	0	0	4	6	1	0	0	22	0	34	0	0	0	10	0	4	0	172	0	3	0	0	12	0	8	7	2	0	1	0	0	0	0	286
denovo3550	D_0__Bacteria; D_1__Tenericutes; D_2__Mollicutes; D_3__Mycoplasmatales; D_4__Mycoplasmataceae; D_5__Mycoplasma; D_6__uncultured bacterium	0	1	0	0	0	0	4	0	2	85	0	3	5	3	0	1	1	47	0	71	0	0	2	1	42	0	0	0	0	0	0	0	3	271
denovo44	D_0__Bacteria; D_1__Tenericutes; D_2__Mollicutes; D_3__Mycoplasmatales; D_4__Mycoplasmataceae; D_5__Mycoplasma; D_6__uncultured bacterium	0	0	0	0	0	0	0	0	2	11	0	0	3	0	22	0	0	78	123	11	0	0	7	0	4	0	0	0	0	0	0	0	2	263
denovo2338	D_0__Bacteria; D_1__Tenericutes; D_2__Mollicutes; D_3__Mycoplasmatales; D_4__Mycoplasmataceae; D_5__Mycoplasma; D_6__uncultured bacterium	0	1	5	7	2	0	0	5	0	7	0	1	0	3	14	1	0	78	115	0	0	0	3	0	2	9	0	0	0	0	0	0	7	260
denovo0	D_0__Bacteria; D_1__Tenericutes; D_2__Mollicutes; D_3__Mycoplasmatales; D_4__Mycoplasmataceae; D_5__Mycoplasma; D_6__uncultured bacterium	0	0	0	0	0	0	0	1	1	0	0	0	0	0	0	2	0	0	0	0	52	4	0	102	0	0	8	74	1	2	0	0	0	247
denovo41	D_0__Bacteria; D_1__Proteobacteria; D_2__Gammaproteobacteria; D_3__Vibrionales; D_4__Vibrionaceae; D_5__Vibrio; Ambiguous_taxa	0	56	27	4	151	0	2	0	0	1	0	0	0	0	0	0	0	0	0	1	0	0	0	0	0	0	0	0	0	0	0	0	1	243
denovo2946	D_0__Bacteria; D_1__Tenericutes; D_2__Mollicutes; D_3__Mycoplasmatales; D_4__Mycoplasmataceae; D_5__Mycoplasma; D_6__uncultured bacterium	0	0	1	0	0	0	0	1	3	15	0	2	3	5	109	0	0	18	24	24	0	0	0	0	22	0	0	0	7	0	0	0	2	236
denovo5193	D_0__Bacteria; D_1__Tenericutes; D_2__Mollicutes; D_3__Mycoplasmatales; D_4__Mycoplasmataceae; D_5__Mycoplasma; D_6__uncultured bacterium	0	1	19	2	41	2	0	20	4	0	0	0	0	0	0	28	1	0	0	0	0	0	0	0	0	111	0	0	0	0	1	0	0	230
denovo3663	D_0__Bacteria; D_1__Tenericutes; D_2__Mollicutes; D_3__Mycoplasmatales; D_4__Mycoplasmataceae; D_5__Mycoplasma; D_6__uncultured bacterium	0	0	0	20	1	0	0	0	1	12	0	0	0	0	0	0	0	16	0	1	0	0	104	1	27	4	0	0	0	0	0	0	41	228
denovo25	D_0__Bacteria; D_1__Proteobacteria; D_2__Gammaproteobacteria; D_3__Vibrionales; D_4__Vibrionaceae; D_5__Vibrio	1	1	14	17	45	0	0	0	0	0	0	0	7	33	14	0	0	22	4	0	1	4	56	1	1	0	0	0	0	0	0	0	2	223
denovo5159	D_0__Bacteria; D_1__Tenericutes; D_2__Mollicutes; D_3__Mycoplasmatales; D_4__Mycoplasmataceae; D_5__Mycoplasma; D_6__uncultured bacterium	1	2	2	4	2	1	0	20	102	0	39	28	0	0	0	19	0	0	0	0	0	0	0	0	0	0	0	0	0	0	0	0	0	220
denovo3643	D_0__Bacteria; D_1__Tenericutes; D_2__Mollicutes; D_3__Mycoplasmatales; D_4__Mycoplasmataceae; D_5__Mycoplasma; D_6__uncultured bacterium	0	0	0	1	1	0	0	2	0	8	0	0	0	0	0	1	0	145	0	4	0	0	44	0	3	5	0	0	0	0	0	0	2	216
denovo39	Unassigned	0	0	0	0	0	0	115	0	0	5	4	0	1	31	14	0	0	20	23	2	0	0	0	0	0	0	0	0	0	0	0	0	0	215
denovo1294	D_0__Bacteria; D_1__Tenericutes; D_2__Mollicutes; D_3__Mycoplasmatales; D_4__Mycoplasmataceae; D_5__Mycoplasma; D_6__uncultured bacterium	0	0	0	0	0	1	0	0	10	16	0	9	54	0	8	0	0	0	23	0	0	0	0	1	0	0	0	0	0	68	0	0	0	190
denovo5178	D_0__Bacteria; D_1__Tenericutes; D_2__Mollicutes; D_3__Mycoplasmatales; D_4__Mycoplasmataceae; D_5__Mycoplasma; D_6__uncultured bacterium	0	0	33	23	31	1	0	17	5	0	0	0	0	0	0	3	0	0	0	0	0	0	0	0	0	68	0	0	0	0	1	3	0	185
denovo1217	Unassigned	2	0	0	0	0	2	13	0	0	0	0	0	0	0	0	0	1	0	0	0	0	0	0	34	8	0	2	113	0	0	0	1	0	176
denovo5507	D_0__Bacteria; D_1__Tenericutes; D_2__Mollicutes; D_3__Mycoplasmatales; D_4__Mycoplasmataceae; D_5__Mycoplasma; D_6__uncultured bacterium	0	1	1	0	0	0	0	27	13	0	0	1	0	0	0	36	0	0	0	0	0	0	0	0	0	77	0	0	0	0	2	2	0	160
denovo61	D_0__Bacteria; D_1__Tenericutes; D_2__Mollicutes; D_3__Mycoplasmatales; D_4__Mycoplasmataceae; D_5__Mycoplasma; D_6__uncultured bacterium	3	0	2	0	0	1	6	0	4	9	0	2	0	8	4	0	0	0	25	4	0	0	25	2	18	6	0	1	0	0	0	0	37	157
denovo67	D_0__Bacteria; D_1__Tenericutes; D_2__Mollicutes; D_3__Mycoplasmatales; D_4__Mycoplasmataceae; D_5__Mycoplasma; D_6__uncultured bacterium	0	0	1	1	0	0	0	3	0	7	0	0	0	0	4	0	0	24	76	0	0	0	15	0	6	1	0	0	0	0	0	0	17	155
denovo5130	D_0__Bacteria; D_1__Tenericutes; D_2__Mollicutes; D_3__Mycoplasmatales; D_4__Mycoplasmataceae; D_5__Mycoplasma; D_6__uncultured bacterium	0	4	1	14	0	0	0	14	72	0	7	27	0	0	0	14	1	0	0	0	0	0	0	0	0	0	0	0	0	0	0	0	0	154
denovo5503	D_0__Bacteria; D_1__Tenericutes; D_2__Mollicutes; D_3__Mycoplasmatales; D_4__Mycoplasmataceae; D_5__Mycoplasma; D_6__uncultured bacterium	0	4	14	0	0	0	0	17	4	0	0	1	0	0	0	31	0	0	0	0	0	0	0	0	0	76	0	0	0	0	3	2	0	152
denovo3996	D_0__Bacteria; D_1__Tenericutes; D_2__Mollicutes; D_3__Mycoplasmatales; D_4__Mycoplasmataceae; D_5__Mycoplasma; D_6__uncultured bacterium	0	0	0	1	0	1	14	0	37	50	0	16	0	0	0	0	4	0	0	22	0	0	0	0	0	0	0	0	1	0	0	0	0	146
denovo4838	D_0__Bacteria; D_1__Tenericutes; D_2__Mollicutes; D_3__Mycoplasmatales; D_4__Mycoplasmataceae; D_5__Mycoplasma; D_6__uncultured bacterium	1	0	0	2	0	2	0	0	13	0	4	8	0	87	0	5	6	0	0	0	0	0	0	0	0	15	0	0	0	0	0	0	0	143
denovo5602	D_0__Bacteria; D_1__Tenericutes; D_2__Mollicutes; D_3__Mycoplasmatales; D_4__Mycoplasmataceae; D_5__Mycoplasma; D_6__uncultured bacterium	0	1	0	0	0	0	0	0	50	0	5	48	0	0	0	17	0	0	0	0	0	0	0	0	0	13	0	0	0	0	0	0	0	134
denovo2865	D_0__Bacteria; D_1__Tenericutes; D_2__Mollicutes; D_3__Mycoplasmatales; D_4__Mycoplasmataceae; D_5__Mycoplasma; D_6__uncultured bacterium	0	0	0	0	0	1	20	0	0	5	0	0	0	0	11	1	0	0	38	2	0	0	5	1	4	1	0	0	0	0	0	0	44	133
denovo732	D_0__Bacteria; D_1__Proteobacteria; D_2__Alphaproteobacteria; D_3__Rickettsiales; D_4__Anaplasmataceae; D_5__Candidatus Xenohaliotis; D_6__Candidatus Xenohaliotis californiensis	0	0	0	4	0	0	0	0	0	0	0	0	0	0	0	0	0	0	4	0	0	0	5	0	12	52	12	28	2	0	0	0	11	130
denovo7355	Unassigned	0	0	47	0	0	0	0	0	0	0	1	0	0	0	0	0	0	0	0	0	82	0	0	0	0	0	0	0	0	0	0	0	0	130
denovo2919	D_0__Bacteria; D_1__Tenericutes; D_2__Mollicutes; D_3__Mycoplasmatales; D_4__Mycoplasmataceae; D_5__Mycoplasma; D_6__uncultured bacterium	0	0	0	0	0	0	0	0	0	4	2	1	0	4	41	1	0	3	32	24	0	0	3	0	10	0	0	0	0	0	0	0	2	127
denovo4007	D_0__Bacteria; D_1__Tenericutes; D_2__Mollicutes; D_3__Mycoplasmatales; D_4__Mycoplasmataceae; D_5__Mycoplasma; D_6__uncultured bacterium	0	0	2	2	0	0	0	3	2	11	0	4	1	6	0	4	0	11	0	73	0	0	0	0	0	0	0	0	8	0	0	0	0	127
denovo4558	D_0__Bacteria; D_1__Tenericutes; D_2__Mollicutes; D_3__Mycoplasmatales; D_4__Mycoplasmataceae; D_5__Mycoplasma; D_6__uncultured bacterium	0	0	3	81	11	0	0	3	0	0	0	0	0	10	0	2	2	0	0	0	0	0	0	0	0	12	1	0	0	0	1	0	0	126
denovo5277	D_0__Bacteria; D_1__Tenericutes; D_2__Mollicutes; D_3__Mycoplasmatales; D_4__Mycoplasmataceae; D_5__Mycoplasma; D_6__uncultured bacterium	0	0	1	0	1	69	0	0	38	0	0	10	0	0	0	0	5	0	0	0	0	0	0	0	0	1	0	0	0	0	0	0	0	125
denovo2368	D_0__Bacteria; D_1__Fusobacteria; D_2__Fusobacteriia; D_3__Fusobacteriales; D_4__Fusobacteriaceae; D_5__Psychrilyobacter; D_6__uncultured bacterium	0	1	1	33	4	0	6	2	0	0	0	0	0	0	5	0	0	2	1	0	0	0	1	7	0	0	0	0	1	0	0	0	57	121
denovo2050	D_0__Bacteria; D_1__Fusobacteria; D_2__Fusobacteriia; D_3__Fusobacteriales; D_4__Fusobacteriaceae; D_5__Psychrilyobacter; D_6__uncultured bacterium	0	1	0	16	0	0	8	2	0	0	0	0	0	0	5	2	1	0	0	0	1	0	1	11	1	0	0	0	2	0	0	0	67	118
denovo12	D_0__Bacteria; D_1__Tenericutes; D_2__Mollicutes; D_3__Mycoplasmatales; D_4__Mycoplasmataceae; D_5__Mycoplasma; D_6__uncultured bacterium	0	0	0	0	0	0	0	0	0	0	0	0	0	0	0	0	0	0	0	0	0	0	0	0	0	0	0	0	0	0	116	0	0	116
denovo2932	D_0__Bacteria; D_1__Tenericutes; D_2__Mollicutes; D_3__Mycoplasmatales; D_4__Mycoplasmataceae; D_5__Mycoplasma; D_6__uncultured bacterium	0	0	0	3	0	0	1	1	0	3	0	2	0	8	37	0	0	0	40	2	0	0	0	0	6	0	0	0	0	0	0	0	9	112
denovo3521	D_0__Bacteria; D_1__Tenericutes; D_2__Mollicutes; D_3__Mycoplasmatales; D_4__Mycoplasmataceae; D_5__Mycoplasma; D_6__uncultured bacterium	0	0	0	0	0	3	42	0	0	5	0	0	0	1	0	0	5	0	0	1	0	0	13	8	27	4	0	0	0	0	0	0	2	111
denovo5118	Unassigned	28	1	0	0	32	0	0	0	0	0	28	0	0	0	0	0	20	0	0	0	0	0	0	0	0	0	0	0	0	0	0	0	0	109
denovo511	D_0__Bacteria; D_1__Fusobacteria; D_2__Fusobacteriia; D_3__Fusobacteriales; D_4__Fusobacteriaceae; D_5__Psychrilyobacter; D_6__uncultured bacterium	0	2	17	34	0	0	6	5	1	0	0	0	0	0	0	2	0	2	0	0	3	0	2	12	0	0	0	0	1	3	2	0	16	108
denovo2953	D_0__Bacteria; D_1__Tenericutes; D_2__Mollicutes; D_3__Mycoplasmatales; D_4__Mycoplasmataceae; D_5__Mycoplasma; D_6__uncultured bacterium	0	0	0	0	0	0	1	0	0	32	0	4	0	0	55	1	0	7	0	4	0	0	0	1	1	0	0	0	1	0	0	0	1	108
denovo7052	D_0__Bacteria; D_1__Tenericutes; D_2__Mollicutes; D_3__Mycoplasmatales; D_4__Mycoplasmataceae; D_5__Mycoplasma; D_6__uncultured bacterium	0	10	50	0	0	0	0	0	0	0	1	0	0	0	0	0	0	0	0	0	0	0	0	0	0	0	0	0	0	0	10	37	0	108
denovo3722	D_0__Bacteria; D_1__Tenericutes; D_2__Mollicutes; D_3__Mycoplasmatales; D_4__Mycoplasmataceae; D_5__Mycoplasma; D_6__uncultured bacterium	0	0	0	0	0	0	14	0	0	7	0	0	2	2	0	0	0	0	0	4	0	3	64	0	11	0	0	0	0	0	0	0	0	107
denovo121	D_0__Bacteria; D_1__Tenericutes; D_2__Mollicutes; D_3__Mycoplasmatales; D_4__Mycoplasmataceae; D_5__Mycoplasma; D_6__uncultured bacterium	0	0	2	0	0	4	0	0	4	42	0	7	19	1	3	0	11	0	2	0	0	0	0	0	0	0	0	0	0	11	0	0	0	106
denovo2951	D_0__Bacteria; D_1__Tenericutes; D_2__Mollicutes; D_3__Mycoplasmatales; D_4__Mycoplasmataceae; D_5__Mycoplasma; D_6__uncultured bacterium	1	0	0	1	0	1	3	1	3	1	0	0	0	1	31	0	0	1	0	0	0	0	13	1	12	0	0	0	0	0	0	0	36	106
denovo597	D_0__Bacteria; D_1__Tenericutes; D_2__Mollicutes; D_3__Mycoplasmatales; D_4__Mycoplasmataceae; D_5__Mycoplasma; D_6__uncultured bacterium	0	0	0	0	0	0	0	0	0	0	0	0	3	2	18	0	0	0	74	1	0	0	1	1	5	0	0	0	0	0	0	0	0	105
denovo72	D_0__Bacteria; D_1__Tenericutes; D_2__Mollicutes; D_3__Mycoplasmatales; D_4__Mycoplasmataceae; D_5__Mycoplasma; D_6__uncultured bacterium	0	0	10	8	1	0	0	4	0	2	0	0	0	4	4	4	0	15	36	0	0	0	12	0	2	0	0	0	0	1	0	0	2	105
denovo2623	D_0__Bacteria; D_1__Tenericutes; D_2__Mollicutes; D_3__Mycoplasmatales; D_4__Mycoplasmataceae; D_5__Mycoplasma; D_6__uncultured bacterium	0	0	0	0	0	0	0	1	1	3	0	2	34	0	7	0	0	3	39	12	0	0	0	0	0	0	0	0	1	0	0	0	1	104
denovo3485	Unassigned	0	0	0	0	0	1	4	0	0	1	0	0	0	2	0	0	1	2	0	0	0	1	21	0	12	0	0	0	0	0	0	0	57	102
denovo5390	D_0__Bacteria; D_1__Tenericutes; D_2__Mollicutes; D_3__Mycoplasmatales; D_4__Mycoplasmataceae; D_5__Mycoplasma; D_6__uncultured bacterium	0	3	14	0	2	0	0	22	3	0	0	3	0	0	0	15	0	0	0	0	0	0	0	0	0	31	0	0	0	0	5	0	0	98
denovo4988	D_0__Bacteria; D_1__Fusobacteria; D_2__Fusobacteriia; D_3__Fusobacteriales; D_4__Fusobacteriaceae; D_5__Psychrilyobacter; D_6__uncultured bacterium	0	1	4	67	0	0	0	1	0	0	0	0	0	0	0	0	0	0	0	0	18	0	0	0	0	0	0	0	0	0	1	0	0	92
denovo9	D_0__Bacteria; D_1__Tenericutes; D_2__Mollicutes; D_3__Mycoplasmatales; D_4__Mycoplasmataceae; D_5__Mycoplasma; D_6__uncultured bacterium	0	0	0	0	0	0	0	0	0	0	0	0	0	0	0	0	0	0	0	0	92	0	0	0	0	0	0	0	0	0	0	0	0	92
denovo2699	D_0__Bacteria; D_1__Tenericutes; D_2__Mollicutes; D_3__Mycoplasmatales; D_4__Mycoplasmataceae; D_5__Mycoplasma; D_6__uncultured bacterium	0	1	1	3	0	3	10	0	1	10	0	2	9	1	10	0	3	0	25	0	0	0	6	2	0	0	0	0	0	0	0	0	2	89
denovo3436	D_0__Bacteria; D_1__Tenericutes; D_2__Mollicutes; D_3__Mycoplasmatales; D_4__Mycoplasmataceae; D_5__Mycoplasma; D_6__uncultured bacterium	0	0	0	0	0	0	0	0	0	2	0	0	0	0	0	1	0	0	0	0	0	2	7	1	26	0	0	0	0	0	0	0	50	89
denovo4234	D_0__Bacteria; D_1__Tenericutes; D_2__Mollicutes; D_3__Mycoplasmatales; D_4__Mycoplasmataceae; D_5__Mycoplasma; D_6__uncultured bacterium	0	1	0	1	2	0	0	5	0	0	0	0	0	8	0	6	1	44	0	0	0	0	0	0	0	20	0	0	0	0	0	0	0	88
denovo1303	D_0__Bacteria; D_1__Tenericutes; D_2__Mollicutes; D_3__Mycoplasmatales; D_4__Mycoplasmataceae; D_5__Mycoplasma; D_6__uncultured bacterium	0	1	2	0	0	0	0	0	1	1	0	0	3	0	8	0	0	7	36	2	0	0	0	0	0	0	0	0	3	21	0	0	0	85
denovo184	D_0__Bacteria; D_1__Tenericutes; D_2__Mollicutes; D_3__Mycoplasmatales; D_4__Mycoplasmataceae; D_5__Mycoplasma; D_6__uncultured bacterium	0	0	0	0	0	0	0	0	0	0	0	0	1	0	1	4	0	17	20	0	0	0	7	0	0	7	0	3	0	0	14	2	8	84
denovo34	D_0__Bacteria; D_1__Proteobacteria; D_2__Gammaproteobacteria; D_3__Vibrionales; D_4__Vibrionaceae; D_5__Vibrio	0	2	0	0	0	0	0	0	0	0	0	0	0	0	0	0	0	0	0	0	3	23	5	0	2	0	0	1	1	10	8	0	28	83
denovo1749	Unassigned	70	0	0	0	0	0	0	0	0	0	0	0	0	0	0	3	0	0	0	0	0	0	0	0	0	0	0	0	0	0	0	0	10	83
denovo217	D_0__Bacteria; D_1__Tenericutes; D_2__Mollicutes; D_3__Mycoplasmatales; D_4__Mycoplasmataceae; D_5__Mycoplasma; D_6__uncultured bacterium	0	0	0	0	0	0	0	1	0	3	0	0	1	0	10	1	0	18	37	3	0	0	0	0	3	0	0	0	1	2	0	0	0	80
denovo1004	D_0__Bacteria; D_1__Tenericutes; D_2__Mollicutes; D_3__Mycoplasmatales; D_4__Mycoplasmataceae; D_5__Mycoplasma; D_6__uncultured bacterium	0	0	0	0	0	0	4	0	0	0	0	0	0	0	10	0	0	1	50	1	0	0	2	0	3	0	0	0	0	0	0	0	8	79
denovo3432	D_0__Bacteria; D_1__Tenericutes; D_2__Mollicutes; D_3__Mycoplasmatales; D_4__Mycoplasmataceae; D_5__Mycoplasma; D_6__uncultured bacterium	0	0	1	4	1	0	7	0	0	0	0	0	0	0	0	2	0	0	0	0	0	0	3	1	2	4	0	0	3	0	0	0	51	79
denovo1228	Unassigned	0	0	0	0	0	0	1	0	0	0	0	0	0	0	0	0	14	0	0	0	0	0	0	13	13	0	1	36	0	0	0	0	0	78
denovo120	D_0__Bacteria; D_1__Tenericutes; D_2__Mollicutes; D_3__Mycoplasmatales; D_4__Mycoplasmataceae; D_5__Mycoplasma; D_6__uncultured bacterium	0	1	1	4	0	0	0	3	2	0	0	1	0	3	1	9	2	8	19	2	0	0	7	0	3	6	0	0	0	0	0	0	5	77
denovo980	D_0__Bacteria; D_1__Tenericutes; D_2__Mollicutes; D_3__Mycoplasmatales; D_4__Mycoplasmataceae; D_5__Mycoplasma; D_6__uncultured bacterium	0	0	0	0	0	0	0	0	0	1	2	0	4	6	12	0	0	2	6	4	0	0	0	0	1	0	0	0	3	35	0	0	0	76
denovo99	Unassigned	0	0	0	0	0	11	15	31	0	1	0	0	1	9	6	1	0	0	1	0	0	0	0	0	0	0	0	0	0	0	0	0	0	76
denovo2895	D_0__Bacteria; D_1__Tenericutes; D_2__Mollicutes; D_3__Mycoplasmatales; D_4__Mycoplasmataceae; D_5__Mycoplasma; D_6__uncultured bacterium	0	0	2	6	0	0	0	1	1	0	0	0	0	0	23	1	0	2	11	0	0	0	4	0	2	3	0	0	0	0	0	0	19	75
denovo2885	D_0__Bacteria; D_1__Fusobacteria; D_2__Fusobacteriia; D_3__Fusobacteriales; D_4__Fusobacteriaceae; D_5__Psychrilyobacter; D_6__uncultured bacterium	0	0	0	5	0	0	1	1	0	0	0	0	0	0	1	0	1	0	0	0	0	0	2	3	0	0	0	0	1	0	0	0	59	74
denovo6506	D_0__Bacteria; D_1__Fusobacteria; D_2__Fusobacteriia; D_3__Fusobacteriales; D_4__Fusobacteriaceae; D_5__Psychrilyobacter; D_6__uncultured bacterium	0	12	2	0	0	0	0	0	0	0	0	0	0	0	0	0	0	0	0	0	30	0	0	0	0	0	0	0	0	0	29	0	0	73
denovo192	D_0__Bacteria; D_1__Tenericutes; D_2__Mollicutes; D_3__Mycoplasmatales; D_4__Mycoplasmataceae; D_5__Mycoplasma; D_6__uncultured bacterium	1	0	0	0	0	1	11	0	1	6	0	1	7	0	1	0	4	1	3	0	0	0	5	5	15	0	0	1	0	1	0	0	8	72
denovo2941	D_0__Bacteria; D_1__Tenericutes; D_2__Mollicutes; D_3__Mycoplasmatales; D_4__Mycoplasmataceae; D_5__Mycoplasma; D_6__uncultured bacterium	0	0	0	0	0	0	1	0	0	1	0	0	0	0	7	0	0	1	3	3	0	0	1	0	46	0	0	0	0	0	0	0	9	72
denovo3272	D_0__Bacteria; D_1__Tenericutes; D_2__Mollicutes; D_3__Mycoplasmatales; D_4__Mycoplasmataceae; D_5__Mycoplasma; D_6__uncultured bacterium	0	0	0	0	0	0	2	5	0	4	0	1	0	8	0	0	1	3	0	10	0	0	8	7	11	0	0	0	0	0	0	0	12	72
denovo3309	Unassigned	2	0	3	0	0	0	3	7	1	0	0	0	0	1	0	1	1	0	0	0	3	11	26	3	8	0	0	0	0	0	0	0	2	72
denovo3475	D_0__Bacteria; D_1__Tenericutes; D_2__Mollicutes; D_3__Mycoplasmatales; D_4__Mycoplasmataceae; D_5__Mycoplasma; D_6__uncultured bacterium	0	0	0	3	0	0	0	0	0	1	0	1	0	0	0	0	0	4	0	0	0	0	1	0	8	0	0	0	0	0	0	1	52	71
denovo3617	D_0__Bacteria; D_1__Tenericutes; D_2__Mollicutes; D_3__Mycoplasmatales; D_4__Mycoplasmataceae; D_5__Mycoplasma; D_6__uncultured bacterium	0	0	0	2	1	0	0	2	3	4	0	4	0	2	0	7	0	41	0	2	0	0	1	0	0	0	0	0	2	0	0	0	0	71
denovo2632	D_0__Bacteria; D_1__Tenericutes; D_2__Mollicutes; D_3__Mycoplasmatales; D_4__Mycoplasmataceae; D_5__Mycoplasma; D_6__uncultured bacterium	0	0	1	0	0	0	1	0	0	0	1	1	4	0	15	1	0	0	40	0	0	1	2	0	2	0	0	0	0	0	0	0	1	70
denovo3552	D_0__Bacteria; D_1__Tenericutes; D_2__Mollicutes; D_3__Mycoplasmatales; D_4__Mycoplasmataceae; D_5__Mycoplasma; D_6__uncultured bacterium	1	0	0	1	0	0	4	0	0	6	0	0	0	0	0	0	0	2	0	4	0	0	11	5	34	0	0	0	0	0	0	0	2	70
denovo2637	D_0__Bacteria; D_1__Tenericutes; D_2__Mollicutes; D_3__Mycoplasmatales; D_4__Mycoplasmataceae; D_5__Mycoplasma; D_6__uncultured bacterium	0	2	0	0	0	0	0	0	0	2	0	0	13	3	16	0	0	0	26	2	0	0	3	0	1	0	0	0	0	0	0	0	1	69
denovo3433	D_0__Bacteria; D_1__Tenericutes; D_2__Mollicutes; D_3__Mycoplasmatales; D_4__Mycoplasmataceae; D_5__Mycoplasma; D_6__uncultured bacterium	0	0	8	15	1	0	0	2	0	0	0	0	0	5	0	4	2	2	0	1	0	0	4	0	1	4	0	0	0	0	0	0	19	68
denovo27	D_0__Bacteria; D_1__Tenericutes; D_2__Mollicutes; D_3__Mycoplasmatales; D_4__Mycoplasmataceae; D_5__Mycoplasma; D_6__uncultured bacterium	0	0	0	0	0	0	0	0	0	0	0	0	0	0	0	0	0	0	0	0	0	3	0	41	0	0	1	14	1	1	0	0	0	61
denovo5111	Unassigned	4	1	1	6	0	0	0	20	4	0	0	2	0	0	0	3	20	0	0	0	0	0	0	0	0	0	0	0	0	0	0	0	0	61
denovo1319	D_0__Bacteria; D_1__Tenericutes; D_2__Mollicutes; D_3__Mycoplasmatales; D_4__Mycoplasmataceae; D_5__Mycoplasma; D_6__uncultured bacterium	0	0	0	0	0	0	0	1	4	0	1	2	7	2	3	0	0	0	2	2	0	0	0	0	0	0	0	0	0	36	0	0	0	60
denovo936	D_0__Bacteria; D_1__Fusobacteria; D_2__Fusobacteriia; D_3__Fusobacteriales; D_4__Fusobacteriaceae; D_5__Psychrilyobacter; D_6__uncultured bacterium	0	0	0	1	0	0	0	5	0	0	0	0	0	0	3	0	0	0	0	0	0	0	0	0	1	0	0	0	1	1	0	1	45	58
denovo3692	D_0__Bacteria; D_1__Tenericutes; D_2__Mollicutes; D_3__Mycoplasmatales; D_4__Mycoplasmataceae; D_5__Mycoplasma; D_6__uncultured bacterium	0	0	0	0	0	0	1	0	0	36	0	1	2	0	0	0	0	4	0	7	0	0	2	0	3	0	0	0	1	0	0	0	1	58
denovo4052	Unassigned	1	0	0	1	0	1	41	7	0	0	0	0	0	3	0	1	3	0	0	0	0	0	0	0	0	0	0	0	0	0	0	0	0	58
denovo211	Unassigned	0	0	0	1	0	0	18	0	0	0	0	1	0	1	1	7	0	0	7	0	4	3	8	0	2	0	0	0	0	0	0	0	3	56
denovo4501	D_0__Bacteria; D_1__Tenericutes; D_2__Mollicutes; D_3__Mycoplasmatales; D_4__Mycoplasmataceae; D_5__Mycoplasma; D_6__uncultured bacterium	0	0	2	17	1	0	0	10	1	0	0	0	0	13	0	1	0	0	0	0	0	0	0	0	0	10	0	0	0	0	0	0	0	55
denovo5379	D_0__Bacteria; D_1__Tenericutes; D_2__Mollicutes; D_3__Mycoplasmatales; D_4__Mycoplasmataceae; D_5__Mycoplasma; D_6__uncultured bacterium	0	0	0	0	5	9	0	14	9	0	1	2	0	0	0	6	0	0	0	0	0	0	0	0	0	9	0	0	0	0	0	0	0	55
denovo2929	Unassigned	0	0	0	0	0	0	0	0	1	1	0	0	0	0	3	0	1	1	28	0	0	0	4	0	4	0	0	0	0	0	0	0	11	54
denovo2936	D_0__Bacteria; D_1__Tenericutes; D_2__Mollicutes; D_3__Mycoplasmatales; D_4__Mycoplasmataceae; D_5__Mycoplasma; D_6__uncultured bacterium	0	0	0	4	0	0	0	1	0	0	0	0	0	2	5	2	0	2	26	1	0	0	2	2	1	2	0	0	0	0	0	0	3	53
denovo2811	D_0__Bacteria; D_1__Tenericutes; D_2__Mollicutes; D_3__Mycoplasmatales; D_4__Mycoplasmataceae; D_5__Mycoplasma; D_6__uncultured bacterium	0	0	0	0	0	0	0	0	2	0	0	0	34	1	2	0	0	2	4	3	0	0	1	0	1	0	0	0	2	0	0	0	0	52
denovo40	D_0__Bacteria; D_1__Tenericutes; D_2__Mollicutes; D_3__Mycoplasmatales; D_4__Mycoplasmataceae; D_5__Mycoplasma; D_6__uncultured bacterium	0	1	0	0	0	0	0	0	0	2	1	0	0	3	0	0	0	0	3	0	0	0	0	0	8	1	0	0	0	8	0	0	25	52
denovo133	D_0__Bacteria; D_1__Fusobacteria; D_2__Fusobacteriia; D_3__Fusobacteriales; D_4__Fusobacteriaceae; D_5__Propionigenium; Ambiguous_taxa	0	12	17	4	10	0	0	1	0	0	0	0	0	0	0	0	0	0	0	0	0	0	0	0	0	0	0	0	1	3	0	2	0	50
denovo1246	Unassigned	3	0	0	0	0	2	4	0	0	0	0	0	0	0	0	0	1	0	0	0	0	0	0	17	1	0	1	21	0	0	0	0	0	50
denovo2570	D_0__Bacteria; D_1__Tenericutes; D_2__Mollicutes; D_3__Mycoplasmatales; D_4__Mycoplasmataceae; D_5__Mycoplasma; D_6__uncultured bacterium	0	0	0	0	0	0	0	1	1	0	0	0	0	0	5	0	0	16	20	1	0	0	2	0	0	1	0	0	0	0	0	0	1	48
denovo3573	D_0__Bacteria; D_1__Tenericutes; D_2__Mollicutes; D_3__Mycoplasmatales; D_4__Mycoplasmataceae; D_5__Mycoplasma; D_6__uncultured bacterium	0	0	1	9	2	0	0	1	0	1	0	0	0	4	0	1	0	3	0	2	0	0	8	0	1	7	0	0	1	0	0	0	6	47
denovo118	D_0__Bacteria; D_1__Tenericutes; D_2__Mollicutes; D_3__Mycoplasmatales; D_4__Mycoplasmataceae; D_5__Mycoplasma; D_6__uncultured bacterium	0	0	0	0	0	0	0	0	0	1	5	0	1	0	4	0	0	0	2	19	0	0	0	0	4	0	0	0	0	5	0	0	5	46
denovo2503	Unassigned	0	0	0	0	0	0	22	1	0	0	0	0	0	1	2	0	0	0	9	0	0	0	2	1	1	0	0	0	0	0	0	0	7	46
denovo333	Unassigned	0	0	0	0	0	1	3	0	0	0	0	0	0	0	0	0	1	0	0	0	0	0	0	4	4	0	0	33	0	0	0	0	0	46
denovo3470	Unassigned	0	0	0	1	0	0	11	10	0	0	0	1	0	1	0	8	4	0	0	0	0	0	2	0	0	0	0	0	0	0	0	0	7	45
denovo1795	D_0__Bacteria; D_1__Tenericutes; D_2__Mollicutes; D_3__Mycoplasmatales; D_4__Mycoplasmataceae; D_5__Mycoplasma; D_6__uncultured bacterium	0	0	1	4	0	0	0	2	0	0	0	0	0	2	4	1	0	5	10	0	5	0	1	4	0	3	0	0	1	0	0	0	1	44
denovo2753	D_0__Bacteria; D_1__Tenericutes; D_2__Mollicutes; D_3__Mycoplasmatales; D_4__Mycoplasmataceae; D_5__Mycoplasma; D_6__uncultured bacterium	0	0	0	0	0	0	0	0	0	0	0	0	0	0	0	0	0	0	0	0	0	4	0	36	0	0	4	0	0	0	0	0	0	44
denovo255	D_0__Bacteria; D_1__Tenericutes; D_2__Mollicutes; D_3__Mycoplasmatales; D_4__Mycoplasmataceae; D_5__Mycoplasma; D_6__uncultured bacterium	0	0	0	1	0	0	0	1	0	0	0	1	1	2	0	6	0	1	24	1	0	0	1	0	0	1	0	1	0	1	0	0	1	43
denovo3016	D_0__Bacteria; D_1__Tenericutes; D_2__Mollicutes; D_3__Mycoplasmatales; D_4__Mycoplasmataceae; D_5__Mycoplasma; D_6__uncultured bacterium	0	0	1	0	0	0	0	0	0	2	0	0	0	0	0	0	0	18	0	0	0	0	3	0	9	0	0	0	0	0	1	0	9	43
denovo629	Unassigned	0	1	1	17	0	0	0	4	0	0	2	0	0	3	0	0	3	0	1	0	1	0	0	0	2	0	0	0	0	2	0	1	4	42
denovo2942	D_0__Bacteria; D_1__Tenericutes; D_2__Mollicutes; D_3__Mycoplasmatales; D_4__Mycoplasmataceae; D_5__Mycoplasma; D_6__uncultured bacterium	0	0	0	0	1	0	0	1	0	1	0	0	0	2	6	0	0	21	1	0	0	0	2	0	2	0	0	0	0	0	0	1	2	40
denovo5345	D_0__Bacteria; D_1__Fusobacteria; D_2__Fusobacteriia; D_3__Fusobacteriales; D_4__Fusobacteriaceae; D_5__Psychrilyobacter; D_6__uncultured bacterium	0	3	1	0	1	0	0	11	1	0	0	0	0	0	0	5	0	0	0	0	0	0	0	0	0	1	0	0	0	0	16	0	0	39
denovo65	D_0__Bacteria; D_1__Tenericutes; D_2__Mollicutes; D_3__Mycoplasmatales; D_4__Mycoplasmataceae; D_5__Mycoplasma; D_6__uncultured bacterium	0	1	2	0	1	0	0	0	0	3	0	0	0	0	0	0	0	3	20	0	0	0	7	0	0	1	0	0	0	0	0	0	1	39
denovo74	D_0__Bacteria; D_1__Tenericutes; D_2__Mollicutes; D_3__Mycoplasmatales; D_4__Mycoplasmataceae; D_5__Mycoplasma; D_6__uncultured bacterium	0	0	0	0	0	0	0	0	0	0	0	0	0	0	0	0	0	0	0	0	7	2	0	17	0	0	0	9	2	2	0	0	0	39
denovo3876	Unassigned	4	0	0	0	5	1	3	0	0	0	0	0	0	0	0	0	7	0	0	0	0	0	0	7	6	0	6	0	0	0	0	0	0	39
denovo2243	D_0__Bacteria; D_1__Tenericutes; D_2__Mollicutes; D_3__Mycoplasmatales; D_4__Mycoplasmataceae; D_5__Mycoplasma; D_6__uncultured bacterium	0	0	0	0	0	1	0	0	0	0	0	0	5	0	0	0	2	0	6	0	0	0	0	2	1	3	0	0	0	0	0	0	18	38
denovo2862	D_0__Bacteria; D_1__Tenericutes; D_2__Mollicutes; D_3__Mycoplasmatales; D_4__Mycoplasmataceae; D_5__Mycoplasma; D_6__uncultured bacterium	0	0	1	0	0	0	0	0	0	1	0	0	0	0	5	1	0	4	18	0	0	0	6	0	1	0	0	0	0	0	0	0	1	38
denovo3716	D_0__Bacteria; D_1__Tenericutes; D_2__Mollicutes; D_3__Mycoplasmatales; D_4__Mycoplasmataceae; D_5__Mycoplasma; D_6__uncultured bacterium	0	0	1	11	0	0	0	0	0	5	0	0	0	4	0	0	1	2	0	0	0	0	9	0	0	3	0	0	1	0	1	0	0	38
denovo4918	D_0__Bacteria; D_1__Tenericutes; D_2__Mollicutes; D_3__Mycoplasmatales; D_4__Mycoplasmataceae; D_5__Mycoplasma; D_6__uncultured bacterium	5	0	0	7	1	0	0	0	0	0	0	0	0	14	0	1	4	0	0	0	0	0	0	0	0	6	0	0	0	0	0	0	0	38
denovo2867	D_0__Bacteria; D_1__Proteobacteria; D_2__Gammaproteobacteria; D_3__Vibrionales; D_4__Vibrionaceae; D_5__Vibrio	0	1	1	5	3	0	0	0	0	0	0	0	0	7	7	0	0	1	2	0	0	0	9	0	1	0	0	0	0	0	0	0	0	37
denovo156	D_0__Bacteria; D_1__Tenericutes; D_2__Mollicutes; D_3__Mycoplasmatales; D_4__Mycoplasmataceae; D_5__Mycoplasma; D_6__uncultured bacterium	0	0	1	0	0	0	0	0	4	0	2	1	6	1	4	0	2	0	0	11	0	0	0	0	1	0	0	0	0	4	0	0	0	37
denovo2603	D_0__Bacteria; D_1__Tenericutes; D_2__Mollicutes; D_3__Mycoplasmatales; D_4__Mycoplasmataceae; D_5__Mycoplasma; D_6__uncultured bacterium	0	0	0	1	1	0	0	0	0	0	1	0	0	2	12	0	0	0	8	2	0	0	4	0	0	0	0	0	0	0	0	0	5	36
denovo7643	D_0__Bacteria; D_1__Fusobacteria; D_2__Fusobacteriia; D_3__Fusobacteriales; D_4__Fusobacteriaceae; D_5__Psychrilyobacter; D_6__uncultured bacterium	0	0	6	0	0	0	0	0	0	0	0	0	0	0	0	0	0	0	0	0	17	0	0	0	0	0	0	0	0	0	11	1	0	35
denovo2602	D_0__Bacteria; D_1__Tenericutes; D_2__Mollicutes; D_3__Mycoplasmatales; D_4__Mycoplasmataceae; D_5__Mycoplasma; D_6__uncultured bacterium	0	0	0	0	1	0	0	3	0	0	0	1	1	3	1	5	0	2	16	0	0	0	0	0	0	0	0	0	0	0	0	0	2	35
denovo3849	D_0__Bacteria; D_1__Tenericutes; D_2__Mollicutes; D_3__Mycoplasmatales; D_4__Mycoplasmataceae; D_5__Mycoplasma; D_6__uncultured bacterium	0	0	1	4	0	0	0	0	0	3	0	0	0	2	0	2	0	2	0	1	0	0	0	0	16	3	0	0	1	0	0	0	0	35
denovo4397	D_0__Bacteria; D_1__Tenericutes; D_2__Mollicutes; D_3__Mycoplasmatales; D_4__Mycoplasmataceae; D_5__Mycoplasma; D_6__uncultured bacterium	0	3	1	1	0	0	0	2	0	0	1	4	0	8	0	10	0	0	0	0	0	0	0	0	0	2	0	0	3	0	0	0	0	35
denovo5769	D_0__Bacteria; D_1__Tenericutes; D_2__Mollicutes; D_3__Mycoplasmatales; D_4__Mycoplasmataceae; D_5__Mycoplasma; D_6__uncultured bacterium	0	0	1	0	0	0	0	0	0	0	1	10	0	0	0	2	0	0	0	0	3	0	0	0	0	18	0	0	0	0	0	0	0	35
denovo2627	Unassigned	0	0	0	1	0	0	0	3	0	2	0	0	1	1	5	2	0	4	12	0	0	0	0	0	2	1	0	0	0	0	0	0	1	35
denovo1066	D_0__Bacteria; D_1__Tenericutes; D_2__Mollicutes; D_3__Mycoplasmatales; D_4__Mycoplasmataceae; D_5__Mycoplasma; D_6__uncultured bacterium	0	0	0	0	0	0	0	0	0	0	0	0	0	0	0	0	0	0	0	0	0	0	0	2	0	0	0	27	0	5	0	0	0	34
denovo3555	D_0__Bacteria; D_1__Tenericutes; D_2__Mollicutes; D_3__Mycoplasmatales; D_4__Mycoplasmataceae; D_5__Mycoplasma; D_6__uncultured bacterium	0	0	1	1	0	0	1	0	0	6	1	0	0	0	0	0	0	3	0	3	0	0	1	0	15	0	0	0	1	0	0	0	1	34
denovo37	Unassigned	0	0	0	0	0	0	0	0	0	0	0	0	0	0	0	0	0	0	0	0	33	0	0	0	0	0	0	0	0	0	0	0	0	33
denovo49	Unassigned	0	0	0	0	0	0	4	0	7	0	0	0	1	0	0	0	0	0	0	0	1	0	20	0	0	0	0	0	0	0	0	0	0	33
denovo987	D_0__Bacteria; D_1__Tenericutes; D_2__Mollicutes; D_3__Mycoplasmatales; D_4__Mycoplasmataceae; D_5__Mycoplasma; D_6__uncultured bacterium	0	0	0	0	0	0	0	0	0	0	0	0	0	0	0	0	0	0	0	0	0	0	0	1	0	0	0	25	0	5	0	0	0	31
denovo258	D_0__Bacteria; D_1__Tenericutes; D_2__Mollicutes; D_3__Mycoplasmatales; D_4__Mycoplasmataceae; D_5__Mycoplasma; D_6__uncultured bacterium	0	0	0	1	0	0	0	0	0	0	1	0	1	0	3	0	0	0	8	0	0	0	0	0	2	1	0	3	2	0	0	0	8	30
denovo2937	D_0__Bacteria; D_1__Tenericutes; D_2__Mollicutes; D_3__Mycoplasmatales; D_4__Mycoplasmataceae; D_5__Mycoplasma; D_6__uncultured bacterium	0	1	0	0	0	0	0	1	0	0	1	1	0	5	4	3	0	5	5	1	0	0	1	0	0	0	0	0	0	0	0	0	1	29
denovo2964	D_0__Bacteria; D_1__Tenericutes; D_2__Mollicutes; D_3__Mycoplasmatales; D_4__Mycoplasmataceae; D_5__Mycoplasma; D_6__uncultured bacterium	0	0	0	1	0	0	0	0	0	2	1	0	0	6	4	1	0	2	0	9	0	0	0	0	2	0	0	0	1	0	0	0	0	29
denovo1807	D_0__Bacteria; D_1__Tenericutes; D_2__Mollicutes; D_3__Mycoplasmatales; D_4__Mycoplasmataceae; D_5__Mycoplasma; D_6__uncultured bacterium	0	0	0	0	0	0	0	1	0	0	0	0	1	1	1	0	0	0	16	0	1	0	1	5	0	1	0	0	0	0	0	0	0	28
denovo5011	Unassigned	0	0	0	15	0	0	0	3	0	0	2	0	0	0	0	1	1	0	0	0	4	0	0	0	0	0	0	0	0	0	0	0	0	26
denovo2377	D_0__Bacteria; D_1__Tenericutes; D_2__Mollicutes; D_3__Mycoplasmatales; D_4__Mycoplasmataceae; D_5__Mycoplasma; D_6__uncultured bacterium	0	0	0	0	0	0	0	0	0	0	0	0	0	0	0	0	0	0	0	0	0	1	0	24	0	0	0	0	0	0	0	0	0	25
denovo294	Unassigned	0	0	2	0	0	0	1	1	0	0	0	1	0	0	0	0	1	0	8	0	5	0	2	0	2	0	0	0	0	0	0	0	2	25
denovo3838	Unassigned	1	0	0	0	0	0	2	6	0	0	0	0	0	1	0	0	0	0	0	0	0	2	0	0	13	0	0	0	0	0	0	0	0	25
denovo3628	D_0__Bacteria; D_1__Tenericutes; D_2__Mollicutes; D_3__Mycoplasmatales; D_4__Mycoplasmataceae; D_5__Mycoplasma; D_6__uncultured bacterium	0	0	0	1	0	0	0	0	1	2	1	0	0	2	0	0	0	8	0	5	0	0	0	0	2	0	0	0	1	0	0	0	1	24
denovo4119	D_0__Bacteria; D_1__Tenericutes; D_2__Mollicutes; D_3__Mycoplasmatales; D_4__Mycoplasmataceae; D_5__Mycoplasma; D_6__uncultured bacterium	0	0	0	2	0	0	0	0	0	2	0	0	0	1	0	4	1	5	0	0	0	0	0	0	0	9	0	0	0	0	0	0	0	24
denovo7386	Unassigned	0	0	20	0	0	0	0	0	0	0	1	0	0	0	0	0	0	0	0	0	3	0	0	0	0	0	0	0	0	0	0	0	0	24
denovo1680	Unassigned	0	0	1	0	0	0	0	0	0	0	0	0	1	1	0	3	0	0	2	0	0	1	12	0	1	0	0	0	0	0	0	0	1	23
denovo28	Unassigned	0	0	0	0	0	5	1	12	0	0	0	0	0	3	1	0	0	0	1	0	0	0	0	0	0	0	0	0	0	0	0	0	0	23
denovo259	D_0__Bacteria; D_1__Tenericutes; D_2__Mollicutes; D_3__Mycoplasmatales; D_4__Mycoplasmataceae; D_5__Mycoplasma; D_6__uncultured bacterium	0	0	1	0	0	0	1	0	0	2	0	0	2	0	5	0	0	0	8	0	0	0	2	1	0	0	0	0	0	0	0	0	0	22
denovo4891	D_0__Bacteria; D_1__Tenericutes; D_2__Mollicutes; D_3__Mycoplasmatales; D_4__Mycoplasmataceae; D_5__Mycoplasma; D_6__uncultured bacterium	0	0	1	8	0	0	0	4	0	0	0	0	0	4	0	3	0	0	0	0	0	0	0	0	0	2	0	0	0	0	0	0	0	22
denovo1569	D_0__Bacteria; D_1__Tenericutes; D_2__Mollicutes; D_3__Mycoplasmatales; D_4__Mycoplasmataceae; D_5__Mycoplasma; D_6__uncultured bacterium	0	0	0	0	0	0	0	0	0	0	0	0	0	0	5	0	0	0	11	1	0	0	2	1	0	0	0	0	0	0	0	0	0	20
denovo2615	D_0__Bacteria; D_1__Tenericutes; D_2__Mollicutes; D_3__Mycoplasmatales; D_4__Mycoplasmataceae; D_5__Mycoplasma; D_6__uncultured bacterium	0	0	0	0	0	0	0	0	0	2	0	0	0	0	1	0	0	0	10	0	0	0	2	0	2	3	0	0	0	0	0	0	0	20
denovo3453	Unassigned	0	0	0	0	0	0	1	0	0	0	0	0	0	0	0	0	0	0	0	0	0	4	7	0	4	0	0	0	0	0	0	0	4	20
denovo6533	Unassigned	0	0	13	0	0	0	0	0	0	0	0	0	0	0	0	0	0	0	0	0	6	0	0	0	0	0	0	0	0	0	0	0	0	19
denovo5282	D_0__Bacteria; D_1__Fusobacteria; D_2__Fusobacteriia; D_3__Fusobacteriales; D_4__Fusobacteriaceae; D_5__Psychrilyobacter; D_6__uncultured bacterium	0	0	2	0	0	0	0	4	0	0	0	0	0	0	0	7	0	0	0	0	3	0	0	0	0	0	0	0	0	0	2	0	0	18
denovo6073	D_0__Bacteria; D_1__Tenericutes; D_2__Mollicutes; D_3__Mycoplasmatales; D_4__Mycoplasmataceae; D_5__Mycoplasma; D_6__uncultured bacterium	0	4	5	0	0	0	0	0	0	0	0	6	0	0	0	0	0	0	0	0	0	0	0	0	0	0	0	0	0	0	3	0	0	18
denovo5793	Unassigned	0	0	6	0	0	0	0	0	0	0	0	1	0	0	0	0	0	0	0	0	11	0	0	0	0	0	0	0	0	0	0	0	0	18
denovo46	Unassigned	0	2	2	6	0	0	0	2	0	0	0	0	0	2	0	0	2	0	0	0	0	0	0	0	0	1	0	0	0	0	0	0	0	17
denovo3915	D_0__Bacteria; D_1__Fusobacteria; D_2__Fusobacteriia; D_3__Fusobacteriales; D_4__Fusobacteriaceae; D_5__Psychrilyobacter; D_6__uncultured bacterium	0	0	1	5	0	0	1	0	0	0	0	0	0	0	0	1	0	4	0	0	0	0	0	4	0	0	0	0	0	0	0	0	0	16
denovo5322	D_0__Bacteria; D_1__Fusobacteria; D_2__Fusobacteriia; D_3__Fusobacteriales; D_4__Fusobacteriaceae; D_5__Psychrilyobacter; D_6__uncultured bacterium	0	1	5	0	3	0	0	1	3	0	0	0	0	0	0	2	0	0	0	0	1	0	0	0	0	0	0	0	0	0	0	0	0	16
denovo2405	D_0__Bacteria; D_1__Tenericutes; D_2__Mollicutes; D_3__Mycoplasmatales; D_4__Mycoplasmataceae; D_5__Mycoplasma; D_6__uncultured bacterium	0	0	0	3	0	0	0	0	0	2	0	0	0	1	0	0	0	7	1	0	0	0	0	0	0	1	1	0	0	0	0	0	0	16
denovo2634	D_0__Bacteria; D_1__Tenericutes; D_2__Mollicutes; D_3__Mycoplasmatales; D_4__Mycoplasmataceae; D_5__Mycoplasma; D_6__uncultured bacterium	0	0	0	0	0	0	0	1	0	0	0	0	1	0	0	1	0	1	5	0	0	0	4	1	0	1	0	0	0	0	0	0	1	16
denovo5319	D_0__Bacteria; D_1__Tenericutes; D_2__Mollicutes; D_3__Mycoplasmatales; D_4__Mycoplasmataceae; D_5__Mycoplasma; D_6__uncultured bacterium	0	1	0	0	1	0	0	5	2	0	0	1	0	0	0	1	0	0	0	0	0	0	0	0	0	5	0	0	0	0	0	0	0	16
denovo1757	D_0__Bacteria; D_1__Tenericutes; D_2__Mollicutes; D_3__Mycoplasmatales; D_4__Mycoplasmataceae; D_5__Mycoplasma; D_6__uncultured bacterium	0	0	0	1	0	0	0	0	0	0	0	0	0	0	2	0	1	0	6	0	0	0	5	0	0	0	0	0	0	0	0	0	0	15
denovo841	D_0__Bacteria; D_1__Tenericutes; D_2__Mollicutes; D_3__Mycoplasmatales; D_4__Mycoplasmataceae; D_5__Mycoplasma; D_6__uncultured bacterium	0	0	0	0	0	0	0	0	0	1	0	0	1	0	0	0	0	0	5	1	0	0	0	1	3	0	0	0	0	1	0	0	2	15
denovo3308	Unassigned	0	0	0	0	0	0	1	0	0	0	0	0	0	0	0	0	0	0	0	0	0	2	5	1	4	0	0	0	0	0	0	0	2	15
denovo1720	D_0__Bacteria; D_1__Tenericutes; D_2__Mollicutes; D_3__Mycoplasmatales; D_4__Mycoplasmataceae; D_5__Mycoplasma; D_6__uncultured bacterium	0	0	0	0	0	0	0	0	0	0	0	0	0	0	1	0	0	0	1	0	0	0	0	0	0	0	0	0	0	0	1	0	11	14
denovo271	D_0__Bacteria; D_1__Tenericutes; D_2__Mollicutes; D_3__Mycoplasmatales; D_4__Mycoplasmataceae; D_5__Mycoplasma; D_6__uncultured bacterium	0	0	0	0	0	0	0	0	0	0	0	0	0	0	0	0	0	1	7	0	0	0	1	0	0	0	0	0	0	0	0	0	5	14
denovo38	Unassigned	0	0	0	0	0	0	0	0	0	0	0	0	0	0	0	0	0	0	0	0	7	0	0	0	0	0	0	0	0	0	0	6	0	13
denovo5301	D_0__Bacteria; D_1__Tenericutes; D_2__Mollicutes; D_3__Mycoplasmatales; D_4__Mycoplasmataceae; D_5__Mycoplasma; D_6__uncultured bacterium	0	0	0	0	0	0	0	2	0	0	0	0	0	0	0	2	0	0	0	0	3	0	0	0	0	5	0	0	0	0	0	0	0	12
denovo60	D_0__Bacteria; D_1__Tenericutes; D_2__Mollicutes; D_3__Mycoplasmatales; D_4__Mycoplasmataceae; D_5__Mycoplasma; D_6__uncultured bacterium	0	0	0	0	0	1	6	0	0	4	0	1	0	0	0	0	0	0	0	0	0	0	0	0	0	0	0	0	0	0	0	0	0	12
denovo745	D_0__Bacteria; D_1__Tenericutes; D_2__Mollicutes; D_3__Mycoplasmatales; D_4__Mycoplasmataceae; D_5__Mycoplasma; D_6__uncultured bacterium	0	0	1	0	0	0	0	0	0	1	0	0	0	0	0	0	0	2	3	0	0	0	1	0	2	1	0	0	0	1	0	0	0	12
denovo1603	D_0__Bacteria; D_1__Tenericutes; D_2__Mollicutes; D_3__Mycoplasmatales; D_4__Mycoplasmataceae; D_5__Mycoplasma; D_6__uncultured bacterium	0	0	0	0	0	0	0	0	0	0	0	0	0	0	0	0	0	0	10	0	0	0	0	0	0	0	0	0	0	0	0	0	1	11
denovo1953	Unassigned	0	0	0	0	0	0	0	1	0	0	0	0	0	0	0	0	0	0	3	0	0	1	3	1	1	0	0	0	0	0	0	0	1	11
denovo1259	D_0__Bacteria; D_1__Tenericutes; D_2__Mollicutes; D_3__Mycoplasmatales; D_4__Mycoplasmataceae; D_5__Mycoplasma; D_6__uncultured bacterium	0	0	0	0	0	0	0	0	0	0	0	0	0	0	0	0	0	0	0	0	0	0	0	0	0	0	0	6	0	4	0	0	0	10
denovo1729	D_0__Bacteria; D_1__Tenericutes; D_2__Mollicutes; D_3__Mycoplasmatales; D_4__Mycoplasmataceae; D_5__Mycoplasma; D_6__uncultured bacterium	0	0	0	0	0	1	1	0	0	3	1	1	2	0	0	0	1	0	0	0	0	0	0	0	0	0	0	0	0	0	0	0	0	10
denovo6626	D_0__Bacteria; D_1__Tenericutes; D_2__Mollicutes; D_3__Mycoplasmatales; D_4__Mycoplasmataceae; D_5__Mycoplasma; D_6__uncultured bacterium	0	1	4	0	0	0	0	0	0	0	0	0	0	0	0	0	0	0	0	0	0	0	0	0	0	0	0	0	0	0	0	5	0	10
denovo176	D_0__Bacteria; D_1__Tenericutes; D_2__Mollicutes; D_3__Mycoplasmatales; D_4__Mycoplasmataceae; D_5__Mycoplasma; D_6__uncultured bacterium	0	0	0	0	0	0	0	0	0	0	0	0	0	0	0	0	0	0	0	0	4	0	0	3	0	0	0	2	0	0	0	0	0	9
denovo2717	Unassigned	0	0	0	0	0	0	0	0	0	0	0	0	0	0	0	0	0	0	1	0	1	3	4	0	0	0	0	0	0	0	0	0	0	9
denovo5152	D_0__Bacteria; D_1__Fusobacteria; D_2__Fusobacteriia; D_3__Fusobacteriales; D_4__Fusobacteriaceae; D_5__Psychrilyobacter; D_6__uncultured bacterium	0	1	0	4	0	0	0	1	0	0	0	0	0	0	0	0	1	0	0	0	0	0	0	0	0	0	0	0	0	0	1	0	0	8
denovo1711	D_0__Bacteria; D_1__Tenericutes; D_2__Mollicutes; D_3__Mycoplasmatales; D_4__Mycoplasmataceae; D_5__Mycoplasma; D_6__uncultured bacterium	0	0	0	0	0	0	0	0	0	0	0	0	0	0	1	0	0	0	5	0	0	0	0	0	2	0	0	0	0	0	0	0	0	8
denovo208	D_0__Bacteria; D_1__Tenericutes; D_2__Mollicutes; D_3__Mycoplasmatales; D_4__Mycoplasmataceae; D_5__Mycoplasma; D_6__uncultured bacterium	0	0	0	0	0	0	0	0	0	0	0	0	0	0	0	0	0	0	0	0	8	0	0	0	0	0	0	0	0	0	0	0	0	8
denovo1460	Unassigned	0	0	0	0	0	0	0	0	0	0	0	0	1	0	0	0	0	0	3	0	1	1	1	0	1	0	0	0	0	0	0	0	0	8
denovo4473	Unassigned	0	0	0	0	0	0	0	0	0	0	0	0	0	0	0	0	0	0	0	0	7	0	0	0	0	0	0	0	0	0	0	0	0	7
denovo1508	D_0__Bacteria; D_1__Tenericutes; D_2__Mollicutes; D_3__Mycoplasmatales; D_4__Mycoplasmataceae; D_5__Mycoplasma; D_6__uncultured bacterium	0	0	1	1	0	0	0	0	0	0	0	0	0	0	0	0	1	1	1	0	0	0	0	0	0	1	0	0	0	0	0	0	0	6
denovo285	D_0__Bacteria; D_1__Tenericutes; D_2__Mollicutes; D_3__Mycoplasmatales; D_4__Mycoplasmataceae; D_5__Mycoplasma; D_6__uncultured bacterium	0	0	0	0	0	0	0	0	0	0	0	0	0	0	0	1	0	0	0	0	0	0	0	2	0	0	0	2	1	0	0	0	0	6
denovo84	D_0__Bacteria; D_1__Tenericutes; D_2__Mollicutes; D_3__Mycoplasmatales; D_4__Mycoplasmataceae; D_5__Mycoplasma; D_6__uncultured bacterium	0	0	0	0	0	0	0	0	0	0	0	0	0	0	2	0	0	2	2	0	0	0	0	0	0	0	0	0	0	0	0	0	0	6
denovo91	D_0__Bacteria; D_1__Tenericutes; D_2__Mollicutes; D_3__Mycoplasmatales; D_4__Mycoplasmataceae; D_5__Mycoplasma; D_6__uncultured bacterium	0	0	0	0	0	0	0	0	0	0	0	0	0	0	0	0	0	0	0	0	6	0	0	0	0	0	0	0	0	0	0	0	0	6
denovo920	D_0__Bacteria; D_1__Tenericutes; D_2__Mollicutes; D_3__Mycoplasmatales; D_4__Mycoplasmataceae; D_5__Mycoplasma; D_6__uncultured bacterium	0	0	0	0	0	0	0	0	0	0	0	0	0	0	0	0	0	0	0	0	0	0	0	0	0	0	0	6	0	0	0	0	0	6
denovo134	D_0__Bacteria; D_1__Tenericutes; D_2__Mollicutes; D_3__Mycoplasmatales; D_4__Mycoplasmataceae; D_5__Mycoplasma; D_6__uncultured bacterium	0	0	0	0	0	0	0	0	0	0	0	0	0	0	0	0	0	0	0	0	5	0	0	0	0	0	0	0	0	0	0	0	0	5
denovo1659	D_0__Bacteria; D_1__Tenericutes; D_2__Mollicutes; D_3__Mycoplasmatales; D_4__Mycoplasmataceae; D_5__Mycoplasma; D_6__uncultured bacterium	0	0	0	0	0	0	0	0	0	0	0	0	0	0	0	0	0	0	4	0	0	0	0	0	0	0	0	0	0	0	0	0	1	5
denovo268	D_0__Bacteria; D_1__Tenericutes; D_2__Mollicutes; D_3__Mycoplasmatales; D_4__Mycoplasmataceae; D_5__Mycoplasma; D_6__uncultured bacterium	0	0	0	0	0	0	0	0	0	0	0	0	0	0	1	0	0	0	0	0	0	0	0	0	0	0	0	0	0	4	0	0	0	5
denovo6698	D_0__Bacteria; D_1__Tenericutes; D_2__Mollicutes; D_3__Mycoplasmatales; D_4__Mycoplasmataceae; D_5__Mycoplasma; D_6__uncultured bacterium	0	2	0	0	0	0	0	0	0	0	0	0	0	0	0	0	0	0	0	0	3	0	0	0	0	0	0	0	0	0	0	0	0	5
denovo6808	D_0__Bacteria; D_1__Tenericutes; D_2__Mollicutes; D_3__Mycoplasmatales; D_4__Mycoplasmataceae; D_5__Mycoplasma; D_6__uncultured bacterium	0	0	2	0	0	0	0	0	0	0	0	0	0	0	0	0	0	0	0	0	3	0	0	0	0	0	0	0	0	0	0	0	0	5
denovo6048	Unassigned	0	0	3	0	0	0	0	0	0	0	0	2	0	0	0	0	0	0	0	0	0	0	0	0	0	0	0	0	0	0	0	0	0	5
denovo6722	D_0__Bacteria; D_1__Fusobacteria; D_2__Fusobacteriia; D_3__Fusobacteriales; D_4__Fusobacteriaceae; D_5__Psychrilyobacter; D_6__uncultured bacterium	0	1	1	0	0	0	0	0	0	0	0	0	0	0	0	0	0	0	0	0	2	0	0	0	0	0	0	0	0	0	0	0	0	4
denovo224	D_0__Bacteria; D_1__Tenericutes; D_2__Mollicutes; D_3__Mycoplasmatales; D_4__Mycoplasmataceae; D_5__Mycoplasma; D_6__uncultured bacterium	0	0	0	0	0	0	0	0	0	0	0	0	0	0	0	0	0	0	0	0	0	0	0	3	0	0	0	1	0	0	0	0	0	4
denovo4882	D_0__Bacteria; D_1__Tenericutes; D_2__Mollicutes; D_3__Mycoplasmatales; D_4__Mycoplasmataceae; D_5__Mycoplasma; D_6__uncultured bacterium	0	0	0	0	0	0	0	0	0	0	0	0	0	0	0	0	2	0	0	0	0	0	0	0	0	0	2	0	0	0	0	0	0	4
denovo5889	D_0__Bacteria; D_1__Tenericutes; D_2__Mollicutes; D_3__Mycoplasmatales; D_4__Mycoplasmataceae; D_5__Mycoplasma; D_6__uncultured bacterium	0	0	0	0	0	0	0	0	0	0	0	3	0	0	0	0	0	0	0	0	1	0	0	0	0	0	0	0	0	0	0	0	0	4
denovo1038	Unassigned	0	0	0	2	0	0	0	0	0	0	0	0	0	0	0	0	0	0	0	0	0	0	0	0	1	0	0	0	0	1	0	0	0	4
denovo2666	D_0__Bacteria; D_1__Tenericutes; D_2__Mollicutes; D_3__Mycoplasmatales; D_4__Mycoplasmataceae; D_5__Mycoplasma; D_6__uncultured bacterium	0	0	0	0	0	0	0	0	0	0	0	0	0	0	0	0	1	0	0	0	0	0	0	0	0	0	2	0	0	0	0	0	0	3
denovo7434	D_0__Bacteria; D_1__Tenericutes; D_2__Mollicutes; D_3__Mycoplasmatales; D_4__Mycoplasmataceae; D_5__Mycoplasma; D_6__uncultured bacterium	0	2	0	0	0	0	0	0	0	0	1	0	0	0	0	0	0	0	0	0	0	0	0	0	0	0	0	0	0	0	0	0	0	3
denovo6734	Unassigned	0	0	3	0	0	0	0	0	0	0	0	0	0	0	0	0	0	0	0	0	0	0	0	0	0	0	0	0	0	0	0	0	0	3
denovo189	D_0__Bacteria; D_1__Tenericutes; D_2__Mollicutes; D_3__Mycoplasmatales; D_4__Mycoplasmataceae; D_5__Mycoplasma; D_6__uncultured bacterium	0	0	0	0	0	0	0	0	0	0	0	0	0	0	0	0	0	0	0	0	2	0	0	0	0	0	0	0	0	0	0	0	0	2
denovo5223	D_0__Bacteria; D_1__Tenericutes; D_2__Mollicutes; D_3__Mycoplasmatales; D_4__Mycoplasmataceae; D_5__Mycoplasma; D_6__uncultured bacterium	0	0	0	0	0	0	0	0	1	0	0	0	0	0	0	1	0	0	0	0	0	0	0	0	0	0	0	0	0	0	0	0	0	2
denovo6098	D_0__Bacteria; D_1__Tenericutes; D_2__Mollicutes; D_3__Mycoplasmatales; D_4__Mycoplasmataceae; D_5__Mycoplasma; D_6__uncultured bacterium	0	1	1	0	0	0	0	0	0	0	0	0	0	0	0	0	0	0	0	0	0	0	0	0	0	0	0	0	0	0	0	0	0	2
denovo6681	D_0__Bacteria; D_1__Tenericutes; D_2__Mollicutes; D_3__Mycoplasmatales; D_4__Mycoplasmataceae; D_5__Mycoplasma; D_6__uncultured bacterium	0	1	0	0	0	0	0	0	0	0	0	0	0	0	0	0	0	0	0	0	1	0	0	0	0	0	0	0	0	0	0	0	0	2
denovo6540	Unassigned	0	0	1	0	0	0	0	0	0	0	0	0	0	0	0	0	0	0	0	0	1	0	0	0	0	0	0	0	0	0	0	0	0	2
denovo169	D_0__Bacteria; D_1__Tenericutes; D_2__Mollicutes; D_3__Mycoplasmatales; D_4__Mycoplasmataceae; D_5__Mycoplasma; D_6__uncultured bacterium	0	0	0	0	0	0	0	0	0	0	0	0	0	0	0	1	0	0	0	0	0	0	0	0	0	0	0	0	0	0	0	0	0	1
denovo178	D_0__Bacteria; D_1__Tenericutes; D_2__Mollicutes; D_3__Mycoplasmatales; D_4__Mycoplasmataceae; D_5__Mycoplasma; D_6__uncultured bacterium	0	0	0	0	0	0	0	0	0	0	0	0	0	0	0	1	0	0	0	0	0	0	0	0	0	0	0	0	0	0	0	0	0	1
denovo1816	D_0__Bacteria; D_1__Tenericutes; D_2__Mollicutes; D_3__Mycoplasmatales; D_4__Mycoplasmataceae; D_5__Mycoplasma; D_6__uncultured bacterium	0	0	0	0	0	0	0	0	0	0	0	0	0	0	0	0	0	0	0	0	1	0	0	0	0	0	0	0	0	0	0	0	0	1
denovo1832	D_0__Bacteria; D_1__Tenericutes; D_2__Mollicutes; D_3__Mycoplasmatales; D_4__Mycoplasmataceae; D_5__Mycoplasma; D_6__uncultured bacterium	0	0	0	0	0	0	0	0	0	0	0	0	0	0	0	0	0	0	0	0	1	0	0	0	0	0	0	0	0	0	0	0	0	1
denovo193	D_0__Bacteria; D_1__Tenericutes; D_2__Mollicutes; D_3__Mycoplasmatales; D_4__Mycoplasmataceae; D_5__Mycoplasma; D_6__uncultured bacterium	0	0	0	0	0	0	0	0	0	0	0	0	0	0	0	0	0	0	0	0	0	0	0	1	0	0	0	0	0	0	0	0	0	1
denovo3347	D_0__Bacteria; D_1__Tenericutes; D_2__Mollicutes; D_3__Mycoplasmatales; D_4__Mycoplasmataceae; D_5__Mycoplasma; D_6__uncultured bacterium	0	0	0	0	0	0	0	0	0	0	0	0	0	0	0	0	0	0	0	0	0	0	0	0	1	0	0	0	0	0	0	0	0	1
denovo4609	D_0__Bacteria; D_1__Tenericutes; D_2__Mollicutes; D_3__Mycoplasmatales; D_4__Mycoplasmataceae; D_5__Mycoplasma; D_6__uncultured bacterium	0	0	0	0	0	0	0	0	0	0	0	0	0	0	0	0	0	0	0	0	1	0	0	0	0	0	0	0	0	0	0	0	0	1
denovo681	D_0__Bacteria; D_1__Tenericutes; D_2__Mollicutes; D_3__Mycoplasmatales; D_4__Mycoplasmataceae; D_5__Mycoplasma; D_6__uncultured bacterium	0	0	0	0	0	0	0	0	0	0	0	0	0	0	0	0	0	0	1	0	0	0	0	0	0	0	0	0	0	0	0	0	0	1
denovo6985	D_0__Bacteria; D_1__Tenericutes; D_2__Mollicutes; D_3__Mycoplasmatales; D_4__Mycoplasmataceae; D_5__Mycoplasma; D_6__uncultured bacterium	0	0	0	0	0	0	0	0	0	0	0	0	0	0	0	0	0	0	0	0	1	0	0	0	0	0	0	0	0	0	0	0	0	1
denovo6989	D_0__Bacteria; D_1__Tenericutes; D_2__Mollicutes; D_3__Mycoplasmatales; D_4__Mycoplasmataceae; D_5__Mycoplasma; D_6__uncultured bacterium	0	0	0	0	0	0	0	0	0	0	0	0	0	0	0	0	0	0	0	0	1	0	0	0	0	0	0	0	0	0	0	0	0	1
denovo7011	D_0__Bacteria; D_1__Tenericutes; D_2__Mollicutes; D_3__Mycoplasmatales; D_4__Mycoplasmataceae; D_5__Mycoplasma; D_6__uncultured bacterium	0	0	0	0	0	0	0	0	0	0	0	0	0	0	0	0	0	0	0	0	1	0	0	0	0	0	0	0	0	0	0	0	0	1
denovo1017	Unassigned	0	0	0	0	0	0	0	0	0	0	0	0	0	0	0	0	0	0	0	0	1	0	0	0	0	0	0	0	0	0	0	0	0	1
denovo1112	Unassigned	0	0	0	0	0	0	0	0	0	0	0	0	0	0	0	0	0	0	0	0	1	0	0	0	0	0	0	0	0	0	0	0	0	1
denovo2675	Unassigned	0	0	0	0	0	0	0	0	0	0	0	0	0	0	0	0	0	0	0	0	1	0	0	0	0	0	0	0	0	0	0	0	0	1
denovo6616	Unassigned	0	0	1	0	0	0	0	0	0	0	0	0	0	0	0	0	0	0	0	0	0	0	0	0	0	0	0	0	0	0	0	0	0	1
denovo6971	Unassigned	0	0	0	0	0	0	0	0	0	0	0	0	0	0	0	0	0	0	0	0	1	0	0	0	0	0	0	0	0	0	0	0	0	1
denovo87	D_0__Bacteria; D_1__Proteobacteria; D_2__Epsilonproteobacteria; D_3__Campylobacterales; D_4__Helicobacteraceae; D_5__uncultured; D_6__uncultured bacterium	0	0	0	0	0	0	0	0	0	0	0	0	0	0	0	0	0	0	0	0	0	0	0	0	0	0	0	0	0	0	0	0	0	0
denovo1160	D_0__Bacteria; D_1__Tenericutes; D_2__Mollicutes; D_3__Mycoplasmatales; D_4__Mycoplasmataceae; D_5__Mycoplasma; D_6__uncultured bacterium	0	0	0	0	0	0	0	0	0	0	0	0	0	0	0	0	0	0	0	0	0	0	0	0	0	0	0	0	0	0	0	0	0	0
denovo1500	D_0__Bacteria; D_1__Tenericutes; D_2__Mollicutes; D_3__Mycoplasmatales; D_4__Mycoplasmataceae; D_5__Mycoplasma; D_6__uncultured bacterium	0	0	0	0	0	0	0	0	0	0	0	0	0	0	0	0	0	0	0	0	0	0	0	0	0	0	0	0	0	0	0	0	0	0
denovo1526	D_0__Bacteria; D_1__Tenericutes; D_2__Mollicutes; D_3__Mycoplasmatales; D_4__Mycoplasmataceae; D_5__Mycoplasma; D_6__uncultured bacterium	0	0	0	0	0	0	0	0	0	0	0	0	0	0	0	0	0	0	0	0	0	0	0	0	0	0	0	0	0	0	0	0	0	0
denovo1541	D_0__Bacteria; D_1__Tenericutes; D_2__Mollicutes; D_3__Mycoplasmatales; D_4__Mycoplasmataceae; D_5__Mycoplasma; D_6__uncultured bacterium	0	0	0	0	0	0	0	0	0	0	0	0	0	0	0	0	0	0	0	0	0	0	0	0	0	0	0	0	0	0	0	0	0	0
denovo1581	D_0__Bacteria; D_1__Tenericutes; D_2__Mollicutes; D_3__Mycoplasmatales; D_4__Mycoplasmataceae; D_5__Mycoplasma; D_6__uncultured bacterium	0	0	0	0	0	0	0	0	0	0	0	0	0	0	0	0	0	0	0	0	0	0	0	0	0	0	0	0	0	0	0	0	0	0
denovo1582	D_0__Bacteria; D_1__Tenericutes; D_2__Mollicutes; D_3__Mycoplasmatales; D_4__Mycoplasmataceae; D_5__Mycoplasma; D_6__uncultured bacterium	0	0	0	0	0	0	0	0	0	0	0	0	0	0	0	0	0	0	0	0	0	0	0	0	0	0	0	0	0	0	0	0	0	0
denovo1606	D_0__Bacteria; D_1__Tenericutes; D_2__Mollicutes; D_3__Mycoplasmatales; D_4__Mycoplasmataceae; D_5__Mycoplasma; D_6__uncultured bacterium	0	0	0	0	0	0	0	0	0	0	0	0	0	0	0	0	0	0	0	0	0	0	0	0	0	0	0	0	0	0	0	0	0	0
denovo1629	D_0__Bacteria; D_1__Tenericutes; D_2__Mollicutes; D_3__Mycoplasmatales; D_4__Mycoplasmataceae; D_5__Mycoplasma; D_6__uncultured bacterium	0	0	0	0	0	0	0	0	0	0	0	0	0	0	0	0	0	0	0	0	0	0	0	0	0	0	0	0	0	0	0	0	0	0
denovo1635	D_0__Bacteria; D_1__Tenericutes; D_2__Mollicutes; D_3__Mycoplasmatales; D_4__Mycoplasmataceae; D_5__Mycoplasma; D_6__uncultured bacterium	0	0	0	0	0	0	0	0	0	0	0	0	0	0	0	0	0	0	0	0	0	0	0	0	0	0	0	0	0	0	0	0	0	0
denovo1636	D_0__Bacteria; D_1__Tenericutes; D_2__Mollicutes; D_3__Mycoplasmatales; D_4__Mycoplasmataceae; D_5__Mycoplasma; D_6__uncultured bacterium	0	0	0	0	0	0	0	0	0	0	0	0	0	0	0	0	0	0	0	0	0	0	0	0	0	0	0	0	0	0	0	0	0	0
denovo1638	D_0__Bacteria; D_1__Tenericutes; D_2__Mollicutes; D_3__Mycoplasmatales; D_4__Mycoplasmataceae; D_5__Mycoplasma; D_6__uncultured bacterium	0	0	0	0	0	0	0	0	0	0	0	0	0	0	0	0	0	0	0	0	0	0	0	0	0	0	0	0	0	0	0	0	0	0
denovo1639	D_0__Bacteria; D_1__Tenericutes; D_2__Mollicutes; D_3__Mycoplasmatales; D_4__Mycoplasmataceae; D_5__Mycoplasma; D_6__uncultured bacterium	0	0	0	0	0	0	0	0	0	0	0	0	0	0	0	0	0	0	0	0	0	0	0	0	0	0	0	0	0	0	0	0	0	0
denovo1640	D_0__Bacteria; D_1__Tenericutes; D_2__Mollicutes; D_3__Mycoplasmatales; D_4__Mycoplasmataceae; D_5__Mycoplasma; D_6__uncultured bacterium	0	0	0	0	0	0	0	0	0	0	0	0	0	0	0	0	0	0	0	0	0	0	0	0	0	0	0	0	0	0	0	0	0	0
denovo1678	D_0__Bacteria; D_1__Tenericutes; D_2__Mollicutes; D_3__Mycoplasmatales; D_4__Mycoplasmataceae; D_5__Mycoplasma; D_6__uncultured bacterium	0	0	0	0	0	0	0	0	0	0	0	0	0	0	0	0	0	0	0	0	0	0	0	0	0	0	0	0	0	0	0	0	0	0
denovo1697	D_0__Bacteria; D_1__Tenericutes; D_2__Mollicutes; D_3__Mycoplasmatales; D_4__Mycoplasmataceae; D_5__Mycoplasma; D_6__uncultured bacterium	0	0	0	0	0	0	0	0	0	0	0	0	0	0	0	0	0	0	0	0	0	0	0	0	0	0	0	0	0	0	0	0	0	0
denovo1759	D_0__Bacteria; D_1__Tenericutes; D_2__Mollicutes; D_3__Mycoplasmatales; D_4__Mycoplasmataceae; D_5__Mycoplasma; D_6__uncultured bacterium	0	0	0	0	0	0	0	0	0	0	0	0	0	0	0	0	0	0	0	0	0	0	0	0	0	0	0	0	0	0	0	0	0	0
denovo1773	D_0__Bacteria; D_1__Tenericutes; D_2__Mollicutes; D_3__Mycoplasmatales; D_4__Mycoplasmataceae; D_5__Mycoplasma; D_6__uncultured bacterium	0	0	0	0	0	0	0	0	0	0	0	0	0	0	0	0	0	0	0	0	0	0	0	0	0	0	0	0	0	0	0	0	0	0
denovo1823	D_0__Bacteria; D_1__Tenericutes; D_2__Mollicutes; D_3__Mycoplasmatales; D_4__Mycoplasmataceae; D_5__Mycoplasma; D_6__uncultured bacterium	0	0	0	0	0	0	0	0	0	0	0	0	0	0	0	0	0	0	0	0	0	0	0	0	0	0	0	0	0	0	0	0	0	0
denovo1825	D_0__Bacteria; D_1__Tenericutes; D_2__Mollicutes; D_3__Mycoplasmatales; D_4__Mycoplasmataceae; D_5__Mycoplasma; D_6__uncultured bacterium	0	0	0	0	0	0	0	0	0	0	0	0	0	0	0	0	0	0	0	0	0	0	0	0	0	0	0	0	0	0	0	0	0	0
denovo1843	D_0__Bacteria; D_1__Tenericutes; D_2__Mollicutes; D_3__Mycoplasmatales; D_4__Mycoplasmataceae; D_5__Mycoplasma; D_6__uncultured bacterium	0	0	0	0	0	0	0	0	0	0	0	0	0	0	0	0	0	0	0	0	0	0	0	0	0	0	0	0	0	0	0	0	0	0
denovo185	D_0__Bacteria; D_1__Tenericutes; D_2__Mollicutes; D_3__Mycoplasmatales; D_4__Mycoplasmataceae; D_5__Mycoplasma; D_6__uncultured bacterium	0	0	0	0	0	0	0	0	0	0	0	0	0	0	0	0	0	0	0	0	0	0	0	0	0	0	0	0	0	0	0	0	0	0
denovo1876	D_0__Bacteria; D_1__Tenericutes; D_2__Mollicutes; D_3__Mycoplasmatales; D_4__Mycoplasmataceae; D_5__Mycoplasma; D_6__uncultured bacterium	0	0	0	0	0	0	0	0	0	0	0	0	0	0	0	0	0	0	0	0	0	0	0	0	0	0	0	0	0	0	0	0	0	0
denovo191	D_0__Bacteria; D_1__Tenericutes; D_2__Mollicutes; D_3__Mycoplasmatales; D_4__Mycoplasmataceae; D_5__Mycoplasma; D_6__uncultured bacterium	0	0	0	0	0	0	0	0	0	0	0	0	0	0	0	0	0	0	0	0	0	0	0	0	0	0	0	0	0	0	0	0	0	0
denovo283	D_0__Bacteria; D_1__Tenericutes; D_2__Mollicutes; D_3__Mycoplasmatales; D_4__Mycoplasmataceae; D_5__Mycoplasma; D_6__uncultured bacterium	0	0	0	0	0	0	0	0	0	0	0	0	0	0	0	0	0	0	0	0	0	0	0	0	0	0	0	0	0	0	0	0	0	0
denovo301	D_0__Bacteria; D_1__Tenericutes; D_2__Mollicutes; D_3__Mycoplasmatales; D_4__Mycoplasmataceae; D_5__Mycoplasma; D_6__uncultured bacterium	0	0	0	0	0	0	0	0	0	0	0	0	0	0	0	0	0	0	0	0	0	0	0	0	0	0	0	0	0	0	0	0	0	0
denovo3019	D_0__Bacteria; D_1__Tenericutes; D_2__Mollicutes; D_3__Mycoplasmatales; D_4__Mycoplasmataceae; D_5__Mycoplasma; D_6__uncultured bacterium	0	0	0	0	0	0	0	0	0	0	0	0	0	0	0	0	0	0	0	0	0	0	0	0	0	0	0	0	0	0	0	0	0	0
denovo35	D_0__Bacteria; D_1__Tenericutes; D_2__Mollicutes; D_3__Mycoplasmatales; D_4__Mycoplasmataceae; D_5__Mycoplasma; D_6__uncultured bacterium	0	0	0	0	0	0	0	0	0	0	0	0	0	0	0	0	0	0	0	0	0	0	0	0	0	0	0	0	0	0	0	0	0	0
denovo4244	D_0__Bacteria; D_1__Tenericutes; D_2__Mollicutes; D_3__Mycoplasmatales; D_4__Mycoplasmataceae; D_5__Mycoplasma; D_6__uncultured bacterium	0	0	0	0	0	0	0	0	0	0	0	0	0	0	0	0	0	0	0	0	0	0	0	0	0	0	0	0	0	0	0	0	0	0
denovo4450	D_0__Bacteria; D_1__Tenericutes; D_2__Mollicutes; D_3__Mycoplasmatales; D_4__Mycoplasmataceae; D_5__Mycoplasma; D_6__uncultured bacterium	0	0	0	0	0	0	0	0	0	0	0	0	0	0	0	0	0	0	0	0	0	0	0	0	0	0	0	0	0	0	0	0	0	0
denovo4589	D_0__Bacteria; D_1__Tenericutes; D_2__Mollicutes; D_3__Mycoplasmatales; D_4__Mycoplasmataceae; D_5__Mycoplasma; D_6__uncultured bacterium	0	0	0	0	0	0	0	0	0	0	0	0	0	0	0	0	0	0	0	0	0	0	0	0	0	0	0	0	0	0	0	0	0	0
denovo4590	D_0__Bacteria; D_1__Tenericutes; D_2__Mollicutes; D_3__Mycoplasmatales; D_4__Mycoplasmataceae; D_5__Mycoplasma; D_6__uncultured bacterium	0	0	0	0	0	0	0	0	0	0	0	0	0	0	0	0	0	0	0	0	0	0	0	0	0	0	0	0	0	0	0	0	0	0
denovo4616	D_0__Bacteria; D_1__Tenericutes; D_2__Mollicutes; D_3__Mycoplasmatales; D_4__Mycoplasmataceae; D_5__Mycoplasma; D_6__uncultured bacterium	0	0	0	0	0	0	0	0	0	0	0	0	0	0	0	0	0	0	0	0	0	0	0	0	0	0	0	0	0	0	0	0	0	0
denovo4619	D_0__Bacteria; D_1__Tenericutes; D_2__Mollicutes; D_3__Mycoplasmatales; D_4__Mycoplasmataceae; D_5__Mycoplasma; D_6__uncultured bacterium	0	0	0	0	0	0	0	0	0	0	0	0	0	0	0	0	0	0	0	0	0	0	0	0	0	0	0	0	0	0	0	0	0	0
denovo5332	D_0__Bacteria; D_1__Tenericutes; D_2__Mollicutes; D_3__Mycoplasmatales; D_4__Mycoplasmataceae; D_5__Mycoplasma; D_6__uncultured bacterium	0	0	0	0	0	0	0	0	0	0	0	0	0	0	0	0	0	0	0	0	0	0	0	0	0	0	0	0	0	0	0	0	0	0
denovo5674	D_0__Bacteria; D_1__Tenericutes; D_2__Mollicutes; D_3__Mycoplasmatales; D_4__Mycoplasmataceae; D_5__Mycoplasma; D_6__uncultured bacterium	0	0	0	0	0	0	0	0	0	0	0	0	0	0	0	0	0	0	0	0	0	0	0	0	0	0	0	0	0	0	0	0	0	0
denovo5871	D_0__Bacteria; D_1__Tenericutes; D_2__Mollicutes; D_3__Mycoplasmatales; D_4__Mycoplasmataceae; D_5__Mycoplasma; D_6__uncultured bacterium	0	0	0	0	0	0	0	0	0	0	0	0	0	0	0	0	0	0	0	0	0	0	0	0	0	0	0	0	0	0	0	0	0	0
denovo6437	D_0__Bacteria; D_1__Tenericutes; D_2__Mollicutes; D_3__Mycoplasmatales; D_4__Mycoplasmataceae; D_5__Mycoplasma; D_6__uncultured bacterium	0	0	0	0	0	0	0	0	0	0	0	0	0	0	0	0	0	0	0	0	0	0	0	0	0	0	0	0	0	0	0	0	0	0
denovo6503	D_0__Bacteria; D_1__Tenericutes; D_2__Mollicutes; D_3__Mycoplasmatales; D_4__Mycoplasmataceae; D_5__Mycoplasma; D_6__uncultured bacterium	0	0	0	0	0	0	0	0	0	0	0	0	0	0	0	0	0	0	0	0	0	0	0	0	0	0	0	0	0	0	0	0	0	0
denovo6514	D_0__Bacteria; D_1__Tenericutes; D_2__Mollicutes; D_3__Mycoplasmatales; D_4__Mycoplasmataceae; D_5__Mycoplasma; D_6__uncultured bacterium	0	0	0	0	0	0	0	0	0	0	0	0	0	0	0	0	0	0	0	0	0	0	0	0	0	0	0	0	0	0	0	0	0	0
denovo6548	D_0__Bacteria; D_1__Tenericutes; D_2__Mollicutes; D_3__Mycoplasmatales; D_4__Mycoplasmataceae; D_5__Mycoplasma; D_6__uncultured bacterium	0	0	0	0	0	0	0	0	0	0	0	0	0	0	0	0	0	0	0	0	0	0	0	0	0	0	0	0	0	0	0	0	0	0
denovo6560	D_0__Bacteria; D_1__Tenericutes; D_2__Mollicutes; D_3__Mycoplasmatales; D_4__Mycoplasmataceae; D_5__Mycoplasma; D_6__uncultured bacterium	0	0	0	0	0	0	0	0	0	0	0	0	0	0	0	0	0	0	0	0	0	0	0	0	0	0	0	0	0	0	0	0	0	0
denovo6563	D_0__Bacteria; D_1__Tenericutes; D_2__Mollicutes; D_3__Mycoplasmatales; D_4__Mycoplasmataceae; D_5__Mycoplasma; D_6__uncultured bacterium	0	0	0	0	0	0	0	0	0	0	0	0	0	0	0	0	0	0	0	0	0	0	0	0	0	0	0	0	0	0	0	0	0	0
denovo6583	D_0__Bacteria; D_1__Tenericutes; D_2__Mollicutes; D_3__Mycoplasmatales; D_4__Mycoplasmataceae; D_5__Mycoplasma; D_6__uncultured bacterium	0	0	0	0	0	0	0	0	0	0	0	0	0	0	0	0	0	0	0	0	0	0	0	0	0	0	0	0	0	0	0	0	0	0
denovo6595	D_0__Bacteria; D_1__Tenericutes; D_2__Mollicutes; D_3__Mycoplasmatales; D_4__Mycoplasmataceae; D_5__Mycoplasma; D_6__uncultured bacterium	0	0	0	0	0	0	0	0	0	0	0	0	0	0	0	0	0	0	0	0	0	0	0	0	0	0	0	0	0	0	0	0	0	0
denovo6607	D_0__Bacteria; D_1__Tenericutes; D_2__Mollicutes; D_3__Mycoplasmatales; D_4__Mycoplasmataceae; D_5__Mycoplasma; D_6__uncultured bacterium	0	0	0	0	0	0	0	0	0	0	0	0	0	0	0	0	0	0	0	0	0	0	0	0	0	0	0	0	0	0	0	0	0	0
denovo6609	D_0__Bacteria; D_1__Tenericutes; D_2__Mollicutes; D_3__Mycoplasmatales; D_4__Mycoplasmataceae; D_5__Mycoplasma; D_6__uncultured bacterium	0	0	0	0	0	0	0	0	0	0	0	0	0	0	0	0	0	0	0	0	0	0	0	0	0	0	0	0	0	0	0	0	0	0
denovo6619	D_0__Bacteria; D_1__Tenericutes; D_2__Mollicutes; D_3__Mycoplasmatales; D_4__Mycoplasmataceae; D_5__Mycoplasma; D_6__uncultured bacterium	0	0	0	0	0	0	0	0	0	0	0	0	0	0	0	0	0	0	0	0	0	0	0	0	0	0	0	0	0	0	0	0	0	0
denovo6620	D_0__Bacteria; D_1__Tenericutes; D_2__Mollicutes; D_3__Mycoplasmatales; D_4__Mycoplasmataceae; D_5__Mycoplasma; D_6__uncultured bacterium	0	0	0	0	0	0	0	0	0	0	0	0	0	0	0	0	0	0	0	0	0	0	0	0	0	0	0	0	0	0	0	0	0	0
denovo6623	D_0__Bacteria; D_1__Tenericutes; D_2__Mollicutes; D_3__Mycoplasmatales; D_4__Mycoplasmataceae; D_5__Mycoplasma; D_6__uncultured bacterium	0	0	0	0	0	0	0	0	0	0	0	0	0	0	0	0	0	0	0	0	0	0	0	0	0	0	0	0	0	0	0	0	0	0
denovo6700	D_0__Bacteria; D_1__Tenericutes; D_2__Mollicutes; D_3__Mycoplasmatales; D_4__Mycoplasmataceae; D_5__Mycoplasma; D_6__uncultured bacterium	0	0	0	0	0	0	0	0	0	0	0	0	0	0	0	0	0	0	0	0	0	0	0	0	0	0	0	0	0	0	0	0	0	0
denovo6760	D_0__Bacteria; D_1__Tenericutes; D_2__Mollicutes; D_3__Mycoplasmatales; D_4__Mycoplasmataceae; D_5__Mycoplasma; D_6__uncultured bacterium	0	0	0	0	0	0	0	0	0	0	0	0	0	0	0	0	0	0	0	0	0	0	0	0	0	0	0	0	0	0	0	0	0	0
denovo6764	D_0__Bacteria; D_1__Tenericutes; D_2__Mollicutes; D_3__Mycoplasmatales; D_4__Mycoplasmataceae; D_5__Mycoplasma; D_6__uncultured bacterium	0	0	0	0	0	0	0	0	0	0	0	0	0	0	0	0	0	0	0	0	0	0	0	0	0	0	0	0	0	0	0	0	0	0
denovo6790	D_0__Bacteria; D_1__Tenericutes; D_2__Mollicutes; D_3__Mycoplasmatales; D_4__Mycoplasmataceae; D_5__Mycoplasma; D_6__uncultured bacterium	0	0	0	0	0	0	0	0	0	0	0	0	0	0	0	0	0	0	0	0	0	0	0	0	0	0	0	0	0	0	0	0	0	0
denovo6797	D_0__Bacteria; D_1__Tenericutes; D_2__Mollicutes; D_3__Mycoplasmatales; D_4__Mycoplasmataceae; D_5__Mycoplasma; D_6__uncultured bacterium	0	0	0	0	0	0	0	0	0	0	0	0	0	0	0	0	0	0	0	0	0	0	0	0	0	0	0	0	0	0	0	0	0	0
denovo6881	D_0__Bacteria; D_1__Tenericutes; D_2__Mollicutes; D_3__Mycoplasmatales; D_4__Mycoplasmataceae; D_5__Mycoplasma; D_6__uncultured bacterium	0	0	0	0	0	0	0	0	0	0	0	0	0	0	0	0	0	0	0	0	0	0	0	0	0	0	0	0	0	0	0	0	0	0
denovo6937	D_0__Bacteria; D_1__Tenericutes; D_2__Mollicutes; D_3__Mycoplasmatales; D_4__Mycoplasmataceae; D_5__Mycoplasma; D_6__uncultured bacterium	0	0	0	0	0	0	0	0	0	0	0	0	0	0	0	0	0	0	0	0	0	0	0	0	0	0	0	0	0	0	0	0	0	0
denovo6962	D_0__Bacteria; D_1__Tenericutes; D_2__Mollicutes; D_3__Mycoplasmatales; D_4__Mycoplasmataceae; D_5__Mycoplasma; D_6__uncultured bacterium	0	0	0	0	0	0	0	0	0	0	0	0	0	0	0	0	0	0	0	0	0	0	0	0	0	0	0	0	0	0	0	0	0	0
denovo7032	D_0__Bacteria; D_1__Tenericutes; D_2__Mollicutes; D_3__Mycoplasmatales; D_4__Mycoplasmataceae; D_5__Mycoplasma; D_6__uncultured bacterium	0	0	0	0	0	0	0	0	0	0	0	0	0	0	0	0	0	0	0	0	0	0	0	0	0	0	0	0	0	0	0	0	0	0
denovo710	D_0__Bacteria; D_1__Tenericutes; D_2__Mollicutes; D_3__Mycoplasmatales; D_4__Mycoplasmataceae; D_5__Mycoplasma; D_6__uncultured bacterium	0	0	0	0	0	0	0	0	0	0	0	0	0	0	0	0	0	0	0	0	0	0	0	0	0	0	0	0	0	0	0	0	0	0
denovo7210	D_0__Bacteria; D_1__Tenericutes; D_2__Mollicutes; D_3__Mycoplasmatales; D_4__Mycoplasmataceae; D_5__Mycoplasma; D_6__uncultured bacterium	0	0	0	0	0	0	0	0	0	0	0	0	0	0	0	0	0	0	0	0	0	0	0	0	0	0	0	0	0	0	0	0	0	0
denovo7406	D_0__Bacteria; D_1__Tenericutes; D_2__Mollicutes; D_3__Mycoplasmatales; D_4__Mycoplasmataceae; D_5__Mycoplasma; D_6__uncultured bacterium	0	0	0	0	0	0	0	0	0	0	0	0	0	0	0	0	0	0	0	0	0	0	0	0	0	0	0	0	0	0	0	0	0	0
denovo79	D_0__Bacteria; D_1__Tenericutes; D_2__Mollicutes; D_3__Mycoplasmatales; D_4__Mycoplasmataceae; D_5__Mycoplasma; D_6__uncultured bacterium	0	0	0	0	0	0	0	0	0	0	0	0	0	0	0	0	0	0	0	0	0	0	0	0	0	0	0	0	0	0	0	0	0	0
denovo92	D_0__Bacteria; D_1__Tenericutes; D_2__Mollicutes; D_3__Mycoplasmatales; D_4__Mycoplasmataceae; D_5__Mycoplasma; D_6__uncultured bacterium	0	0	0	0	0	0	0	0	0	0	0	0	0	0	0	0	0	0	0	0	0	0	0	0	0	0	0	0	0	0	0	0	0	0
denovo1026	Unassigned	0	0	0	0	0	0	0	0	0	0	0	0	0	0	0	0	0	0	0	0	0	0	0	0	0	0	0	0	0	0	0	0	0	0
denovo1147	Unassigned	0	0	0	0	0	0	0	0	0	0	0	0	0	0	0	0	0	0	0	0	0	0	0	0	0	0	0	0	0	0	0	0	0	0
denovo1568	Unassigned	0	0	0	0	0	0	0	0	0	0	0	0	0	0	0	0	0	0	0	0	0	0	0	0	0	0	0	0	0	0	0	0	0	0
denovo183	Unassigned	0	0	0	0	0	0	0	0	0	0	0	0	0	0	0	0	0	0	0	0	0	0	0	0	0	0	0	0	0	0	0	0	0	0

## Sheet: HF
OTU ID	Taxonomy	HF.0004	HF.0009	HF.0020	HF.0020.2	HF.0021	HF.0022	HF.0022.2	HF.0023	HF.0024	HF.0028	HF.0029	HF.0030	HF.0030.2	HF.0032	HF.0037	HF.0038	HF.0073	HF.0080	HF.0083	HF.0086	HF.0087	HF.0088	HF.0097	HF.0105	HF.0142	HF.0179	HF.0189	HF.0194	HF.0196	HF.0196.2	HF.0197	Suma
denovo0	D_0__Bacteria; D_1__Tenericutes; D_2__Mollicutes; D_3__Mycoplasmatales; D_4__Mycoplasmataceae; D_5__Mycoplasma; D_6__uncultured bacterium	140	1298	370	1660	579	518	1831	3850	3089	1446	415	104	341	154	2948	1824	1609	151	111	131	146	13	1660	2088	103	2552	3062	53	314	528	1996	35084
denovo1	Unassigned	165	735	19	30	1807	1	0	1173	268	782	0	1	1	15	13	668	203	1	333	174	74	112	1	358	55	547	1227	89	91	95	29	9067
denovo9	D_0__Bacteria; D_1__Tenericutes; D_2__Mollicutes; D_3__Mycoplasmatales; D_4__Mycoplasmataceae; D_5__Mycoplasma; D_6__uncultured bacterium	7400	0	0	0	174	0	0	2	0	1	120	0	0	0	0	1	0	0	0	58	0	0	0	109	236	1	21	0	0	0	0	8123
denovo8	Unassigned	0	727	0	2	0	1	1	19	1	131	15	800	936	835	9	1	0	0	0	0	0	0	0	0	2	0	0	0	0	0	0	3480
denovo2	D_0__Bacteria; D_1__Tenericutes; D_2__Mollicutes; D_3__Mycoplasmatales; D_4__Mycoplasmataceae; D_5__Mycoplasma; D_6__uncultured bacterium	0	916	0	0	0	0	0	0	0	0	3	0	0	21	0	0	22	148	9	0	0	16	0	0	0	0	0	1485	0	0	0	2620
denovo11	D_0__Bacteria; D_1__Tenericutes; D_2__Mollicutes; D_3__Mycoplasmatales; D_4__Mycoplasmataceae; D_5__Mycoplasma; D_6__uncultured bacterium	45	248	10	24	279	1	1	153	187	32	5	12	61	3	3	320	34	0	14	18	12	1	1	12	10	70	399	58	38	18	7	2076
denovo7	Unassigned	0	78	0	0	0	0	0	0	0	2	0	267	1659	0	0	8	0	14	0	0	1	0	0	0	0	3	0	0	13	3	0	2048
denovo21	D_0__Bacteria; D_1__Fusobacteria; D_2__Fusobacteriia; D_3__Fusobacteriales; D_4__Fusobacteriaceae; D_5__Psychrilyobacter; D_6__uncultured bacterium	7	8	139	183	121	5	1	89	0	0	145	4	8	0	64	5	51	17	81	31	19	4	3	44	114	147	159	8	167	116	143	1883
denovo91	D_0__Bacteria; D_1__Tenericutes; D_2__Mollicutes; D_3__Mycoplasmatales; D_4__Mycoplasmataceae; D_5__Mycoplasma; D_6__uncultured bacterium	8	67	25	81	32	29	62	112	115	176	30	17	9	23	135	81	48	18	19	13	16	3	169	65	22	122	107	1	0	4	46	1655
denovo23	D_0__Bacteria; D_1__Tenericutes; D_2__Mollicutes; D_3__Mycoplasmatales; D_4__Mycoplasmataceae; D_5__Mycoplasma; D_6__uncultured bacterium	2	53	24	118	6	18	34	59	61	155	26	11	19	0	36	67	27	0	4	0	0	0	3	39	5	3	32	5	4	6	37	854
denovo1507	D_0__Bacteria; D_1__Tenericutes; D_2__Mollicutes; D_3__Mycoplasmatales; D_4__Mycoplasmataceae; D_5__Mycoplasma; D_6__uncultured bacterium	0	305	0	0	0	0	0	0	0	0	0	0	0	0	0	0	0	0	1	0	0	0	0	0	0	0	0	498	0	0	0	804
denovo16	Unassigned	0	2	0	6	3	0	0	0	4	0	0	5	37	0	1	3	0	100	176	57	32	41	149	4	0	0	1	2	7	0	0	630
denovo37	Unassigned	15	35	6	12	1	8	55	8	35	15	93	7	16	3	45	7	2	11	2	27	2	3	105	3	26	27	6	1	3	18	2	599
denovo28	Unassigned	0	0	8	4	0	0	0	0	491	1	0	0	0	1	0	0	0	0	0	0	0	5	0	0	0	0	4	0	0	0	0	514
denovo74	D_0__Bacteria; D_1__Tenericutes; D_2__Mollicutes; D_3__Mycoplasmatales; D_4__Mycoplasmataceae; D_5__Mycoplasma; D_6__uncultured bacterium	2	14	4	7	8	8	11	27	5	11	18	1	4	2	6	12	3	5	7	3	4	0	21	18	9	17	51	4	124	73	19	498
denovo6620	D_0__Bacteria; D_1__Tenericutes; D_2__Mollicutes; D_3__Mycoplasmatales; D_4__Mycoplasmataceae; D_5__Mycoplasma; D_6__uncultured bacterium	18	0	0	58	218	31	13	48	2	0	5	0	0	65	3	1	2	0	0	1	4	0	13	1	1	0	0	0	9	0	0	493
denovo27	D_0__Bacteria; D_1__Tenericutes; D_2__Mollicutes; D_3__Mycoplasmatales; D_4__Mycoplasmataceae; D_5__Mycoplasma; D_6__uncultured bacterium	0	13	1	12	5	11	30	32	7	4	12	2	5	0	8	3	5	1	4	0	4	0	4	17	6	5	51	9	95	81	6	433
denovo224	D_0__Bacteria; D_1__Tenericutes; D_2__Mollicutes; D_3__Mycoplasmatales; D_4__Mycoplasmataceae; D_5__Mycoplasma; D_6__uncultured bacterium	0	31	10	16	11	6	10	37	18	25	18	0	3	0	21	5	2	0	1	2	0	0	8	28	2	77	18	3	36	39	4	431
denovo6506	D_0__Bacteria; D_1__Fusobacteria; D_2__Fusobacteriia; D_3__Fusobacteriales; D_4__Fusobacteriaceae; D_5__Psychrilyobacter; D_6__uncultured bacterium	1	0	0	94	74	2	4	40	0	0	1	0	3	1	35	0	21	4	0	8	9	2	0	11	19	0	0	0	86	0	0	415
denovo1749	Unassigned	0	46	0	0	1	0	0	0	0	9	1	133	89	128	2	2	0	0	0	0	0	0	0	0	0	0	0	0	0	0	0	411
denovo6989	D_0__Bacteria; D_1__Tenericutes; D_2__Mollicutes; D_3__Mycoplasmatales; D_4__Mycoplasmataceae; D_5__Mycoplasma; D_6__uncultured bacterium	1	0	0	0	0	0	10	12	56	0	6	0	3	6	30	25	84	0	0	4	2	0	16	42	2	0	0	0	95	0	0	394
denovo6698	D_0__Bacteria; D_1__Tenericutes; D_2__Mollicutes; D_3__Mycoplasmatales; D_4__Mycoplasmataceae; D_5__Mycoplasma; D_6__uncultured bacterium	24	0	0	0	196	3	0	47	41	0	4	0	9	5	1	6	5	0	0	17	2	1	0	2	2	0	0	0	1	0	0	366
denovo1526	D_0__Bacteria; D_1__Tenericutes; D_2__Mollicutes; D_3__Mycoplasmatales; D_4__Mycoplasmataceae; D_5__Mycoplasma; D_6__uncultured bacterium	0	15	1	0	6	0	0	1	3	8	0	0	0	0	0	1	1	0	0	0	1	0	0	0	0	314	2	1	0	0	2	356
denovo7355	Unassigned	39	0	0	0	0	0	0	135	5	0	0	0	0	2	0	0	0	0	0	41	15	16	1	68	9	0	0	0	12	0	0	343
denovo176	D_0__Bacteria; D_1__Tenericutes; D_2__Mollicutes; D_3__Mycoplasmatales; D_4__Mycoplasmataceae; D_5__Mycoplasma; D_6__uncultured bacterium	0	15	2	14	3	8	9	18	18	10	9	5	2	5	17	19	12	0	2	6	7	0	41	11	9	34	15	0	18	9	9	327
denovo6533	Unassigned	16	0	0	1	106	0	0	73	21	0	0	0	0	4	2	21	12	0	0	10	8	10	0	30	4	0	0	0	3	0	0	321
denovo134	D_0__Bacteria; D_1__Tenericutes; D_2__Mollicutes; D_3__Mycoplasmatales; D_4__Mycoplasmataceae; D_5__Mycoplasma; D_6__uncultured bacterium	1	8	16	2	2	20	7	8	1	54	4	1	1	4	7	12	1	6	6	8	8	0	81	2	3	5	7	1	2	1	0	279
denovo2666	D_0__Bacteria; D_1__Tenericutes; D_2__Mollicutes; D_3__Mycoplasmatales; D_4__Mycoplasmataceae; D_5__Mycoplasma; D_6__uncultured bacterium	0	0	173	0	0	2	4	2	2	0	1	42	0	0	1	1	1	0	42	1	0	0	2	3	0	0	0	0	0	0	0	277
denovo39	Unassigned	5	1	0	0	12	0	1	0	194	0	0	0	3	0	2	8	6	0	0	0	0	2	0	0	10	7	0	3	0	0	0	254
denovo6	Unassigned	0	10	0	7	0	0	1	35	29	0	0	0	4	0	0	73	1	0	0	0	0	0	0	3	0	4	81	0	0	0	0	248
denovo35	D_0__Bacteria; D_1__Tenericutes; D_2__Mollicutes; D_3__Mycoplasmatales; D_4__Mycoplasmataceae; D_5__Mycoplasma; D_6__uncultured bacterium	2	15	1	6	1	19	87	18	6	3	13	0	4	0	2	8	13	0	0	2	0	0	0	0	0	24	7	1	0	1	3	236
denovo61	D_0__Bacteria; D_1__Tenericutes; D_2__Mollicutes; D_3__Mycoplasmatales; D_4__Mycoplasmataceae; D_5__Mycoplasma; D_6__uncultured bacterium	3	49	2	1	35	1	0	15	7	11	3	1	0	0	0	17	2	0	1	4	4	4	0	0	1	2	20	10	17	11	0	221
denovo6808	D_0__Bacteria; D_1__Tenericutes; D_2__Mollicutes; D_3__Mycoplasmatales; D_4__Mycoplasmataceae; D_5__Mycoplasma; D_6__uncultured bacterium	111	0	0	0	0	3	2	17	34	0	3	0	4	0	0	4	9	0	0	16	3	0	0	4	6	0	0	0	1	0	0	217
denovo7032	D_0__Bacteria; D_1__Tenericutes; D_2__Mollicutes; D_3__Mycoplasmatales; D_4__Mycoplasmataceae; D_5__Mycoplasma; D_6__uncultured bacterium	0	0	0	0	0	3	7	25	66	0	11	0	0	10	45	25	8	0	0	0	0	0	2	0	0	0	0	0	2	0	0	204
denovo1816	D_0__Bacteria; D_1__Tenericutes; D_2__Mollicutes; D_3__Mycoplasmatales; D_4__Mycoplasmataceae; D_5__Mycoplasma; D_6__uncultured bacterium	0	0	0	0	0	0	2	0	1	0	38	1	0	0	0	6	0	0	1	0	0	0	2	3	0	0	122	2	0	11	12	201
denovo99	Unassigned	0	2	2	5	0	0	0	0	155	2	0	0	0	2	0	0	0	0	0	0	0	20	0	0	0	2	3	0	1	0	0	194
denovo189	D_0__Bacteria; D_1__Tenericutes; D_2__Mollicutes; D_3__Mycoplasmatales; D_4__Mycoplasmataceae; D_5__Mycoplasma; D_6__uncultured bacterium	0	9	4	10	10	6	6	20	12	18	6	0	0	5	11	6	7	0	2	5	3	0	6	9	1	4	21	1	3	0	7	192
denovo1680	Unassigned	1	38	2	0	4	0	0	0	0	24	0	0	0	0	0	64	0	0	2	2	0	0	0	0	1	0	25	6	1	9	4	183
denovo25	D_0__Bacteria; D_1__Proteobacteria; D_2__Gammaproteobacteria; D_3__Vibrionales; D_4__Vibrionaceae; D_5__Vibrio	0	1	0	0	0	0	0	0	0	0	0	0	0	0	0	0	91	0	0	0	0	0	9	9	0	8	48	3	0	0	1	170
denovo1629	D_0__Bacteria; D_1__Tenericutes; D_2__Mollicutes; D_3__Mycoplasmatales; D_4__Mycoplasmataceae; D_5__Mycoplasma; D_6__uncultured bacterium	1	132	0	3	1	0	2	1	0	5	0	0	0	0	2	1	0	0	0	0	0	0	0	0	0	0	4	0	0	0	13	165
denovo1004	D_0__Bacteria; D_1__Tenericutes; D_2__Mollicutes; D_3__Mycoplasmatales; D_4__Mycoplasmataceae; D_5__Mycoplasma; D_6__uncultured bacterium	1	62	0	0	0	0	0	0	0	8	0	0	0	0	0	35	0	0	0	0	0	0	0	0	0	17	19	2	0	3	0	147
denovo3347	D_0__Bacteria; D_1__Tenericutes; D_2__Mollicutes; D_3__Mycoplasmatales; D_4__Mycoplasmataceae; D_5__Mycoplasma; D_6__uncultured bacterium	0	0	49	14	2	31	17	0	8	0	1	11	0	0	1	0	3	0	4	0	0	0	1	3	0	0	0	0	1	0	0	146
denovo5674	D_0__Bacteria; D_1__Tenericutes; D_2__Mollicutes; D_3__Mycoplasmatales; D_4__Mycoplasmataceae; D_5__Mycoplasma; D_6__uncultured bacterium	0	0	0	10	8	12	4	3	3	0	0	0	0	1	1	1	0	1	0	0	0	0	12	2	0	0	0	0	85	0	0	143
denovo1697	D_0__Bacteria; D_1__Tenericutes; D_2__Mollicutes; D_3__Mycoplasmatales; D_4__Mycoplasmataceae; D_5__Mycoplasma; D_6__uncultured bacterium	0	95	0	0	1	0	0	5	1	4	8	0	0	1	0	2	1	1	0	0	0	0	0	1	0	0	0	0	0	0	12	132
denovo6609	D_0__Bacteria; D_1__Tenericutes; D_2__Mollicutes; D_3__Mycoplasmatales; D_4__Mycoplasmataceae; D_5__Mycoplasma; D_6__uncultured bacterium	0	0	0	31	33	25	16	12	1	0	1	0	0	0	1	1	2	1	0	0	1	0	2	0	0	0	0	0	0	0	0	127
denovo6563	D_0__Bacteria; D_1__Tenericutes; D_2__Mollicutes; D_3__Mycoplasmatales; D_4__Mycoplasmataceae; D_5__Mycoplasma; D_6__uncultured bacterium	3	0	0	41	11	5	35	14	6	0	1	0	1	1	1	0	3	0	0	0	0	0	3	0	0	0	0	0	1	0	0	126
denovo1759	D_0__Bacteria; D_1__Tenericutes; D_2__Mollicutes; D_3__Mycoplasmatales; D_4__Mycoplasmataceae; D_5__Mycoplasma; D_6__uncultured bacterium	0	4	0	0	0	1	2	1	1	2	19	0	0	0	0	0	0	0	0	0	0	0	0	0	0	0	7	0	1	71	11	120
denovo597	D_0__Bacteria; D_1__Tenericutes; D_2__Mollicutes; D_3__Mycoplasmatales; D_4__Mycoplasmataceae; D_5__Mycoplasma; D_6__uncultured bacterium	2	24	2	0	5	0	0	0	3	14	0	0	1	0	0	29	0	0	0	0	0	1	0	0	0	5	19	10	1	4	0	120
denovo191	D_0__Bacteria; D_1__Tenericutes; D_2__Mollicutes; D_3__Mycoplasmatales; D_4__Mycoplasmataceae; D_5__Mycoplasma; D_6__uncultured bacterium	0	4	0	8	5	2	4	10	7	3	4	0	0	0	6	6	2	1	2	7	5	1	9	9	0	9	3	0	5	0	2	114
denovo1541	D_0__Bacteria; D_1__Tenericutes; D_2__Mollicutes; D_3__Mycoplasmatales; D_4__Mycoplasmataceae; D_5__Mycoplasma; D_6__uncultured bacterium	0	6	2	0	0	0	0	1	0	2	1	0	0	0	1	0	0	0	1	0	0	0	0	0	0	92	3	0	0	1	3	113
denovo65	D_0__Bacteria; D_1__Tenericutes; D_2__Mollicutes; D_3__Mycoplasmatales; D_4__Mycoplasmataceae; D_5__Mycoplasma; D_6__uncultured bacterium	0	5	2	29	0	0	0	7	0	12	4	1	7	0	8	20	0	0	0	0	0	0	1	9	0	0	0	0	2	2	4	113
denovo185	D_0__Bacteria; D_1__Tenericutes; D_2__Mollicutes; D_3__Mycoplasmatales; D_4__Mycoplasmataceae; D_5__Mycoplasma; D_6__uncultured bacterium	0	0	6	0	0	5	0	0	0	5	1	0	0	1	3	7	0	10	6	0	2	0	57	0	1	0	3	1	2	1	0	111
denovo1823	D_0__Bacteria; D_1__Tenericutes; D_2__Mollicutes; D_3__Mycoplasmatales; D_4__Mycoplasmataceae; D_5__Mycoplasma; D_6__uncultured bacterium	0	0	2	0	1	0	0	0	0	26	25	1	0	0	0	9	0	0	0	0	0	0	0	0	0	0	5	1	0	3	37	110
denovo92	D_0__Bacteria; D_1__Tenericutes; D_2__Mollicutes; D_3__Mycoplasmatales; D_4__Mycoplasmataceae; D_5__Mycoplasma; D_6__uncultured bacterium	1	6	1	3	3	6	28	5	0	4	7	0	1	0	7	16	1	0	0	0	1	0	4	2	1	3	3	0	0	2	4	109
denovo7052	D_0__Bacteria; D_1__Tenericutes; D_2__Mollicutes; D_3__Mycoplasmatales; D_4__Mycoplasmataceae; D_5__Mycoplasma; D_6__uncultured bacterium	0	0	0	0	0	1	0	27	10	0	17	0	3	0	12	2	5	0	0	0	0	0	10	13	5	0	0	0	3	0	0	108
denovo211	Unassigned	0	3	0	1	27	0	0	4	3	25	0	0	0	0	0	6	2	0	0	0	0	1	0	9	0	4	9	2	9	2	1	108
denovo6937	D_0__Bacteria; D_1__Tenericutes; D_2__Mollicutes; D_3__Mycoplasmatales; D_4__Mycoplasmataceae; D_5__Mycoplasma; D_6__uncultured bacterium	1	0	0	0	0	1	81	3	1	0	1	0	0	0	3	0	12	0	0	0	0	0	2	2	0	0	0	0	0	0	0	107
denovo6048	Unassigned	4	0	0	1	70	0	0	11	4	0	0	0	0	0	1	6	5	1	0	1	0	0	0	1	0	0	0	0	1	0	0	106
denovo6700	D_0__Bacteria; D_1__Tenericutes; D_2__Mollicutes; D_3__Mycoplasmatales; D_4__Mycoplasmataceae; D_5__Mycoplasma; D_6__uncultured bacterium	5	0	0	0	44	0	0	26	10	0	0	0	8	1	0	7	0	0	0	0	1	0	0	2	0	0	0	0	1	0	0	105
denovo1832	D_0__Bacteria; D_1__Tenericutes; D_2__Mollicutes; D_3__Mycoplasmatales; D_4__Mycoplasmataceae; D_5__Mycoplasma; D_6__uncultured bacterium	1	0	2	0	5	0	0	2	0	10	13	0	0	0	1	36	0	0	1	0	0	0	1	0	0	0	12	0	0	5	15	104
denovo6548	D_0__Bacteria; D_1__Tenericutes; D_2__Mollicutes; D_3__Mycoplasmatales; D_4__Mycoplasmataceae; D_5__Mycoplasma; D_6__uncultured bacterium	1	0	0	64	5	23	0	3	1	0	1	0	0	2	0	0	2	0	0	0	0	0	0	0	0	0	0	0	2	0	0	104
denovo4988	D_0__Bacteria; D_1__Fusobacteria; D_2__Fusobacteriia; D_3__Fusobacteriales; D_4__Fusobacteriaceae; D_5__Psychrilyobacter; D_6__uncultured bacterium	0	0	0	22	10	0	0	12	0	0	1	0	1	0	12	0	7	1	0	3	5	0	0	1	8	0	0	0	20	0	0	103
denovo4558	D_0__Bacteria; D_1__Tenericutes; D_2__Mollicutes; D_3__Mycoplasmatales; D_4__Mycoplasmataceae; D_5__Mycoplasma; D_6__uncultured bacterium	4	0	0	45	5	1	2	9	13	0	2	0	7	0	2	0	4	0	1	0	0	0	0	5	2	0	0	0	0	0	0	102
denovo3309	Unassigned	10	0	0	0	29	0	0	21	5	0	0	0	0	1	0	7	3	0	9	4	2	0	0	5	3	0	0	0	2	0	0	101
denovo1807	D_0__Bacteria; D_1__Tenericutes; D_2__Mollicutes; D_3__Mycoplasmatales; D_4__Mycoplasmataceae; D_5__Mycoplasma; D_6__uncultured bacterium	5	0	4	0	1	2	0	0	0	3	2	2	0	0	0	17	0	0	2	1	2	0	1	0	1	0	29	4	13	9	2	100
denovo6607	D_0__Bacteria; D_1__Tenericutes; D_2__Mollicutes; D_3__Mycoplasmatales; D_4__Mycoplasmataceae; D_5__Mycoplasma; D_6__uncultured bacterium	1	0	0	30	4	13	5	20	19	0	0	0	0	0	2	1	1	0	0	0	1	0	0	0	0	0	0	0	0	0	0	97
denovo208	D_0__Bacteria; D_1__Tenericutes; D_2__Mollicutes; D_3__Mycoplasmatales; D_4__Mycoplasmataceae; D_5__Mycoplasma; D_6__uncultured bacterium	0	5	0	1	3	0	7	11	6	7	11	0	0	0	10	6	6	0	0	1	0	0	0	6	2	5	5	0	0	0	2	94
denovo1678	D_0__Bacteria; D_1__Tenericutes; D_2__Mollicutes; D_3__Mycoplasmatales; D_4__Mycoplasmataceae; D_5__Mycoplasma; D_6__uncultured bacterium	0	37	0	2	0	0	0	2	0	4	5	0	0	0	0	1	0	0	0	0	0	0	0	1	0	0	9	0	0	3	28	92
denovo4473	Unassigned	5	0	0	7	4	6	6	2	7	0	13	0	3	2	12	0	1	4	1	3	0	0	7	1	7	0	0	0	1	0	0	92
denovo5769	D_0__Bacteria; D_1__Tenericutes; D_2__Mollicutes; D_3__Mycoplasmatales; D_4__Mycoplasmataceae; D_5__Mycoplasma; D_6__uncultured bacterium	4	0	0	9	38	0	0	8	8	0	1	0	1	4	1	1	0	0	0	5	1	3	0	0	4	0	0	0	2	0	0	90
denovo1539	D_0__Bacteria; D_1__Tenericutes; D_2__Mollicutes; D_3__Mycoplasmatales; D_4__Mycoplasmataceae; D_5__Mycoplasma; D_6__uncultured bacterium	0	6	15	0	0	0	1	0	0	17	5	1	0	0	0	11	0	0	0	0	0	0	0	0	0	29	1	2	0	0	1	89
denovo1603	D_0__Bacteria; D_1__Tenericutes; D_2__Mollicutes; D_3__Mycoplasmatales; D_4__Mycoplasmataceae; D_5__Mycoplasma; D_6__uncultured bacterium	0	24	3	0	0	0	0	0	0	17	3	0	0	0	0	12	0	0	0	0	0	0	0	0	0	0	1	1	0	5	23	89
denovo7406	D_0__Bacteria; D_1__Tenericutes; D_2__Mollicutes; D_3__Mycoplasmatales; D_4__Mycoplasmataceae; D_5__Mycoplasma; D_6__uncultured bacterium	0	0	0	0	0	1	0	0	25	0	0	0	3	3	0	0	0	1	0	1	0	0	3	49	1	0	0	0	1	0	0	88
denovo2368	D_0__Bacteria; D_1__Fusobacteria; D_2__Fusobacteriia; D_3__Fusobacteriales; D_4__Fusobacteriaceae; D_5__Psychrilyobacter; D_6__uncultured bacterium	0	0	38	3	0	0	0	1	0	0	0	5	0	0	0	0	1	1	36	0	0	0	0	0	0	0	0	0	1	0	0	86
denovo40	D_0__Bacteria; D_1__Tenericutes; D_2__Mollicutes; D_3__Mycoplasmatales; D_4__Mycoplasmataceae; D_5__Mycoplasma; D_6__uncultured bacterium	2	9	1	2	4	5	5	3	11	5	3	0	1	0	3	17	2	0	1	0	1	1	0	2	0	0	6	0	1	0	1	86
denovo6560	D_0__Bacteria; D_1__Tenericutes; D_2__Mollicutes; D_3__Mycoplasmatales; D_4__Mycoplasmataceae; D_5__Mycoplasma; D_6__uncultured bacterium	3	0	0	16	5	24	16	12	0	0	1	0	0	2	0	0	0	0	0	0	1	0	3	0	1	0	0	0	1	0	0	85
denovo3	D_0__Bacteria; D_1__Tenericutes; D_2__Mollicutes; D_3__Mycoplasmatales; D_4__Mycoplasmataceae; D_5__Mycoplasma; D_6__uncultured bacterium	0	0	0	4	2	0	41	0	3	0	0	1	2	0	5	1	3	0	1	0	0	0	0	0	0	0	17	0	0	0	4	84
denovo1147	Unassigned	2	7	1	3	0	0	11	0	5	0	25	0	3	0	11	1	0	0	0	0	0	0	2	0	1	8	0	0	0	2	2	84
denovo987	D_0__Bacteria; D_1__Tenericutes; D_2__Mollicutes; D_3__Mycoplasmatales; D_4__Mycoplasmataceae; D_5__Mycoplasma; D_6__uncultured bacterium	0	1	0	0	1	0	0	1	1	4	9	0	0	0	0	0	2	0	0	0	0	0	0	0	0	2	2	5	2	50	1	81
denovo6514	D_0__Bacteria; D_1__Tenericutes; D_2__Mollicutes; D_3__Mycoplasmatales; D_4__Mycoplasmataceae; D_5__Mycoplasma; D_6__uncultured bacterium	0	0	0	27	1	27	15	4	1	0	0	0	0	1	0	0	1	0	0	0	0	0	1	0	0	0	0	0	1	0	0	79
denovo1112	Unassigned	0	1	5	3	0	1	10	1	1	10	24	1	1	1	3	0	0	1	0	1	0	0	2	0	3	2	1	1	0	5	1	79
denovo14	D_0__Bacteria; D_1__Proteobacteria; D_2__Alphaproteobacteria; D_3__Rickettsiales; D_4__Anaplasmataceae; D_5__Candidatus Xenohaliotis; D_6__Candidatus Xenohaliotis californiensis	0	4	1	6	0	0	10	9	0	7	4	0	1	1	0	0	19	0	4	0	0	0	0	8	0	2	0	0	0	0	0	76
denovo268	D_0__Bacteria; D_1__Tenericutes; D_2__Mollicutes; D_3__Mycoplasmatales; D_4__Mycoplasmataceae; D_5__Mycoplasma; D_6__uncultured bacterium	0	5	3	1	0	27	10	7	1	8	2	0	0	0	0	0	0	0	0	0	0	0	0	0	0	1	6	0	2	0	0	73
denovo6619	D_0__Bacteria; D_1__Tenericutes; D_2__Mollicutes; D_3__Mycoplasmatales; D_4__Mycoplasmataceae; D_5__Mycoplasma; D_6__uncultured bacterium	1	0	0	4	9	0	13	32	3	0	0	0	0	0	3	1	4	0	0	0	0	0	1	2	0	0	0	0	0	0	0	73
denovo6797	D_0__Bacteria; D_1__Tenericutes; D_2__Mollicutes; D_3__Mycoplasmatales; D_4__Mycoplasmataceae; D_5__Mycoplasma; D_6__uncultured bacterium	5	0	0	0	0	0	49	1	1	0	0	0	0	0	1	0	2	0	0	1	0	1	1	0	0	0	0	0	10	0	0	72
denovo6881	D_0__Bacteria; D_1__Tenericutes; D_2__Mollicutes; D_3__Mycoplasmatales; D_4__Mycoplasmataceae; D_5__Mycoplasma; D_6__uncultured bacterium	11	0	0	0	0	2	28	0	3	0	2	0	0	3	1	1	5	0	0	0	0	0	0	0	0	0	0	0	13	0	0	69
denovo6962	D_0__Bacteria; D_1__Tenericutes; D_2__Mollicutes; D_3__Mycoplasmatales; D_4__Mycoplasmataceae; D_5__Mycoplasma; D_6__uncultured bacterium	0	0	0	0	0	4	30	2	6	0	0	0	0	3	3	1	10	1	0	1	0	0	0	2	0	0	0	0	4	0	0	67
denovo5889	D_0__Bacteria; D_1__Tenericutes; D_2__Mollicutes; D_3__Mycoplasmatales; D_4__Mycoplasmataceae; D_5__Mycoplasma; D_6__uncultured bacterium	8	0	0	5	31	0	0	4	4	0	2	0	0	2	0	0	0	0	0	3	1	2	0	0	3	0	0	0	1	0	0	66
denovo1582	D_0__Bacteria; D_1__Tenericutes; D_2__Mollicutes; D_3__Mycoplasmatales; D_4__Mycoplasmataceae; D_5__Mycoplasma; D_6__uncultured bacterium	0	3	0	0	0	0	1	1	1	2	2	0	0	0	0	0	1	0	0	0	0	0	1	0	0	52	1	0	0	0	0	65
denovo1953	Unassigned	3	0	1	0	9	0	0	0	0	12	0	0	0	0	0	0	0	0	0	0	0	0	0	0	0	0	37	3	0	0	0	65
denovo1773	D_0__Bacteria; D_1__Tenericutes; D_2__Mollicutes; D_3__Mycoplasmatales; D_4__Mycoplasmataceae; D_5__Mycoplasma; D_6__uncultured bacterium	0	8	0	1	0	0	0	1	0	1	3	0	0	1	3	1	0	1	0	0	0	0	0	3	0	0	2	0	0	1	37	63
denovo511	D_0__Bacteria; D_1__Fusobacteria; D_2__Fusobacteriia; D_3__Fusobacteriales; D_4__Fusobacteriaceae; D_5__Psychrilyobacter; D_6__uncultured bacterium	0	0	3	2	2	0	0	4	0	0	6	1	0	0	1	0	1	1	7	1	0	1	0	0	1	7	0	0	7	13	4	62
denovo6503	D_0__Bacteria; D_1__Tenericutes; D_2__Mollicutes; D_3__Mycoplasmatales; D_4__Mycoplasmataceae; D_5__Mycoplasma; D_6__uncultured bacterium	1	0	0	31	5	8	1	3	7	0	0	0	0	0	3	0	2	0	0	0	0	0	0	0	0	0	0	0	1	0	0	62
denovo6626	D_0__Bacteria; D_1__Tenericutes; D_2__Mollicutes; D_3__Mycoplasmatales; D_4__Mycoplasmataceae; D_5__Mycoplasma; D_6__uncultured bacterium	1	0	0	3	0	3	9	8	3	0	4	0	2	0	2	0	13	0	0	0	0	0	4	4	2	0	0	0	4	0	0	62
denovo2050	D_0__Bacteria; D_1__Fusobacteria; D_2__Fusobacteriia; D_3__Fusobacteriales; D_4__Fusobacteriaceae; D_5__Psychrilyobacter; D_6__uncultured bacterium	0	0	13	0	9	0	0	3	0	0	0	1	0	0	0	0	0	1	24	1	0	0	0	0	0	0	0	0	9	0	0	61
denovo1795	D_0__Bacteria; D_1__Tenericutes; D_2__Mollicutes; D_3__Mycoplasmatales; D_4__Mycoplasmataceae; D_5__Mycoplasma; D_6__uncultured bacterium	10	0	3	1	0	0	0	2	0	3	1	0	0	2	0	1	0	0	4	3	4	0	0	0	1	0	6	0	10	9	1	61
denovo12	D_0__Bacteria; D_1__Tenericutes; D_2__Mollicutes; D_3__Mycoplasmatales; D_4__Mycoplasmataceae; D_5__Mycoplasma; D_6__uncultured bacterium	0	3	0	6	1	0	0	0	0	0	0	0	0	0	4	0	0	0	1	0	0	0	9	2	0	0	33	0	0	1	0	60
denovo1606	D_0__Bacteria; D_1__Tenericutes; D_2__Mollicutes; D_3__Mycoplasmatales; D_4__Mycoplasmataceae; D_5__Mycoplasma; D_6__uncultured bacterium	0	21	1	0	7	0	0	0	0	9	3	0	0	0	0	1	0	0	0	0	0	0	0	0	0	0	1	4	0	5	8	60
denovo1581	D_0__Bacteria; D_1__Tenericutes; D_2__Mollicutes; D_3__Mycoplasmatales; D_4__Mycoplasmataceae; D_5__Mycoplasma; D_6__uncultured bacterium	0	2	0	1	0	1	1	3	2	0	2	0	0	0	3	1	0	0	0	0	0	0	0	0	0	41	0	0	0	0	2	59
denovo6616	Unassigned	0	0	0	1	33	0	0	6	2	0	0	0	0	0	0	7	1	0	0	0	0	0	3	1	0	0	0	0	4	0	0	58
denovo294	Unassigned	5	2	0	0	7	0	0	5	1	18	0	0	0	0	0	3	1	0	4	1	0	1	0	0	0	0	6	0	0	0	0	54
denovo1569	D_0__Bacteria; D_1__Tenericutes; D_2__Mollicutes; D_3__Mycoplasmatales; D_4__Mycoplasmataceae; D_5__Mycoplasma; D_6__uncultured bacterium	0	17	0	0	1	0	0	0	1	3	0	0	0	0	0	7	0	0	0	0	0	0	0	0	0	4	18	1	0	1	0	53
denovo5793	Unassigned	8	0	0	1	11	0	0	6	0	0	0	0	0	2	0	1	0	0	0	6	2	5	0	2	1	0	0	0	8	0	0	53
denovo178	D_0__Bacteria; D_1__Tenericutes; D_2__Mollicutes; D_3__Mycoplasmatales; D_4__Mycoplasmataceae; D_5__Mycoplasma; D_6__uncultured bacterium	0	0	0	1	0	1	0	0	0	1	0	0	0	0	3	0	0	2	0	0	4	1	29	1	4	1	1	0	0	1	1	51
denovo1876	D_0__Bacteria; D_1__Tenericutes; D_2__Mollicutes; D_3__Mycoplasmatales; D_4__Mycoplasmataceae; D_5__Mycoplasma; D_6__uncultured bacterium	0	0	0	0	1	0	1	0	0	2	4	0	0	0	1	9	0	0	1	0	0	0	0	0	1	0	21	3	0	7	0	51
denovo4590	D_0__Bacteria; D_1__Tenericutes; D_2__Mollicutes; D_3__Mycoplasmatales; D_4__Mycoplasmataceae; D_5__Mycoplasma; D_6__uncultured bacterium	0	0	0	0	1	0	0	0	0	0	0	0	0	1	0	1	0	1	39	0	3	0	2	1	1	0	0	0	1	0	0	51
denovo7210	D_0__Bacteria; D_1__Tenericutes; D_2__Mollicutes; D_3__Mycoplasmatales; D_4__Mycoplasmataceae; D_5__Mycoplasma; D_6__uncultured bacterium	3	0	0	0	0	0	0	6	9	0	7	0	9	2	0	9	0	0	0	0	4	0	0	1	0	0	0	0	1	0	0	51
denovo1460	Unassigned	0	4	0	0	1	0	0	1	2	13	0	0	0	0	0	3	0	0	2	0	0	0	0	0	0	16	8	0	1	0	0	51
denovo6540	Unassigned	1	0	0	2	37	0	0	4	0	0	0	0	0	0	1	0	2	0	0	0	0	0	0	2	0	0	0	0	2	0	0	51
denovo1635	D_0__Bacteria; D_1__Tenericutes; D_2__Mollicutes; D_3__Mycoplasmatales; D_4__Mycoplasmataceae; D_5__Mycoplasma; D_6__uncultured bacterium	0	12	9	0	0	3	0	2	3	4	1	0	3	0	1	3	0	0	2	0	0	0	1	1	0	0	2	0	0	0	3	50
denovo6681	D_0__Bacteria; D_1__Tenericutes; D_2__Mollicutes; D_3__Mycoplasmatales; D_4__Mycoplasmataceae; D_5__Mycoplasma; D_6__uncultured bacterium	0	0	0	0	31	0	0	8	5	0	2	0	0	0	0	0	1	0	0	1	1	0	0	1	0	0	0	0	0	0	0	50
denovo920	D_0__Bacteria; D_1__Tenericutes; D_2__Mollicutes; D_3__Mycoplasmatales; D_4__Mycoplasmataceae; D_5__Mycoplasma; D_6__uncultured bacterium	0	6	0	0	1	0	1	0	0	5	2	0	0	0	0	1	0	1	0	0	0	0	0	3	0	23	3	0	0	2	2	50
denovo6623	D_0__Bacteria; D_1__Tenericutes; D_2__Mollicutes; D_3__Mycoplasmatales; D_4__Mycoplasmataceae; D_5__Mycoplasma; D_6__uncultured bacterium	0	0	0	4	20	4	2	10	0	0	0	0	0	3	2	0	1	0	0	0	1	0	0	0	0	0	0	0	2	0	0	49
denovo1500	D_0__Bacteria; D_1__Tenericutes; D_2__Mollicutes; D_3__Mycoplasmatales; D_4__Mycoplasmataceae; D_5__Mycoplasma; D_6__uncultured bacterium	0	2	2	0	0	0	0	0	0	8	5	5	0	2	0	0	0	0	6	1	8	0	1	0	0	6	1	0	0	0	0	47
denovo259	D_0__Bacteria; D_1__Tenericutes; D_2__Mollicutes; D_3__Mycoplasmatales; D_4__Mycoplasmataceae; D_5__Mycoplasma; D_6__uncultured bacterium	0	12	0	2	7	0	0	2	5	1	1	1	1	0	0	5	0	0	0	0	0	0	0	0	0	2	6	1	1	0	0	47
denovo7643	D_0__Bacteria; D_1__Fusobacteria; D_2__Fusobacteriia; D_3__Fusobacteriales; D_4__Fusobacteriaceae; D_5__Psychrilyobacter; D_6__uncultured bacterium	0	0	0	0	0	0	0	0	0	0	0	0	0	0	0	0	0	4	0	16	1	1	1	0	22	0	0	0	1	0	0	46
denovo3019	D_0__Bacteria; D_1__Tenericutes; D_2__Mollicutes; D_3__Mycoplasmatales; D_4__Mycoplasmataceae; D_5__Mycoplasma; D_6__uncultured bacterium	0	0	1	3	1	0	13	7	0	0	0	0	5	0	4	0	0	0	5	1	0	0	1	4	1	0	0	0	0	0	0	46
denovo49	Unassigned	0	12	2	0	0	0	0	0	3	0	0	0	0	0	0	7	2	0	0	0	0	3	0	0	0	6	1	10	0	0	0	46
denovo2377	D_0__Bacteria; D_1__Tenericutes; D_2__Mollicutes; D_3__Mycoplasmatales; D_4__Mycoplasmataceae; D_5__Mycoplasma; D_6__uncultured bacterium	0	0	0	2	2	1	6	5	0	0	0	1	1	0	4	2	0	0	0	0	0	0	1	3	0	0	0	0	17	0	0	45
denovo301	D_0__Bacteria; D_1__Tenericutes; D_2__Mollicutes; D_3__Mycoplasmatales; D_4__Mycoplasmataceae; D_5__Mycoplasma; D_6__uncultured bacterium	0	0	9	0	0	1	1	0	1	15	3	2	0	2	1	0	0	0	2	0	0	0	3	1	0	0	1	0	1	0	0	43
denovo6985	D_0__Bacteria; D_1__Tenericutes; D_2__Mollicutes; D_3__Mycoplasmatales; D_4__Mycoplasmataceae; D_5__Mycoplasma; D_6__uncultured bacterium	0	0	0	0	0	0	1	5	5	0	1	0	1	1	5	3	7	0	0	1	6	1	0	4	1	0	0	0	1	0	0	43
denovo3838	Unassigned	6	0	0	0	26	0	0	1	3	0	0	0	0	0	0	0	1	0	6	0	0	0	0	0	0	0	0	0	0	0	0	43
denovo1636	D_0__Bacteria; D_1__Tenericutes; D_2__Mollicutes; D_3__Mycoplasmatales; D_4__Mycoplasmataceae; D_5__Mycoplasma; D_6__uncultured bacterium	0	15	0	0	0	0	0	0	0	11	1	1	0	0	0	1	0	0	0	0	1	0	0	0	0	0	4	2	0	3	3	42
denovo2338	D_0__Bacteria; D_1__Tenericutes; D_2__Mollicutes; D_3__Mycoplasmatales; D_4__Mycoplasmataceae; D_5__Mycoplasma; D_6__uncultured bacterium	4	0	5	0	4	0	0	2	11	10	2	0	0	0	2	0	0	0	0	0	0	0	2	0	0	0	0	0	0	0	0	42
denovo6760	D_0__Bacteria; D_1__Tenericutes; D_2__Mollicutes; D_3__Mycoplasmatales; D_4__Mycoplasmataceae; D_5__Mycoplasma; D_6__uncultured bacterium	0	0	0	0	5	5	5	4	0	0	1	0	2	0	6	0	0	0	0	1	0	0	1	1	0	0	0	0	11	0	0	42
denovo5282	D_0__Bacteria; D_1__Fusobacteria; D_2__Fusobacteriia; D_3__Fusobacteriales; D_4__Fusobacteriaceae; D_5__Psychrilyobacter; D_6__uncultured bacterium	0	0	0	9	10	0	0	6	0	0	0	0	1	0	1	0	5	1	0	1	0	0	0	2	1	0	0	0	4	0	0	41
denovo4589	D_0__Bacteria; D_1__Tenericutes; D_2__Mollicutes; D_3__Mycoplasmatales; D_4__Mycoplasmataceae; D_5__Mycoplasma; D_6__uncultured bacterium	0	0	0	2	1	1	3	4	2	0	0	0	0	0	1	0	0	0	22	0	1	0	1	2	0	0	0	0	1	0	0	41
denovo5503	D_0__Bacteria; D_1__Tenericutes; D_2__Mollicutes; D_3__Mycoplasmatales; D_4__Mycoplasmataceae; D_5__Mycoplasma; D_6__uncultured bacterium	0	0	0	24	0	0	0	7	3	0	0	0	0	0	4	0	1	0	0	0	0	0	1	0	1	0	0	0	0	0	0	41
denovo60	D_0__Bacteria; D_1__Tenericutes; D_2__Mollicutes; D_3__Mycoplasmatales; D_4__Mycoplasmataceae; D_5__Mycoplasma; D_6__uncultured bacterium	1	11	0	0	4	0	0	1	0	1	0	0	0	0	0	3	7	0	1	0	0	0	0	2	0	0	0	4	5	1	0	41
denovo1639	D_0__Bacteria; D_1__Tenericutes; D_2__Mollicutes; D_3__Mycoplasmatales; D_4__Mycoplasmataceae; D_5__Mycoplasma; D_6__uncultured bacterium	0	22	0	0	1	1	0	0	0	4	3	0	1	0	0	1	0	2	0	0	0	0	1	0	0	0	0	0	0	1	3	40
denovo271	D_0__Bacteria; D_1__Tenericutes; D_2__Mollicutes; D_3__Mycoplasmatales; D_4__Mycoplasmataceae; D_5__Mycoplasma; D_6__uncultured bacterium	0	1	3	1	0	4	0	6	0	12	3	1	0	0	0	0	0	0	0	0	0	0	1	0	0	0	3	0	0	0	5	40
denovo7011	D_0__Bacteria; D_1__Tenericutes; D_2__Mollicutes; D_3__Mycoplasmatales; D_4__Mycoplasmataceae; D_5__Mycoplasma; D_6__uncultured bacterium	0	0	0	0	0	0	7	1	12	0	1	0	0	3	3	0	4	3	0	0	0	1	2	2	0	0	0	0	0	0	0	39
denovo1259	D_0__Bacteria; D_1__Tenericutes; D_2__Mollicutes; D_3__Mycoplasmatales; D_4__Mycoplasmataceae; D_5__Mycoplasma; D_6__uncultured bacterium	1	3	0	0	3	0	0	1	0	4	2	0	0	0	0	1	0	0	0	0	0	0	0	0	0	5	0	1	0	14	3	38
denovo1508	D_0__Bacteria; D_1__Tenericutes; D_2__Mollicutes; D_3__Mycoplasmatales; D_4__Mycoplasmataceae; D_5__Mycoplasma; D_6__uncultured bacterium	0	3	0	0	0	0	0	0	0	22	5	0	0	0	0	6	0	0	0	0	0	0	0	0	0	0	0	0	1	0	1	38
denovo193	D_0__Bacteria; D_1__Tenericutes; D_2__Mollicutes; D_3__Mycoplasmatales; D_4__Mycoplasmataceae; D_5__Mycoplasma; D_6__uncultured bacterium	0	4	0	1	2	0	0	0	2	0	0	0	0	0	3	7	1	0	0	1	0	0	5	2	0	3	2	1	0	4	0	38
denovo2675	Unassigned	2	0	6	3	0	2	5	1	3	0	2	0	2	0	3	0	0	0	0	1	0	1	4	1	1	0	0	0	1	0	0	38
denovo46	Unassigned	0	0	1	0	0	0	0	0	0	6	15	0	0	6	0	0	0	0	0	0	0	0	5	0	2	0	0	0	3	0	0	38
denovo5152	D_0__Bacteria; D_1__Fusobacteria; D_2__Fusobacteriia; D_3__Fusobacteriales; D_4__Fusobacteriaceae; D_5__Psychrilyobacter; D_6__uncultured bacterium	1	0	0	5	4	0	0	3	0	0	0	0	0	0	3	0	2	0	0	2	2	0	0	1	0	0	0	0	14	0	0	37
denovo169	D_0__Bacteria; D_1__Tenericutes; D_2__Mollicutes; D_3__Mycoplasmatales; D_4__Mycoplasmataceae; D_5__Mycoplasma; D_6__uncultured bacterium	0	8	0	0	1	0	0	3	3	1	0	0	1	0	0	4	0	0	0	1	0	0	3	2	0	5	5	0	0	0	0	37
denovo6595	D_0__Bacteria; D_1__Tenericutes; D_2__Mollicutes; D_3__Mycoplasmatales; D_4__Mycoplasmataceae; D_5__Mycoplasma; D_6__uncultured bacterium	1	0	0	10	15	1	0	2	0	0	0	0	0	1	0	4	1	0	0	0	0	0	0	0	1	0	0	0	1	0	0	37
denovo4244	D_0__Bacteria; D_1__Tenericutes; D_2__Mollicutes; D_3__Mycoplasmatales; D_4__Mycoplasmataceae; D_5__Mycoplasma; D_6__uncultured bacterium	0	0	0	4	1	3	1	1	1	0	1	11	0	3	0	1	0	0	7	0	1	0	1	0	0	0	0	0	0	0	0	36
denovo6098	D_0__Bacteria; D_1__Tenericutes; D_2__Mollicutes; D_3__Mycoplasmatales; D_4__Mycoplasmataceae; D_5__Mycoplasma; D_6__uncultured bacterium	1	0	0	2	8	3	0	5	2	0	0	0	0	0	0	2	0	0	0	1	5	1	0	1	0	0	0	0	5	0	0	36
denovo7434	D_0__Bacteria; D_1__Tenericutes; D_2__Mollicutes; D_3__Mycoplasmatales; D_4__Mycoplasmataceae; D_5__Mycoplasma; D_6__uncultured bacterium	2	0	0	0	0	0	0	0	0	0	0	0	3	3	0	0	0	0	0	3	6	10	1	0	0	0	0	0	8	0	0	36
denovo285	D_0__Bacteria; D_1__Tenericutes; D_2__Mollicutes; D_3__Mycoplasmatales; D_4__Mycoplasmataceae; D_5__Mycoplasma; D_6__uncultured bacterium	0	3	0	0	0	1	0	0	0	2	1	0	0	0	0	0	0	0	1	0	0	1	0	2	0	0	3	11	9	1	0	35
denovo1038	Unassigned	1	0	1	1	0	0	0	0	0	4	1	0	0	15	0	0	0	0	0	0	0	0	8	0	1	0	0	0	1	2	0	35
denovo183	Unassigned	0	2	1	0	0	0	0	1	0	7	2	0	0	1	1	0	0	0	0	1	0	0	7	0	11	1	0	0	0	0	0	35
denovo5345	D_0__Bacteria; D_1__Fusobacteria; D_2__Fusobacteriia; D_3__Fusobacteriales; D_4__Fusobacteriaceae; D_5__Psychrilyobacter; D_6__uncultured bacterium	0	0	0	2	5	0	0	4	0	0	0	0	0	0	3	0	3	0	0	0	0	0	0	0	0	0	0	0	17	0	0	34
denovo1640	D_0__Bacteria; D_1__Tenericutes; D_2__Mollicutes; D_3__Mycoplasmatales; D_4__Mycoplasmataceae; D_5__Mycoplasma; D_6__uncultured bacterium	0	15	0	0	1	0	0	2	1	4	0	1	0	0	1	0	1	0	1	0	0	0	0	0	0	0	4	0	0	0	3	34
denovo1825	D_0__Bacteria; D_1__Tenericutes; D_2__Mollicutes; D_3__Mycoplasmatales; D_4__Mycoplasmataceae; D_5__Mycoplasma; D_6__uncultured bacterium	0	0	1	0	0	0	0	0	2	1	0	0	0	0	1	3	0	0	0	0	1	0	0	1	0	0	1	1	0	0	22	34
denovo3425	D_0__Bacteria; D_1__Tenericutes; D_2__Mollicutes; D_3__Mycoplasmatales; D_4__Mycoplasmataceae; D_5__Mycoplasma; D_6__uncultured bacterium	3	0	0	0	7	0	0	0	4	0	0	4	0	1	0	0	0	0	8	0	2	3	0	0	0	0	0	0	2	0	0	34
denovo5011	Unassigned	0	0	0	1	2	0	0	0	1	0	7	0	0	6	0	0	0	0	0	0	1	0	14	0	1	0	0	0	1	0	0	34
denovo6971	Unassigned	0	0	0	0	0	3	4	1	5	0	3	0	5	0	8	0	2	0	0	2	0	0	0	0	1	0	0	0	0	0	0	34
denovo4619	D_0__Bacteria; D_1__Tenericutes; D_2__Mollicutes; D_3__Mycoplasmatales; D_4__Mycoplasmataceae; D_5__Mycoplasma; D_6__uncultured bacterium	0	0	0	2	1	0	1	7	2	0	0	0	0	1	0	1	2	3	5	0	4	3	0	1	0	0	0	0	0	0	0	33
denovo6437	D_0__Bacteria; D_1__Tenericutes; D_2__Mollicutes; D_3__Mycoplasmatales; D_4__Mycoplasmataceae; D_5__Mycoplasma; D_6__uncultured bacterium	0	0	0	10	1	11	1	1	2	0	1	0	0	0	1	0	0	0	0	0	0	0	3	0	0	0	0	0	2	0	0	33
denovo6583	D_0__Bacteria; D_1__Tenericutes; D_2__Mollicutes; D_3__Mycoplasmatales; D_4__Mycoplasmataceae; D_5__Mycoplasma; D_6__uncultured bacterium	0	0	0	4	5	5	6	0	5	0	0	0	0	0	1	0	3	0	0	0	0	1	0	2	1	0	0	0	0	0	0	33
denovo3533	D_0__Bacteria; D_1__Tenericutes; D_2__Mollicutes; D_3__Mycoplasmatales; D_4__Mycoplasmataceae; D_5__Mycoplasma; D_6__uncultured bacterium	8	0	0	0	24	0	0	0	0	0	0	0	0	0	0	0	0	0	0	0	0	0	0	0	0	0	0	0	0	0	0	32
denovo1017	Unassigned	1	2	1	1	0	0	2	1	2	8	3	1	1	2	1	1	0	0	0	0	0	0	1	0	1	0	2	0	0	1	0	32
denovo1568	Unassigned	0	2	0	0	0	0	0	0	0	4	0	0	0	0	0	2	0	0	3	0	0	1	0	4	0	8	6	1	1	0	0	32
denovo1638	D_0__Bacteria; D_1__Tenericutes; D_2__Mollicutes; D_3__Mycoplasmatales; D_4__Mycoplasmataceae; D_5__Mycoplasma; D_6__uncultured bacterium	0	1	1	0	0	0	0	0	0	16	2	2	0	0	0	1	0	0	4	1	1	0	0	0	1	0	1	0	0	0	0	31
denovo283	D_0__Bacteria; D_1__Tenericutes; D_2__Mollicutes; D_3__Mycoplasmatales; D_4__Mycoplasmataceae; D_5__Mycoplasma; D_6__uncultured bacterium	0	2	0	2	0	3	3	1	0	1	4	0	0	1	2	1	0	0	0	0	0	0	0	2	1	1	4	0	0	0	3	31
denovo4450	D_0__Bacteria; D_1__Tenericutes; D_2__Mollicutes; D_3__Mycoplasmatales; D_4__Mycoplasmataceae; D_5__Mycoplasma; D_6__uncultured bacterium	0	0	0	1	4	0	0	2	0	0	0	7	0	0	1	0	0	0	11	0	1	0	1	1	0	0	0	0	1	0	0	30
denovo5332	D_0__Bacteria; D_1__Tenericutes; D_2__Mollicutes; D_3__Mycoplasmatales; D_4__Mycoplasmataceae; D_5__Mycoplasma; D_6__uncultured bacterium	1	0	0	1	3	4	4	3	1	0	3	0	1	1	2	0	2	0	0	2	0	1	0	1	0	0	0	0	0	0	0	30
denovo1720	D_0__Bacteria; D_1__Tenericutes; D_2__Mollicutes; D_3__Mycoplasmatales; D_4__Mycoplasmataceae; D_5__Mycoplasma; D_6__uncultured bacterium	0	5	0	0	0	0	0	0	0	5	2	0	0	0	2	11	0	0	0	0	0	0	0	0	0	0	1	0	0	1	2	29
denovo4609	D_0__Bacteria; D_1__Tenericutes; D_2__Mollicutes; D_3__Mycoplasmatales; D_4__Mycoplasmataceae; D_5__Mycoplasma; D_6__uncultured bacterium	0	0	0	0	1	1	0	0	0	0	2	0	0	0	0	0	0	0	10	3	6	1	4	0	0	0	0	0	1	0	0	29
denovo710	D_0__Bacteria; D_1__Tenericutes; D_2__Mollicutes; D_3__Mycoplasmatales; D_4__Mycoplasmataceae; D_5__Mycoplasma; D_6__uncultured bacterium	0	0	0	0	0	0	1	0	1	4	4	0	0	4	0	0	1	1	1	0	0	0	11	0	0	1	0	0	0	0	0	29
denovo1711	D_0__Bacteria; D_1__Tenericutes; D_2__Mollicutes; D_3__Mycoplasmatales; D_4__Mycoplasmataceae; D_5__Mycoplasma; D_6__uncultured bacterium	0	7	0	1	1	0	0	0	1	0	0	0	0	0	0	6	0	0	0	0	0	0	0	0	0	0	7	1	0	4	0	28
denovo3787	D_0__Bacteria; D_1__Tenericutes; D_2__Mollicutes; D_3__Mycoplasmatales; D_4__Mycoplasmataceae; D_5__Mycoplasma; D_6__uncultured bacterium	0	0	0	0	0	0	0	0	0	0	1	15	0	0	0	0	0	0	11	0	1	0	0	0	0	0	0	0	0	0	0	28
denovo6790	D_0__Bacteria; D_1__Tenericutes; D_2__Mollicutes; D_3__Mycoplasmatales; D_4__Mycoplasmataceae; D_5__Mycoplasma; D_6__uncultured bacterium	4	0	0	0	4	1	3	3	5	0	0	0	0	0	3	0	3	0	0	0	0	0	0	1	0	0	0	0	1	0	0	28
denovo6734	Unassigned	1	0	0	0	12	0	0	0	3	0	0	0	0	0	0	1	1	0	0	0	0	1	1	3	0	0	0	0	5	0	0	28
denovo7386	Unassigned	3	0	0	0	0	0	0	0	1	0	0	0	0	0	0	0	0	0	0	2	1	2	0	18	0	0	0	0	1	0	0	28
denovo1729	D_0__Bacteria; D_1__Tenericutes; D_2__Mollicutes; D_3__Mycoplasmatales; D_4__Mycoplasmataceae; D_5__Mycoplasma; D_6__uncultured bacterium	0	13	0	0	0	0	0	0	0	0	2	0	0	0	0	0	0	0	0	0	0	1	0	0	0	0	0	11	0	0	0	27
denovo6073	D_0__Bacteria; D_1__Tenericutes; D_2__Mollicutes; D_3__Mycoplasmatales; D_4__Mycoplasmataceae; D_5__Mycoplasma; D_6__uncultured bacterium	1	0	0	5	1	10	0	3	0	0	3	0	0	0	0	0	1	0	0	0	0	1	0	0	2	0	0	0	0	0	0	27
denovo2717	Unassigned	4	0	0	0	7	0	0	7	1	0	0	0	0	0	0	0	1	0	1	1	0	2	0	3	0	0	0	0	0	0	0	27
denovo87	D_0__Bacteria; D_1__Proteobacteria; D_2__Epsilonproteobacteria; D_3__Campylobacterales; D_4__Helicobacteraceae; D_5__uncultured; D_6__uncultured bacterium	0	1	0	0	0	0	1	0	1	0	0	2	0	0	1	0	0	0	0	4	0	0	11	1	0	3	1	0	0	0	0	26
denovo192	D_0__Bacteria; D_1__Tenericutes; D_2__Mollicutes; D_3__Mycoplasmatales; D_4__Mycoplasmataceae; D_5__Mycoplasma; D_6__uncultured bacterium	0	2	4	0	3	0	0	1	3	0	0	0	0	0	0	2	0	0	1	0	0	6	0	0	0	0	2	1	1	0	0	26
denovo1066	D_0__Bacteria; D_1__Tenericutes; D_2__Mollicutes; D_3__Mycoplasmatales; D_4__Mycoplasmataceae; D_5__Mycoplasma; D_6__uncultured bacterium	0	2	0	0	0	0	1	0	0	0	0	0	0	0	0	0	0	0	0	0	0	0	0	1	0	2	4	1	0	14	0	25
denovo5602	D_0__Bacteria; D_1__Tenericutes; D_2__Mollicutes; D_3__Mycoplasmatales; D_4__Mycoplasmataceae; D_5__Mycoplasma; D_6__uncultured bacterium	1	0	0	9	0	0	0	0	10	0	0	0	0	0	0	4	0	0	0	0	1	0	0	0	0	0	0	0	0	0	0	25
denovo6764	D_0__Bacteria; D_1__Tenericutes; D_2__Mollicutes; D_3__Mycoplasmatales; D_4__Mycoplasmataceae; D_5__Mycoplasma; D_6__uncultured bacterium	0	0	0	0	4	1	0	1	4	0	6	0	0	3	0	1	1	0	0	1	0	0	0	2	0	0	0	0	1	0	0	25
denovo1843	D_0__Bacteria; D_1__Tenericutes; D_2__Mollicutes; D_3__Mycoplasmatales; D_4__Mycoplasmataceae; D_5__Mycoplasma; D_6__uncultured bacterium	0	0	3	0	2	1	1	0	2	2	2	2	0	0	0	2	1	1	2	0	3	0	0	0	0	0	0	0	0	0	0	24
denovo3272	D_0__Bacteria; D_1__Tenericutes; D_2__Mollicutes; D_3__Mycoplasmatales; D_4__Mycoplasmataceae; D_5__Mycoplasma; D_6__uncultured bacterium	3	0	1	0	11	0	0	1	1	0	0	3	0	0	0	1	0	0	2	0	0	0	0	0	0	0	0	0	0	0	0	23
denovo5223	D_0__Bacteria; D_1__Tenericutes; D_2__Mollicutes; D_3__Mycoplasmatales; D_4__Mycoplasmataceae; D_5__Mycoplasma; D_6__uncultured bacterium	0	0	0	4	0	3	1	1	1	0	0	0	0	0	0	1	0	0	0	0	0	0	1	0	0	0	0	0	10	0	0	22
denovo5111	Unassigned	0	0	0	0	17	0	0	1	0	0	0	0	0	0	0	1	0	0	0	0	0	1	0	0	0	0	0	0	2	0	0	22
denovo1160	D_0__Bacteria; D_1__Tenericutes; D_2__Mollicutes; D_3__Mycoplasmatales; D_4__Mycoplasmataceae; D_5__Mycoplasma; D_6__uncultured bacterium	0	3	0	1	1	0	1	2	0	2	3	0	0	0	0	1	0	0	0	0	0	0	1	1	0	5	0	0	0	0	0	21
denovo2243	D_0__Bacteria; D_1__Tenericutes; D_2__Mollicutes; D_3__Mycoplasmatales; D_4__Mycoplasmataceae; D_5__Mycoplasma; D_6__uncultured bacterium	0	0	7	1	0	0	0	0	0	13	0	0	0	0	0	0	0	0	0	0	0	0	0	0	0	0	0	0	0	0	0	21
denovo681	D_0__Bacteria; D_1__Tenericutes; D_2__Mollicutes; D_3__Mycoplasmatales; D_4__Mycoplasmataceae; D_5__Mycoplasma; D_6__uncultured bacterium	0	3	0	2	1	0	0	0	0	0	0	0	0	0	0	1	1	0	0	0	1	0	1	0	1	0	1	0	7	1	1	21
denovo79	D_0__Bacteria; D_1__Tenericutes; D_2__Mollicutes; D_3__Mycoplasmatales; D_4__Mycoplasmataceae; D_5__Mycoplasma; D_6__uncultured bacterium	0	3	0	0	0	0	0	1	0	1	1	0	0	1	0	0	0	0	0	3	0	0	1	4	2	4	0	0	0	0	0	21
denovo121	D_0__Bacteria; D_1__Tenericutes; D_2__Mollicutes; D_3__Mycoplasmatales; D_4__Mycoplasmataceae; D_5__Mycoplasma; D_6__uncultured bacterium	0	18	0	0	0	0	0	0	0	0	0	0	0	0	0	0	0	1	0	0	0	0	0	0	0	0	0	1	0	0	0	20
denovo4616	D_0__Bacteria; D_1__Tenericutes; D_2__Mollicutes; D_3__Mycoplasmatales; D_4__Mycoplasmataceae; D_5__Mycoplasma; D_6__uncultured bacterium	1	0	0	0	5	0	1	0	1	0	1	0	0	0	0	1	1	2	4	0	1	1	1	0	0	0	0	0	0	0	0	20
denovo47	D_0__Bacteria; D_1__Tenericutes; D_2__Mollicutes; D_3__Mycoplasmatales; D_4__Mycoplasmataceae; D_5__Mycoplasma; D_6__uncultured bacterium	0	7	0	0	0	0	0	0	4	0	2	1	0	0	0	2	1	0	0	0	0	0	0	0	0	0	0	0	3	0	0	20
denovo5871	D_0__Bacteria; D_1__Tenericutes; D_2__Mollicutes; D_3__Mycoplasmatales; D_4__Mycoplasmataceae; D_5__Mycoplasma; D_6__uncultured bacterium	1	0	0	2	2	2	0	1	2	0	1	0	0	0	0	1	0	0	0	0	4	0	1	3	0	0	0	0	0	0	0	20
denovo1026	Unassigned	1	0	0	3	0	0	0	0	1	8	0	1	1	0	0	0	0	0	0	1	0	0	0	0	1	1	2	0	0	0	0	20
denovo29	Unassigned	0	2	0	0	0	0	0	0	2	0	0	0	0	0	0	0	1	0	7	0	0	0	0	0	0	0	7	0	1	0	0	20
denovo34	D_0__Bacteria; D_1__Proteobacteria; D_2__Gammaproteobacteria; D_3__Vibrionales; D_4__Vibrionaceae; D_5__Vibrio	0	0	0	0	0	0	0	0	0	0	0	0	0	0	0	0	0	0	0	0	0	0	17	0	0	1	1	0	0	0	0	19
denovo5	D_0__Bacteria; D_1__Proteobacteria; D_2__Gammaproteobacteria; D_3__Vibrionales; D_4__Vibrionaceae; D_5__Vibrio; Ambiguous_taxa	0	0	0	0	0	0	0	4	0	0	0	0	5	0	0	0	0	0	0	0	0	0	0	7	0	0	1	0	0	2	0	19
denovo3789	D_0__Bacteria; D_1__Tenericutes; D_2__Mollicutes; D_3__Mycoplasmatales; D_4__Mycoplasmataceae; D_5__Mycoplasma; D_6__uncultured bacterium	1	0	0	0	1	0	0	3	2	0	0	6	1	0	0	0	1	0	0	0	0	0	0	2	2	0	0	0	0	0	0	19
denovo4882	D_0__Bacteria; D_1__Tenericutes; D_2__Mollicutes; D_3__Mycoplasmatales; D_4__Mycoplasmataceae; D_5__Mycoplasma; D_6__uncultured bacterium	0	0	0	0	2	3	1	0	0	0	1	0	0	0	0	0	0	1	0	2	0	0	2	0	3	0	0	0	4	0	0	19
denovo841	D_0__Bacteria; D_1__Tenericutes; D_2__Mollicutes; D_3__Mycoplasmatales; D_4__Mycoplasmataceae; D_5__Mycoplasma; D_6__uncultured bacterium	0	4	2	0	0	0	0	0	3	2	0	0	0	0	0	3	0	0	0	0	0	1	0	0	0	3	0	0	0	1	0	19
denovo3453	Unassigned	2	0	0	0	5	0	0	4	2	0	0	0	0	1	0	1	0	0	1	0	0	0	0	2	0	0	0	0	1	0	0	19
denovo38	Unassigned	0	0	0	0	0	0	0	0	0	0	1	0	2	0	3	0	0	0	0	0	0	0	5	2	1	0	1	2	0	0	2	19
denovo5322	D_0__Bacteria; D_1__Fusobacteria; D_2__Fusobacteriia; D_3__Fusobacteriales; D_4__Fusobacteriaceae; D_5__Psychrilyobacter; D_6__uncultured bacterium	0	0	0	5	2	1	0	0	0	0	0	0	0	0	1	0	0	0	0	0	0	0	0	1	1	0	0	0	7	0	0	18
denovo1659	D_0__Bacteria; D_1__Tenericutes; D_2__Mollicutes; D_3__Mycoplasmatales; D_4__Mycoplasmataceae; D_5__Mycoplasma; D_6__uncultured bacterium	0	2	0	1	0	0	0	0	0	5	0	0	1	0	1	1	1	0	0	0	0	0	0	3	0	0	0	0	0	2	1	18
denovo2753	D_0__Bacteria; D_1__Tenericutes; D_2__Mollicutes; D_3__Mycoplasmatales; D_4__Mycoplasmataceae; D_5__Mycoplasma; D_6__uncultured bacterium	0	0	6	1	0	1	0	1	0	0	0	2	0	0	0	0	0	0	5	0	0	0	0	1	0	0	0	0	1	0	0	18
denovo5301	D_0__Bacteria; D_1__Tenericutes; D_2__Mollicutes; D_3__Mycoplasmatales; D_4__Mycoplasmataceae; D_5__Mycoplasma; D_6__uncultured bacterium	1	0	0	1	4	7	1	0	1	0	1	0	0	0	0	0	0	0	0	0	1	0	0	0	0	0	0	0	1	0	0	18
denovo2405	D_0__Bacteria; D_1__Tenericutes; D_2__Mollicutes; D_3__Mycoplasmatales; D_4__Mycoplasmataceae; D_5__Mycoplasma; D_6__uncultured bacterium	0	0	14	1	0	0	0	0	0	0	0	2	0	0	0	0	0	0	0	0	0	0	0	0	0	0	0	0	0	0	0	17
denovo84	D_0__Bacteria; D_1__Tenericutes; D_2__Mollicutes; D_3__Mycoplasmatales; D_4__Mycoplasmataceae; D_5__Mycoplasma; D_6__uncultured bacterium	1	1	0	3	0	0	0	0	1	0	3	0	0	0	0	2	0	0	0	0	0	0	0	0	2	1	3	0	0	0	0	17
denovo6722	D_0__Bacteria; D_1__Fusobacteria; D_2__Fusobacteriia; D_3__Fusobacteriales; D_4__Fusobacteriaceae; D_5__Psychrilyobacter; D_6__uncultured bacterium	1	0	0	0	2	0	0	3	0	0	0	0	0	0	2	0	2	0	0	1	3	0	0	0	0	0	0	0	2	0	0	16
denovo184	D_0__Bacteria; D_1__Tenericutes; D_2__Mollicutes; D_3__Mycoplasmatales; D_4__Mycoplasmataceae; D_5__Mycoplasma; D_6__uncultured bacterium	0	0	1	0	0	0	0	0	0	10	1	0	0	0	0	0	0	0	0	0	0	0	0	2	0	0	0	0	0	1	0	15
denovo133	D_0__Bacteria; D_1__Fusobacteria; D_2__Fusobacteriia; D_3__Fusobacteriales; D_4__Fusobacteriaceae; D_5__Propionigenium; Ambiguous_taxa	0	0	0	0	0	0	0	0	0	0	11	0	0	0	0	0	0	0	0	2	0	0	1	0	0	0	0	0	0	0	0	14
denovo4501	D_0__Bacteria; D_1__Tenericutes; D_2__Mollicutes; D_3__Mycoplasmatales; D_4__Mycoplasmataceae; D_5__Mycoplasma; D_6__uncultured bacterium	1	0	0	7	0	0	0	2	1	0	1	0	0	0	0	0	0	0	1	0	0	0	0	1	0	0	0	0	0	0	0	14
denovo3885	Unassigned	0	0	0	0	0	0	0	0	0	0	0	9	5	0	0	0	0	0	0	0	0	0	0	0	0	0	0	0	0	0	0	14
denovo5118	Unassigned	0	0	0	0	0	0	0	0	0	0	0	0	1	0	0	0	0	6	0	0	1	4	1	0	0	0	0	0	1	0	0	14
denovo629	Unassigned	0	0	0	0	0	0	0	0	1	6	3	0	0	1	0	0	0	0	1	0	0	0	1	0	0	0	0	0	1	0	0	14
denovo4918	D_0__Bacteria; D_1__Tenericutes; D_2__Mollicutes; D_3__Mycoplasmatales; D_4__Mycoplasmataceae; D_5__Mycoplasma; D_6__uncultured bacterium	3	0	0	0	5	0	0	1	1	0	0	0	0	1	0	0	0	0	0	1	1	0	0	0	0	0	0	0	0	0	0	13
denovo745	D_0__Bacteria; D_1__Tenericutes; D_2__Mollicutes; D_3__Mycoplasmatales; D_4__Mycoplasmataceae; D_5__Mycoplasma; D_6__uncultured bacterium	0	2	0	0	0	0	0	1	0	3	0	0	0	0	0	0	0	0	1	0	0	0	0	0	0	0	4	0	0	2	0	13
denovo3308	Unassigned	0	0	0	0	7	0	0	2	1	0	0	0	0	0	0	0	2	0	0	0	0	0	0	1	0	0	0	0	0	0	0	13
denovo333	Unassigned	0	4	0	0	0	0	0	0	0	0	0	2	2	0	0	0	0	2	1	0	1	0	0	0	0	0	0	0	0	1	0	13
denovo41	D_0__Bacteria; D_1__Proteobacteria; D_2__Gammaproteobacteria; D_3__Vibrionales; D_4__Vibrionaceae; D_5__Vibrio; Ambiguous_taxa	0	0	0	0	0	0	0	0	1	0	0	0	3	0	0	0	4	0	0	4	0	0	0	0	0	0	0	0	0	0	0	12
denovo2615	D_0__Bacteria; D_1__Tenericutes; D_2__Mollicutes; D_3__Mycoplasmatales; D_4__Mycoplasmataceae; D_5__Mycoplasma; D_6__uncultured bacterium	0	0	1	0	1	0	0	1	0	0	1	1	0	0	0	1	0	0	2	1	0	0	0	0	0	0	0	0	3	0	0	12
denovo2637	D_0__Bacteria; D_1__Tenericutes; D_2__Mollicutes; D_3__Mycoplasmatales; D_4__Mycoplasmataceae; D_5__Mycoplasma; D_6__uncultured bacterium	1	0	3	0	6	0	0	1	0	0	0	1	0	0	0	0	0	0	0	0	0	0	0	0	0	0	0	0	0	0	0	12
denovo2867	D_0__Bacteria; D_1__Proteobacteria; D_2__Gammaproteobacteria; D_3__Vibrionales; D_4__Vibrionaceae; D_5__Vibrio	0	0	0	0	0	0	0	0	0	0	0	0	0	0	0	0	10	0	0	0	0	0	1	0	0	0	0	0	0	0	0	11
denovo1757	D_0__Bacteria; D_1__Tenericutes; D_2__Mollicutes; D_3__Mycoplasmatales; D_4__Mycoplasmataceae; D_5__Mycoplasma; D_6__uncultured bacterium	0	1	1	0	0	0	0	0	0	0	0	0	0	0	0	4	0	0	0	0	0	0	0	0	0	0	2	0	0	2	0	10
denovo2699	D_0__Bacteria; D_1__Tenericutes; D_2__Mollicutes; D_3__Mycoplasmatales; D_4__Mycoplasmataceae; D_5__Mycoplasma; D_6__uncultured bacterium	0	0	1	0	0	0	0	0	0	0	0	0	0	0	0	0	2	1	4	0	0	2	0	0	0	0	0	0	0	0	0	10
denovo3016	D_0__Bacteria; D_1__Tenericutes; D_2__Mollicutes; D_3__Mycoplasmatales; D_4__Mycoplasmataceae; D_5__Mycoplasma; D_6__uncultured bacterium	0	0	5	1	0	0	0	0	1	0	0	3	0	0	0	0	0	0	0	0	0	0	0	0	0	0	0	0	0	0	0	10
denovo4119	D_0__Bacteria; D_1__Tenericutes; D_2__Mollicutes; D_3__Mycoplasmatales; D_4__Mycoplasmataceae; D_5__Mycoplasma; D_6__uncultured bacterium	0	0	0	0	0	0	0	0	0	0	1	4	0	0	0	0	0	1	4	0	0	0	0	0	0	0	0	0	0	0	0	10
denovo2885	D_0__Bacteria; D_1__Fusobacteria; D_2__Fusobacteriia; D_3__Fusobacteriales; D_4__Fusobacteriaceae; D_5__Psychrilyobacter; D_6__uncultured bacterium	0	0	3	0	0	0	0	0	0	0	0	0	0	0	0	0	0	0	6	0	0	0	0	0	0	0	0	0	0	0	0	9
denovo2634	D_0__Bacteria; D_1__Tenericutes; D_2__Mollicutes; D_3__Mycoplasmatales; D_4__Mycoplasmataceae; D_5__Mycoplasma; D_6__uncultured bacterium	0	0	2	1	0	0	0	0	0	0	0	0	0	0	0	0	0	0	3	0	1	0	0	1	0	0	0	0	1	0	0	9
denovo5178	D_0__Bacteria; D_1__Tenericutes; D_2__Mollicutes; D_3__Mycoplasmatales; D_4__Mycoplasmataceae; D_5__Mycoplasma; D_6__uncultured bacterium	0	0	0	3	2	0	0	1	1	0	0	0	1	0	0	0	0	0	0	0	0	0	0	0	1	0	0	0	0	0	0	9
denovo1246	Unassigned	0	8	0	0	0	0	0	0	0	0	0	0	0	0	0	0	0	1	0	0	0	0	0	0	0	0	0	0	0	0	0	9
denovo3470	Unassigned	1	0	0	0	3	0	0	0	0	0	0	0	0	0	0	2	0	0	0	0	0	1	0	0	1	0	0	0	1	0	0	9
denovo2573	D_0__Bacteria; D_1__Tenericutes; D_2__Mollicutes; D_3__Mycoplasmatales; D_4__Mycoplasmataceae; D_5__Mycoplasma; D_6__uncultured bacterium	0	0	8	0	0	0	0	0	0	0	0	0	0	0	0	0	0	0	0	0	0	0	0	0	0	0	0	0	0	0	0	8
denovo3915	D_0__Bacteria; D_1__Fusobacteria; D_2__Fusobacteriia; D_3__Fusobacteriales; D_4__Fusobacteriaceae; D_5__Psychrilyobacter; D_6__uncultured bacterium	0	0	0	0	2	0	0	0	0	0	0	0	0	0	0	0	0	0	2	0	0	0	0	0	1	0	0	0	2	0	0	7
denovo2936	D_0__Bacteria; D_1__Tenericutes; D_2__Mollicutes; D_3__Mycoplasmatales; D_4__Mycoplasmataceae; D_5__Mycoplasma; D_6__uncultured bacterium	0	0	0	0	0	0	0	1	0	0	0	0	1	0	0	1	0	0	2	0	0	1	1	0	0	0	0	0	0	0	0	7
denovo3641	D_0__Bacteria; D_1__Tenericutes; D_2__Mollicutes; D_3__Mycoplasmatales; D_4__Mycoplasmataceae; D_5__Mycoplasma; D_6__uncultured bacterium	0	0	0	0	0	0	0	0	1	0	0	6	0	0	0	0	0	0	0	0	0	0	0	0	0	0	0	0	0	0	0	7
denovo4156	D_0__Bacteria; D_1__Tenericutes; D_2__Mollicutes; D_3__Mycoplasmatales; D_4__Mycoplasmataceae; D_5__Mycoplasma; D_6__uncultured bacterium	0	0	0	0	0	0	0	0	0	0	0	0	0	0	0	0	1	1	5	0	0	0	0	0	0	0	0	0	0	0	0	7
denovo1228	Unassigned	0	0	0	0	0	0	0	0	0	0	0	2	0	0	0	0	0	1	1	0	2	0	1	0	0	0	0	0	0	0	0	7
denovo732	D_0__Bacteria; D_1__Proteobacteria; D_2__Alphaproteobacteria; D_3__Rickettsiales; D_4__Anaplasmataceae; D_5__Candidatus Xenohaliotis; D_6__Candidatus Xenohaliotis californiensis	0	0	0	0	0	0	2	0	0	0	1	0	1	0	0	0	0	0	0	0	0	0	1	0	0	1	0	0	0	0	0	6
denovo57	D_0__Bacteria; D_1__Spirochaetae; D_2__Spirochaetes; D_3__Spirochaetales; D_4__Spirochaetaceae; D_5__uncultured; D_6__uncultured Spirochaetes bacterium	0	0	0	0	0	0	0	0	0	2	0	0	4	0	0	0	0	0	0	0	0	0	0	0	0	0	0	0	0	0	0	6
denovo1294	D_0__Bacteria; D_1__Tenericutes; D_2__Mollicutes; D_3__Mycoplasmatales; D_4__Mycoplasmataceae; D_5__Mycoplasma; D_6__uncultured bacterium	0	4	0	0	0	0	0	0	0	0	0	0	0	0	0	1	0	0	0	0	0	1	0	0	0	0	0	0	0	0	0	6
denovo2951	D_0__Bacteria; D_1__Tenericutes; D_2__Mollicutes; D_3__Mycoplasmatales; D_4__Mycoplasmataceae; D_5__Mycoplasma; D_6__uncultured bacterium	0	0	1	0	2	0	0	1	0	0	0	0	0	0	1	0	0	0	0	1	0	0	0	0	0	0	0	0	0	0	0	6
denovo3996	D_0__Bacteria; D_1__Tenericutes; D_2__Mollicutes; D_3__Mycoplasmatales; D_4__Mycoplasmataceae; D_5__Mycoplasma; D_6__uncultured bacterium	0	0	0	0	0	0	0	0	0	0	0	0	0	0	0	0	0	0	4	0	0	2	0	0	0	0	0	0	0	0	0	6
denovo4891	D_0__Bacteria; D_1__Tenericutes; D_2__Mollicutes; D_3__Mycoplasmatales; D_4__Mycoplasmataceae; D_5__Mycoplasma; D_6__uncultured bacterium	0	0	0	1	0	0	0	1	1	0	0	0	0	0	0	0	0	0	0	0	1	0	0	0	2	0	0	0	0	0	0	6
denovo5277	D_0__Bacteria; D_1__Tenericutes; D_2__Mollicutes; D_3__Mycoplasmatales; D_4__Mycoplasmataceae; D_5__Mycoplasma; D_6__uncultured bacterium	0	0	0	0	0	0	0	0	0	0	0	0	0	1	0	0	2	2	0	0	0	1	0	0	0	0	0	0	0	0	0	6
denovo5319	D_0__Bacteria; D_1__Tenericutes; D_2__Mollicutes; D_3__Mycoplasmatales; D_4__Mycoplasmataceae; D_5__Mycoplasma; D_6__uncultured bacterium	1	0	0	0	4	0	0	0	1	0	0	0	0	0	0	0	0	0	0	0	0	0	0	0	0	0	0	0	0	0	0	6
denovo5379	D_0__Bacteria; D_1__Tenericutes; D_2__Mollicutes; D_3__Mycoplasmatales; D_4__Mycoplasmataceae; D_5__Mycoplasma; D_6__uncultured bacterium	0	0	0	0	2	0	0	0	2	0	0	0	0	0	0	0	0	0	0	1	1	0	0	0	0	0	0	0	0	0	0	6
denovo936	D_0__Bacteria; D_1__Fusobacteria; D_2__Fusobacteriia; D_3__Fusobacteriales; D_4__Fusobacteriaceae; D_5__Psychrilyobacter; D_6__uncultured bacterium	0	0	0	0	0	0	0	0	0	0	0	0	0	0	0	0	0	0	3	0	0	0	0	0	0	1	0	0	0	1	0	5
denovo255	D_0__Bacteria; D_1__Tenericutes; D_2__Mollicutes; D_3__Mycoplasmatales; D_4__Mycoplasmataceae; D_5__Mycoplasma; D_6__uncultured bacterium	0	1	0	0	0	0	0	0	0	1	3	0	0	0	0	0	0	0	0	0	0	0	0	0	0	0	0	0	0	0	0	5
denovo2632	D_0__Bacteria; D_1__Tenericutes; D_2__Mollicutes; D_3__Mycoplasmatales; D_4__Mycoplasmataceae; D_5__Mycoplasma; D_6__uncultured bacterium	0	0	2	0	2	0	0	0	1	0	0	0	0	0	0	0	0	0	0	0	0	0	0	0	0	0	0	0	0	0	0	5
denovo3432	D_0__Bacteria; D_1__Tenericutes; D_2__Mollicutes; D_3__Mycoplasmatales; D_4__Mycoplasmataceae; D_5__Mycoplasma; D_6__uncultured bacterium	0	0	0	0	1	0	0	0	0	0	0	1	0	0	0	0	0	0	1	0	1	0	0	0	0	0	0	0	1	0	0	5
denovo3573	D_0__Bacteria; D_1__Tenericutes; D_2__Mollicutes; D_3__Mycoplasmatales; D_4__Mycoplasmataceae; D_5__Mycoplasma; D_6__uncultured bacterium	1	0	0	3	0	0	0	0	0	0	0	1	0	0	0	0	0	0	0	0	0	0	0	0	0	0	0	0	0	0	0	5
denovo3643	D_0__Bacteria; D_1__Tenericutes; D_2__Mollicutes; D_3__Mycoplasmatales; D_4__Mycoplasmataceae; D_5__Mycoplasma; D_6__uncultured bacterium	0	0	0	1	0	0	0	0	0	0	1	1	1	0	1	0	0	0	0	0	0	0	0	0	0	0	0	0	0	0	0	5
denovo2503	Unassigned	0	0	0	0	2	0	0	0	0	2	0	0	0	0	0	0	0	0	0	0	0	1	0	0	0	0	0	0	0	0	0	5
denovo4052	Unassigned	0	0	0	0	1	0	0	0	0	0	0	0	0	0	0	0	0	0	4	0	0	0	0	0	0	0	0	0	0	0	0	5
denovo217	D_0__Bacteria; D_1__Tenericutes; D_2__Mollicutes; D_3__Mycoplasmatales; D_4__Mycoplasmataceae; D_5__Mycoplasma; D_6__uncultured bacterium	0	0	0	0	0	0	0	0	2	0	0	0	0	0	0	2	0	0	0	0	0	0	0	0	0	0	0	0	0	0	0	4
denovo2941	D_0__Bacteria; D_1__Tenericutes; D_2__Mollicutes; D_3__Mycoplasmatales; D_4__Mycoplasmataceae; D_5__Mycoplasma; D_6__uncultured bacterium	0	0	0	1	0	0	0	1	0	0	0	0	0	0	0	1	0	0	0	1	0	0	0	0	0	0	0	0	0	0	0	4
denovo120	D_0__Bacteria; D_1__Tenericutes; D_2__Mollicutes; D_3__Mycoplasmatales; D_4__Mycoplasmataceae; D_5__Mycoplasma; D_6__uncultured bacterium	1	0	1	0	0	0	0	0	0	0	0	0	0	0	0	0	0	0	0	0	0	0	0	0	0	0	0	0	0	1	0	3
denovo2895	D_0__Bacteria; D_1__Tenericutes; D_2__Mollicutes; D_3__Mycoplasmatales; D_4__Mycoplasmataceae; D_5__Mycoplasma; D_6__uncultured bacterium	0	0	1	0	0	0	0	1	0	0	0	0	0	0	1	0	0	0	0	0	0	0	0	0	0	0	0	0	0	0	0	3
denovo3436	D_0__Bacteria; D_1__Tenericutes; D_2__Mollicutes; D_3__Mycoplasmatales; D_4__Mycoplasmataceae; D_5__Mycoplasma; D_6__uncultured bacterium	0	0	0	0	1	0	0	0	1	0	0	0	0	0	0	0	0	0	0	0	0	0	0	1	0	0	0	0	0	0	0	3
denovo3475	D_0__Bacteria; D_1__Tenericutes; D_2__Mollicutes; D_3__Mycoplasmatales; D_4__Mycoplasmataceae; D_5__Mycoplasma; D_6__uncultured bacterium	0	0	0	1	1	0	0	1	0	0	0	0	0	0	0	0	0	0	0	0	0	0	0	0	0	0	0	0	0	0	0	3
denovo3552	D_0__Bacteria; D_1__Tenericutes; D_2__Mollicutes; D_3__Mycoplasmatales; D_4__Mycoplasmataceae; D_5__Mycoplasma; D_6__uncultured bacterium	0	0	0	0	0	0	0	1	0	0	0	0	0	0	0	0	0	0	0	0	0	0	0	0	2	0	0	0	0	0	0	3
denovo5507	D_0__Bacteria; D_1__Tenericutes; D_2__Mollicutes; D_3__Mycoplasmatales; D_4__Mycoplasmataceae; D_5__Mycoplasma; D_6__uncultured bacterium	0	0	0	0	0	0	0	1	0	0	0	0	0	0	0	0	0	0	0	0	0	1	0	0	0	0	0	0	1	0	0	3
denovo3485	Unassigned	1	0	0	0	1	0	0	0	1	0	0	0	0	0	0	0	0	0	0	0	0	0	0	0	0	0	0	0	0	0	0	3
denovo118	D_0__Bacteria; D_1__Tenericutes; D_2__Mollicutes; D_3__Mycoplasmatales; D_4__Mycoplasmataceae; D_5__Mycoplasma; D_6__uncultured bacterium	0	1	0	0	0	0	0	0	1	0	0	0	0	0	0	0	0	0	0	0	0	0	0	0	0	0	0	0	0	0	0	2
denovo2919	D_0__Bacteria; D_1__Tenericutes; D_2__Mollicutes; D_3__Mycoplasmatales; D_4__Mycoplasmataceae; D_5__Mycoplasma; D_6__uncultured bacterium	0	0	0	0	0	0	0	0	1	0	0	0	0	0	0	0	0	0	0	0	0	0	0	1	0	0	0	0	0	0	0	2
denovo3722	D_0__Bacteria; D_1__Tenericutes; D_2__Mollicutes; D_3__Mycoplasmatales; D_4__Mycoplasmataceae; D_5__Mycoplasma; D_6__uncultured bacterium	0	0	0	0	1	0	0	0	0	0	0	1	0	0	0	0	0	0	0	0	0	0	0	0	0	0	0	0	0	0	0	2
denovo4838	D_0__Bacteria; D_1__Tenericutes; D_2__Mollicutes; D_3__Mycoplasmatales; D_4__Mycoplasmataceae; D_5__Mycoplasma; D_6__uncultured bacterium	0	0	0	0	0	0	0	0	1	0	0	0	0	0	0	1	0	0	0	0	0	0	0	0	0	0	0	0	0	0	0	2
denovo5390	D_0__Bacteria; D_1__Tenericutes; D_2__Mollicutes; D_3__Mycoplasmatales; D_4__Mycoplasmataceae; D_5__Mycoplasma; D_6__uncultured bacterium	0	0	0	1	0	0	0	0	1	0	0	0	0	0	0	0	0	0	0	0	0	0	0	0	0	0	0	0	0	0	0	2
denovo67	D_0__Bacteria; D_1__Tenericutes; D_2__Mollicutes; D_3__Mycoplasmatales; D_4__Mycoplasmataceae; D_5__Mycoplasma; D_6__uncultured bacterium	0	0	0	0	0	0	0	0	0	0	0	0	0	0	0	2	0	0	0	0	0	0	0	0	0	0	0	0	0	0	0	2
denovo72	D_0__Bacteria; D_1__Tenericutes; D_2__Mollicutes; D_3__Mycoplasmatales; D_4__Mycoplasmataceae; D_5__Mycoplasma; D_6__uncultured bacterium	0	0	0	0	0	0	2	0	0	0	0	0	0	0	0	0	0	0	0	0	0	0	0	0	0	0	0	0	0	0	0	2
denovo2929	Unassigned	0	0	0	0	0	0	0	0	1	0	0	0	0	0	0	0	1	0	0	0	0	0	0	0	0	0	0	0	0	0	0	2
denovo3876	Unassigned	0	0	0	0	0	0	0	0	0	0	0	0	0	0	0	0	0	1	1	0	0	0	0	0	0	0	0	0	0	0	0	2
denovo24	D_0__Bacteria; D_1__Proteobacteria; D_2__Gammaproteobacteria; D_3__Vibrionales; D_4__Vibrionaceae; D_5__Vibrio	0	0	0	0	0	0	0	0	0	0	0	0	0	0	0	0	0	0	0	0	0	0	1	0	0	0	0	0	0	0	0	1
denovo156	D_0__Bacteria; D_1__Tenericutes; D_2__Mollicutes; D_3__Mycoplasmatales; D_4__Mycoplasmataceae; D_5__Mycoplasma; D_6__uncultured bacterium	0	0	0	0	0	0	0	0	0	0	0	0	0	0	0	1	0	0	0	0	0	0	0	0	0	0	0	0	0	0	0	1
denovo2570	D_0__Bacteria; D_1__Tenericutes; D_2__Mollicutes; D_3__Mycoplasmatales; D_4__Mycoplasmataceae; D_5__Mycoplasma; D_6__uncultured bacterium	0	0	1	0	0	0	0	0	0	0	0	0	0	0	0	0	0	0	0	0	0	0	0	0	0	0	0	0	0	0	0	1
denovo258	D_0__Bacteria; D_1__Tenericutes; D_2__Mollicutes; D_3__Mycoplasmatales; D_4__Mycoplasmataceae; D_5__Mycoplasma; D_6__uncultured bacterium	0	0	0	0	0	0	0	0	0	0	0	0	0	0	0	0	0	0	0	0	0	0	0	0	0	0	1	0	0	0	0	1
denovo2603	D_0__Bacteria; D_1__Tenericutes; D_2__Mollicutes; D_3__Mycoplasmatales; D_4__Mycoplasmataceae; D_5__Mycoplasma; D_6__uncultured bacterium	0	0	0	0	0	0	0	0	0	0	0	0	0	0	0	0	0	0	0	0	0	0	0	0	0	0	0	0	1	0	0	1
denovo2788	D_0__Bacteria; D_1__Tenericutes; D_2__Mollicutes; D_3__Mycoplasmatales; D_4__Mycoplasmataceae; D_5__Mycoplasma; D_6__uncultured bacterium	0	0	0	0	0	0	0	0	1	0	0	0	0	0	0	0	0	0	0	0	0	0	0	0	0	0	0	0	0	0	0	1
denovo2862	D_0__Bacteria; D_1__Tenericutes; D_2__Mollicutes; D_3__Mycoplasmatales; D_4__Mycoplasmataceae; D_5__Mycoplasma; D_6__uncultured bacterium	0	0	1	0	0	0	0	0	0	0	0	0	0	0	0	0	0	0	0	0	0	0	0	0	0	0	0	0	0	0	0	1
denovo2932	D_0__Bacteria; D_1__Tenericutes; D_2__Mollicutes; D_3__Mycoplasmatales; D_4__Mycoplasmataceae; D_5__Mycoplasma; D_6__uncultured bacterium	0	0	0	1	0	0	0	0	0	0	0	0	0	0	0	0	0	0	0	0	0	0	0	0	0	0	0	0	0	0	0	1
denovo3521	D_0__Bacteria; D_1__Tenericutes; D_2__Mollicutes; D_3__Mycoplasmatales; D_4__Mycoplasmataceae; D_5__Mycoplasma; D_6__uncultured bacterium	0	0	0	0	0	0	0	0	1	0	0	0	0	0	0	0	0	0	0	0	0	0	0	0	0	0	0	0	0	0	0	1
denovo3716	D_0__Bacteria; D_1__Tenericutes; D_2__Mollicutes; D_3__Mycoplasmatales; D_4__Mycoplasmataceae; D_5__Mycoplasma; D_6__uncultured bacterium	0	0	0	0	0	0	0	0	0	0	0	0	0	0	0	0	0	0	0	0	0	0	1	0	0	0	0	0	0	0	0	1
denovo4234	D_0__Bacteria; D_1__Tenericutes; D_2__Mollicutes; D_3__Mycoplasmatales; D_4__Mycoplasmataceae; D_5__Mycoplasma; D_6__uncultured bacterium	0	0	0	0	0	0	0	0	0	0	0	1	0	0	0	0	0	0	0	0	0	0	0	0	0	0	0	0	0	0	0	1
denovo4397	D_0__Bacteria; D_1__Tenericutes; D_2__Mollicutes; D_3__Mycoplasmatales; D_4__Mycoplasmataceae; D_5__Mycoplasma; D_6__uncultured bacterium	0	0	0	0	0	0	0	0	0	0	0	0	0	0	0	0	0	0	1	0	0	0	0	0	0	0	0	0	0	0	0	1
denovo44	D_0__Bacteria; D_1__Tenericutes; D_2__Mollicutes; D_3__Mycoplasmatales; D_4__Mycoplasmataceae; D_5__Mycoplasma; D_6__uncultured bacterium	0	0	0	0	0	0	0	0	0	0	1	0	0	0	0	0	0	0	0	0	0	0	0	0	0	0	0	0	0	0	0	1
denovo5130	D_0__Bacteria; D_1__Tenericutes; D_2__Mollicutes; D_3__Mycoplasmatales; D_4__Mycoplasmataceae; D_5__Mycoplasma; D_6__uncultured bacterium	0	0	0	0	1	0	0	0	0	0	0	0	0	0	0	0	0	0	0	0	0	0	0	0	0	0	0	0	0	0	0	1
denovo1217	Unassigned	0	1	0	0	0	0	0	0	0	0	0	0	0	0	0	0	0	0	0	0	0	0	0	0	0	0	0	0	0	0	0	1
denovo2627	Unassigned	0	0	0	0	0	0	0	0	0	0	0	1	0	0	0	0	0	0	0	0	0	0	0	0	0	0	0	0	0	0	0	1
denovo1303	D_0__Bacteria; D_1__Tenericutes; D_2__Mollicutes; D_3__Mycoplasmatales; D_4__Mycoplasmataceae; D_5__Mycoplasma; D_6__uncultured bacterium	0	0	0	0	0	0	0	0	0	0	0	0	0	0	0	0	0	0	0	0	0	0	0	0	0	0	0	0	0	0	0	0
denovo1319	D_0__Bacteria; D_1__Tenericutes; D_2__Mollicutes; D_3__Mycoplasmatales; D_4__Mycoplasmataceae; D_5__Mycoplasma; D_6__uncultured bacterium	0	0	0	0	0	0	0	0	0	0	0	0	0	0	0	0	0	0	0	0	0	0	0	0	0	0	0	0	0	0	0	0
denovo2602	D_0__Bacteria; D_1__Tenericutes; D_2__Mollicutes; D_3__Mycoplasmatales; D_4__Mycoplasmataceae; D_5__Mycoplasma; D_6__uncultured bacterium	0	0	0	0	0	0	0	0	0	0	0	0	0	0	0	0	0	0	0	0	0	0	0	0	0	0	0	0	0	0	0	0
denovo2623	D_0__Bacteria; D_1__Tenericutes; D_2__Mollicutes; D_3__Mycoplasmatales; D_4__Mycoplasmataceae; D_5__Mycoplasma; D_6__uncultured bacterium	0	0	0	0	0	0	0	0	0	0	0	0	0	0	0	0	0	0	0	0	0	0	0	0	0	0	0	0	0	0	0	0
denovo2792	D_0__Bacteria; D_1__Tenericutes; D_2__Mollicutes; D_3__Mycoplasmatales; D_4__Mycoplasmataceae; D_5__Mycoplasma; D_6__uncultured bacterium	0	0	0	0	0	0	0	0	0	0	0	0	0	0	0	0	0	0	0	0	0	0	0	0	0	0	0	0	0	0	0	0
denovo2811	D_0__Bacteria; D_1__Tenericutes; D_2__Mollicutes; D_3__Mycoplasmatales; D_4__Mycoplasmataceae; D_5__Mycoplasma; D_6__uncultured bacterium	0	0	0	0	0	0	0	0	0	0	0	0	0	0	0	0	0	0	0	0	0	0	0	0	0	0	0	0	0	0	0	0
denovo2845	D_0__Bacteria; D_1__Tenericutes; D_2__Mollicutes; D_3__Mycoplasmatales; D_4__Mycoplasmataceae; D_5__Mycoplasma; D_6__uncultured bacterium	0	0	0	0	0	0	0	0	0	0	0	0	0	0	0	0	0	0	0	0	0	0	0	0	0	0	0	0	0	0	0	0
denovo2865	D_0__Bacteria; D_1__Tenericutes; D_2__Mollicutes; D_3__Mycoplasmatales; D_4__Mycoplasmataceae; D_5__Mycoplasma; D_6__uncultured bacterium	0	0	0	0	0	0	0	0	0	0	0	0	0	0	0	0	0	0	0	0	0	0	0	0	0	0	0	0	0	0	0	0
denovo2937	D_0__Bacteria; D_1__Tenericutes; D_2__Mollicutes; D_3__Mycoplasmatales; D_4__Mycoplasmataceae; D_5__Mycoplasma; D_6__uncultured bacterium	0	0	0	0	0	0	0	0	0	0	0	0	0	0	0	0	0	0	0	0	0	0	0	0	0	0	0	0	0	0	0	0
denovo2942	D_0__Bacteria; D_1__Tenericutes; D_2__Mollicutes; D_3__Mycoplasmatales; D_4__Mycoplasmataceae; D_5__Mycoplasma; D_6__uncultured bacterium	0	0	0	0	0	0	0	0	0	0	0	0	0	0	0	0	0	0	0	0	0	0	0	0	0	0	0	0	0	0	0	0
denovo2946	D_0__Bacteria; D_1__Tenericutes; D_2__Mollicutes; D_3__Mycoplasmatales; D_4__Mycoplasmataceae; D_5__Mycoplasma; D_6__uncultured bacterium	0	0	0	0	0	0	0	0	0	0	0	0	0	0	0	0	0	0	0	0	0	0	0	0	0	0	0	0	0	0	0	0
denovo2953	D_0__Bacteria; D_1__Tenericutes; D_2__Mollicutes; D_3__Mycoplasmatales; D_4__Mycoplasmataceae; D_5__Mycoplasma; D_6__uncultured bacterium	0	0	0	0	0	0	0	0	0	0	0	0	0	0	0	0	0	0	0	0	0	0	0	0	0	0	0	0	0	0	0	0
denovo2964	D_0__Bacteria; D_1__Tenericutes; D_2__Mollicutes; D_3__Mycoplasmatales; D_4__Mycoplasmataceae; D_5__Mycoplasma; D_6__uncultured bacterium	0	0	0	0	0	0	0	0	0	0	0	0	0	0	0	0	0	0	0	0	0	0	0	0	0	0	0	0	0	0	0	0
denovo3351	D_0__Bacteria; D_1__Tenericutes; D_2__Mollicutes; D_3__Mycoplasmatales; D_4__Mycoplasmataceae; D_5__Mycoplasma; D_6__uncultured bacterium	0	0	0	0	0	0	0	0	0	0	0	0	0	0	0	0	0	0	0	0	0	0	0	0	0	0	0	0	0	0	0	0
denovo3433	D_0__Bacteria; D_1__Tenericutes; D_2__Mollicutes; D_3__Mycoplasmatales; D_4__Mycoplasmataceae; D_5__Mycoplasma; D_6__uncultured bacterium	0	0	0	0	0	0	0	0	0	0	0	0	0	0	0	0	0	0	0	0	0	0	0	0	0	0	0	0	0	0	0	0
denovo3550	D_0__Bacteria; D_1__Tenericutes; D_2__Mollicutes; D_3__Mycoplasmatales; D_4__Mycoplasmataceae; D_5__Mycoplasma; D_6__uncultured bacterium	0	0	0	0	0	0	0	0	0	0	0	0	0	0	0	0	0	0	0	0	0	0	0	0	0	0	0	0	0	0	0	0
denovo3555	D_0__Bacteria; D_1__Tenericutes; D_2__Mollicutes; D_3__Mycoplasmatales; D_4__Mycoplasmataceae; D_5__Mycoplasma; D_6__uncultured bacterium	0	0	0	0	0	0	0	0	0	0	0	0	0	0	0	0	0	0	0	0	0	0	0	0	0	0	0	0	0	0	0	0
denovo3617	D_0__Bacteria; D_1__Tenericutes; D_2__Mollicutes; D_3__Mycoplasmatales; D_4__Mycoplasmataceae; D_5__Mycoplasma; D_6__uncultured bacterium	0	0	0	0	0	0	0	0	0	0	0	0	0	0	0	0	0	0	0	0	0	0	0	0	0	0	0	0	0	0	0	0
denovo3618	D_0__Bacteria; D_1__Tenericutes; D_2__Mollicutes; D_3__Mycoplasmatales; D_4__Mycoplasmataceae; D_5__Mycoplasma; D_6__uncultured bacterium	0	0	0	0	0	0	0	0	0	0	0	0	0	0	0	0	0	0	0	0	0	0	0	0	0	0	0	0	0	0	0	0
denovo3628	D_0__Bacteria; D_1__Tenericutes; D_2__Mollicutes; D_3__Mycoplasmatales; D_4__Mycoplasmataceae; D_5__Mycoplasma; D_6__uncultured bacterium	0	0	0	0	0	0	0	0	0	0	0	0	0	0	0	0	0	0	0	0	0	0	0	0	0	0	0	0	0	0	0	0
denovo3663	D_0__Bacteria; D_1__Tenericutes; D_2__Mollicutes; D_3__Mycoplasmatales; D_4__Mycoplasmataceae; D_5__Mycoplasma; D_6__uncultured bacterium	0	0	0	0	0	0	0	0	0	0	0	0	0	0	0	0	0	0	0	0	0	0	0	0	0	0	0	0	0	0	0	0
denovo3691	D_0__Bacteria; D_1__Tenericutes; D_2__Mollicutes; D_3__Mycoplasmatales; D_4__Mycoplasmataceae; D_5__Mycoplasma; D_6__uncultured bacterium	0	0	0	0	0	0	0	0	0	0	0	0	0	0	0	0	0	0	0	0	0	0	0	0	0	0	0	0	0	0	0	0
denovo3692	D_0__Bacteria; D_1__Tenericutes; D_2__Mollicutes; D_3__Mycoplasmatales; D_4__Mycoplasmataceae; D_5__Mycoplasma; D_6__uncultured bacterium	0	0	0	0	0	0	0	0	0	0	0	0	0	0	0	0	0	0	0	0	0	0	0	0	0	0	0	0	0	0	0	0
denovo3849	D_0__Bacteria; D_1__Tenericutes; D_2__Mollicutes; D_3__Mycoplasmatales; D_4__Mycoplasmataceae; D_5__Mycoplasma; D_6__uncultured bacterium	0	0	0	0	0	0	0	0	0	0	0	0	0	0	0	0	0	0	0	0	0	0	0	0	0	0	0	0	0	0	0	0
denovo4007	D_0__Bacteria; D_1__Tenericutes; D_2__Mollicutes; D_3__Mycoplasmatales; D_4__Mycoplasmataceae; D_5__Mycoplasma; D_6__uncultured bacterium	0	0	0	0	0	0	0	0	0	0	0	0	0	0	0	0	0	0	0	0	0	0	0	0	0	0	0	0	0	0	0	0
denovo5159	D_0__Bacteria; D_1__Tenericutes; D_2__Mollicutes; D_3__Mycoplasmatales; D_4__Mycoplasmataceae; D_5__Mycoplasma; D_6__uncultured bacterium	0	0	0	0	0	0	0	0	0	0	0	0	0	0	0	0	0	0	0	0	0	0	0	0	0	0	0	0	0	0	0	0
denovo5193	D_0__Bacteria; D_1__Tenericutes; D_2__Mollicutes; D_3__Mycoplasmatales; D_4__Mycoplasmataceae; D_5__Mycoplasma; D_6__uncultured bacterium	0	0	0	0	0	0	0	0	0	0	0	0	0	0	0	0	0	0	0	0	0	0	0	0	0	0	0	0	0	0	0	0
denovo980	D_0__Bacteria; D_1__Tenericutes; D_2__Mollicutes; D_3__Mycoplasmatales; D_4__Mycoplasmataceae; D_5__Mycoplasma; D_6__uncultured bacterium	0	0	0	0	0	0	0	0	0	0	0	0	0	0	0	0	0	0	0	0	0	0	0	0	0	0	0	0	0	0	0	0
